# Supplementary material for: Transcriptome analysis of the response of Burmese python to digestion
Source: PubMed Central journal article supplement (PMC5597892; doi:10.1093/gigascience/gix057), 2017-07-13
Supplement: gix057_GIGA-D-16-00152_Original-Submission.pdf [file gix057_GIGA-D-16-00152_Original-Submission.pdf]

# Transcriptome Analysis of the Response of Burmese Python to Digestion

Jinjie Duan<sup>1</sup>, Kristian Wejse Sanggaard<sup>2,3</sup>, Leif Schauser<sup>5</sup>, Sanne Enok Lauridsen<sup>4</sup>, Jan J.  
Enghild<sup>2,3</sup>, Mikkel Heide Schierup<sup>1,4</sup> and Tobias Wang<sup>4</sup>

1. Bioinformatics Research Center, Aarhus University, Denmark

2. Department of Molecular Biology and Genetics, Aarhus University, Denmark

3. Interdisciplinary Nanoscience Center (iNANO), Aarhus University, Denmark

4. Department of Bioscience, Aarhus University, Denmark

5. QIAGEN Aarhus, Silkeborgvej 2, 8000 Aarhus C, Denmark

Corresponding authors: Jinjie Duan, Mikkel Heide Schierup & Tobias Wang

Email address:

Jinjie Duan: [jjduan@birc.au.dk](mailto:jjduan@birc.au.dk)

Kristian Wejse Sanggaard: [kristian@wejsesanggaard.dk](mailto:kristian@wejsesanggaard.dk)

Leif Schauser: [Leif.Schauser@qiagen.com](mailto:Leif.Schauser@qiagen.com)

Sanne Enok Lauridsen: [sanne.lauridsen@inano.au.dk](mailto:sanne.lauridsen@inano.au.dk)

Jan J. Enghild: [jje@mbg.au.dk](mailto:jje@mbg.au.dk)

Mikkel Heide Schierup: [mheide@birc.au.dk](mailto:mheide@birc.au.dk)

Tobias Wang: [tobias.wang@bios.au.dk](mailto:tobias.wang@bios.au.dk)

1 23 **Abstract**

2  
3  
4  
5 24 **Background:**

6  
7  
8 25 The exceptional and extreme feeding behaviour makes the Burmese python a unique and  
9  
10 26 interesting model to study physiological remodelling and metabolic adaptation in response to  
11  
12  
13 27 feeding after prolonged starvation. With outset in specific hypotheses based on in vivo  
14  
15  
16 28 physiological responses, we use transcriptome sequencing of five visceral organs and three  
17  
18 29 digestive stages to unravel the patterns of changes in the gene expression of Burmese python  
19  
20  
21 30 upon ingestion of a large meal. We first used the combined data to perform a *de novo*  
22  
23 31 assembly of the transcriptome. We supplemented with a proteomic survey of enzymes in the  
24  
25 32 gastric juice, stomach secretome and plasma during digestion assisted by our transcriptome  
26  
27  
28 33 sequence database.

29  
30  
31 34 **Results:**

32  
33  
34  
35 35 We constructed a high quality transcriptome with 34,423 transcripts of which 19,713 (57%)  
36  
37 36 were annotated. Among highly expressed genes (FPKM>100 in one tissue) we found  
38  
39  
40 37 differential expression for 43 genes in heart, 206 genes in liver, 114 genes in stomach, 89  
41  
42 38 genes in pancreas and 158 genes in intestine. We interrogated the function of these genes in  
43  
44 39 order to test previous hypothesis on the response to feeding. We also used the transcriptome  
45  
46  
47 40 to identify 314 secreted proteins in the python gastric juice.

48  
49  
50  
51 41 **Conclusions:**

52  
53  
54 42 We provide comprehensive transcriptome data of multiple organs and various digestive time  
55  
56  
57 43 of Burmese python and address specific hypothesis on certain pathways known to related  
58  
59  
60 44 digestion process. We also identify, for the first time, stomach-related proteins from a

1  
2  
3  
4  
5  
6  
7  
8  
9  
10  
11  
12  
13  
14  
15  
16  
17  
18  
19  
20  
21  
22  
23  
24  
25  
26  
27  
28  
29  
30  
31  
32  
33  
34  
35  
36  
37  
38  
39  
40  
41  
42  
43  
44  
45  
46  
47  
48  
49

45 digesting individual and thereby demonstrate that the sensitivity of modern LC-MS/MS  
46 equipment allows the identification of gastric juice proteins that are present during digestion  
47 thereby providing novel insight into the digestion mechanism.

48 Keywords:

49 Burmese Python, transcriptome, tissue expression, digestion, pathway, proteome

## Background

All animals exhibit dynamic changes in the size and functional capacities of bodily organs and tissues to match energetic maintenance costs to the prevailing physiological demands [1]. This phenotypic flexibility is particularly pronounced for the digestive organs in animals that naturally experience prolonged periods of fasting and ingest large prey items at irregular intervals. The Burmese python is one such model system for studying extreme phenotypes [1]. Many species of pythons easily endure months of fasting and subdue and ingest very large meals. In Burmese pythons, digestion is attended by a large and rapid increase in the mass and/or functional capacities of the intestine, stomach, heart and kidneys [2-4] in combination with a stimulation of secretory processes and an activation of enzymes and transporter proteins. These physiological responses of organ functions are associated with a many-fold rise in aerobic metabolism. Hence, the Burmese python is an excellent model to study the mechanisms underlying extreme metabolic transitions and physiological remodelling in response to altered demand [1, 3, 5-10].

The postprandial changes in the morphology and physiology of the intestine, heart and other organs have been described in some detail in pythons [1, 5, 8, 9, 11], but only a few studies [12-14] have addressed the underlying transcriptional changes of this interesting biological response. Transcriptome sequencing technology now allows comprehensive surveys [15, 16], and we therefore decided to use transcriptome sequencing of heart, liver, stomach, pancreas and intestine in snakes that had fasted for one month and at 24 and 48h into the postprandial period. As the Burmese python reference genome assembly [12] currently is relatively fragmented (contig size N50 ~10kb), we found it impractical to use re-sequencing approaches and opted instead to use our high coverage data to build a *de novo* transcriptome assembly to identify differentially expressed genes (DEGs). To identify the enzymes involved in the

1  
2  
3  
4  
5  
6  
7  
8  
9  
10  
11  
12  
13  
14  
15  
16  
17  
18  
19  
20  
21  
22  
23  
24  
25  
26  
27  
28  
29  
30  
31  
32  
33  
34  
35  
36  
37  
38  
39  
40  
41  
42  
43  
44  
45  
46  
47  
48  
49  
50  
51  
52  
53  
54  
55  
56  
57  
58  
59  
60  
61  
62  
63  
64  
65

74 digestion process, we initiated digestion, then isolated the digestive fluid and characterized

75 the protein composition using a proteomics-based approach. This also allowed us to

76 identify the major hydrolytic enzymes used to digest the large and un-masticated meals.

## 77 **Analyses**

### 78 Data summary

79 277,485,924 raw paired reads (2\*101 bp, insert size 180 bp) were obtained from Illumina Hi-  
80 Seq 2000 sequencing of 15 non-normalized cDNA libraries derived from 5 tissues (heart,  
81 liver, stomach, pancreas and intestine) at 3 time points (fasted for 1 month, 24h and 48h post-  
82 feeding) and 10 DSN-normalized cDNA libraries (see methods) (Supplementary Table S1).  
83 After removal of low-quality reads (See methods), 213,806,111 (77%) high-quality paired  
84 reads were retained. These reads contained a total 43,146,073,200 bp nucleotides with a mean  
85 Phred quality score of  $\geq 37$  (Q37). To develop a comprehensive transcriptomics resource  
86 for the Burmese python (Fig. 1), we pooled these high quality reads from 25 libraries for  
87 subsequent *de novo* assembly.

### 88 *de novo* transcriptome assembly and gene annotation

89 As short k-mers have a higher propensity to generate misassembled transcripts when using a  
90 de Bruijn graph-based *de novo* assembler, such as Velvet [17], we conservatively chose an  
91 assembly generated using long k-mers for subsequent analysis, at the cost of some sensitivity  
92 regarding assembled isoforms. Thus, balancing key metrics (Supplementary Table S2), we  
93 used an assembly based on the longest k-mer = 95 (Table 1), as it had the fewest  
94 scaffolds/transcripts (34,423), but represented a very large proportion (74%) of all reads. The  
95 scaffold N50 of this assembly was 1,673 bp. To evaluate our assembly of the transcriptome,  
96 we mapped and aligned the scaffolds against the reference genome of Burmese python [12].  
97 We found that 99.7% of transcripts mapped back to the genome assembly and that 86.2%  
98 transcripts had both a coverage percentage and an identity percentage of alignment greater  
99 than 90% (Supplementary Fig. S1). The high concordance between the *de novo* transcript

100 assembly and genome reference strengthened our confidence in using *de novo* assembly as  
101 our reference, and shows that the individual fragments were accurate although the reference  
102 genome assembly is fragmented. We also assess the completeness of our transcriptome  
103 assembly with the Benchmarking Universal Single-Copy Orthologs (BUSCO) strategy.  
104 Results showed 55.2% (1428 out of 2586) complete BUSCOs, 19.8% (512) fragmented  
105 BUSCOs and 25% (646) missing BUSCOs. These results are consistent with the survey [18]  
106 of assessment completeness of 28 transcriptomes from 18 vertebrates. In this survey, most of  
107 transcriptomes from species with close phylogenetic relationship to snake contain less than  
108 50% complete BUSCOs and more than 40% missing BUSCOs. Therefore we conclude the  
109 quality of our transcriptome assembly was well acceptable.

110 19,713 transcripts (57% of 34,423) were annotated using transfer of blastx hit  
111 annotation against the non-redundant (nr) NCBI peptide database [19]. To assign proper  
112 annotation for each transcript, we chose the first best hit that was not represented in  
113 uninformative descriptions (Supplementary Table S3). The most closely related species with  
114 an annotated genome, *Anolis carolinensis* was able to annotate 10,704 transcripts (54% of all  
115 annotated transcripts). Burmese Python and *A. carolinensis* both belong to the reptilian  
116 Squamata order, and are separated by approximately 120 million years of evolution [20].

117 Blast2GO [21] then annotated these 19,713 transcripts, and 16,992 of them could be  
118 assigned by one or more GO terms and functional roles were described. The distributions of  
119 the most frequently identified GO terms categories for biological process (BP), molecular  
120 function (MF) and cellular component (CC) are shown in Fig. S2. Moreover, we used the  
121 functionality of InterPro [22] annotations in Blast2GO to retrieve domain/motif information  
122 for our transcripts, and 21,023 transcripts were annotated by the InterPro database.

123 The Burmese python has the highest number of albumin isoforms reported

124 We observed 12 genes (Supplementary Table S4) annotated with ‘serum albumin  
1  
2 125 [Trimeresurus flavoviridis]’ and multiple sequence alignment of these 12 genes  
3  
4 126 (Supplementary Fig. S3) suggests they are dissimilar. 6 out of 12 genes were also identified  
5  
6  
7 127 at the protein-level by a proteomics analysis (LC-MS/MS) of python plasma (Supplementary  
8  
9  
10 128 Table S5). It illustrates that the python has at least 6 copies of albumin, whereas cobra, anole,  
11  
12 129 chicken have 2-3 copies and human has 4 copies on chromosome 4.

### 16 130 Gene expression analysis and principal component analysis

19 131 For comparisons between genes, expression profiles were obtained by mapping high quality  
20  
21  
22 132 reads to the reference transcriptome and the expression level was given by fragments per  
23  
24 133 kilobase per million sequenced reads (FPKM) [23]. For the study of expression profiles, we  
25  
26  
27 134 chose to investigate 1862 highly expressed genes (FPKM  $\geq$  100 in at least one tissue of 15),  
28  
29  
30 135 as it is known that for highly expressed genes, the biological variation among biological  
31  
32 136 replicates in the same tissue at the same stage is lower than for genes showing low expression  
33  
34 137 levels [24]. The majority (~64%) of these 1862 genes were expressed in all tissues, and only  
35  
36  
37 138 ~18% were expressed solely in one tissue (Supplementary Fig. S4). The liver had the highest  
38  
39 139 number of uniquely expressed genes, which may reflect its particular role in metabolism and  
40  
41  
42 140 excretion of waste products.

45 141 We used principal component analysis (PCA) to reveal overall differences in gene  
46  
47  
48 142 expression patterns among tissues and time points within the digestive period. The first three  
49  
50 143 principal components (PCs) accounted for ~58% of the variation (Supplementary Fig. S5).  
51  
52  
53 144 Despite the large overlap in expressed genes (Supplementary Fig. S4), the different tissues  
54  
55 145 exhibited distinct transcriptional signatures shown by the PCA in Figure 2, showing a  
56  
57  
58 146 tendency for 24h to represent an intermediate position between fasting and 48h. Liver,  
59  
60 147 intestine and stomach displayed greater shifts in the PCA plots compared to heart and



148 pancreas, and the largest changes occurred between fasting and 24h in the stomach and  
149 intestine. This fits well with the expectation that the stomach and intestine respond early in  
150 digestion [3] and the observation that the liver exhibit a more dramatic change in gene  
151 expression is consistent with the previous study [12] on pythons.

#### 152 Pattern of transcriptional responses to feeding

153 The responses to feeding involve thousands of genes and large changes in gene expression.  
154 To restrict the analysis of these many genes, we used a conservative approach where we  
155 selected genes that are both highly and differentially expressed with two strict thresholds (see  
156 methods). Application of these two thresholds yielded 43 genes for heart, 206 genes for liver,  
157 114 genes for stomach, 89 genes for pancreas and 158 genes for intestine, respectively, that  
158 were significantly differentially expressed in response to digestion (Fig. 3). To illustrate in  
159 greater detail, we enlarged the five sub-clusters with the most prominent increase in  
160 expression. These sub-clusters, labelled a - e in Figure 3, are shown with full annotation in  
161 Figures 4-8. To unravel the functional implications of these responses, we searched for genes  
162 encoding for proteins involved in processes of tissue re-organisation, cellular metabolism and  
163 digestion within these sub-clusters for each organ.

#### 164 GO enrichment analysis and colored KEGG pathway maps

165 To get a broader biological insight, compared to the strict threshold set used in the above  
166 clustering analysis, we applied a looser threshold set (Table 2) of defining DEG and highly  
167 expressed genes for functional annotation analysis. The summary of number of DEGs during  
168 digestion in each tissue is illustrated in Table 3. In each organ, most of genes (> 76%) have  
169 low expression (max FPKM < 10). Around 1% of the genes are highly expressed (max  
170 FPKM >= 200). The number of upregulated genes is approximately 3% in each organ, except

171 for the heart where only 0.57% of the genes were upregulated in response to feeding. This  
172 suggests that during digestion, the digestive organs, like liver, stomach, intestine and  
173 pancreas show more pronounced post feeding response than the heart. To dissect the  
174 functions of DEGs, we performed GO enrichment analysis with upregulated genes and highly  
175 expressed genes respectively for each organ (Figs. 9-13). As an example, the most  
176 significantly associated GO term to upregulated genes in stomach was “mitochondrial  
177 respiratory chain complex 1”, “endoplasmic reticulum membrane” and “cytosol” (Fig. 9a).

178 To specifically identify the pathways associated to DEGs and highly expressed genes,  
179 we mapped genes to KEGG [25, 26] human pathway maps and coloured the mapped entries  
180 with trend of gene expression during digestion (Table 2). We identified upregulated genes  
181 and highly expressed genes, respectively, involved in three selected pathways  
182 (glycolysis/gluconeogenesis, citrate cycle (TCA cycle), and oxidative phosphorylation) for  
183 each tissue (Table 4), and we performed the same identification for two main pathway  
184 categories in the KEGG pathway database (1.3 lipid metabolism and 1.5 amino acid  
185 metabolism; Table 5). The glycolysis/gluconeogenesis pathway, glyceraldehyde-3 phosphate  
186 dehydrogenase showed high expression in all organs.

#### 187 Identification of the python gastric juice proteome

188 We identified the secretome of the python stomach during digestion (Fig. 14). The resulting  
189 mass spectrometry data (containing 122538 MS/MS spectra) was used to interrogate our  
190 python transcriptome database, which includes transcriptome from stimulated stomach tissue.  
191 In total, 549 python proteins were identified using this approach. Afterwards, all  
192 identifications based on a single tryptic peptide were removed reducing the number of  
193 identified python proteins to 314 (Supplementary Table S6).

194 Five classical types of pepsinogens exist, namely pepsinogen A, B, and F,  
1  
2 195 progastricsin (or pepsinogen C), and prochymosin [27]. Of these, our analyses  
3  
4 196 (Supplementary table S7 and S8) show that pythons primarily rely on progastricsin for  
5  
6  
7 197 proteolytic digestion, as the five most abundant proteases identified in the gastric juice are  
8  
9  
10 198 annotated as progastricsin-like. Alignment of the sequences of the various transcripts for  
11  
12 199 gastricsin-like proteins shows considerable differences in sequence, which indicate the  
13  
14 200 presence of numerous different proteins with similar functions. This annotation is based on  
15  
16  
17 201 accession XP\_003220378.1 and XP\_003220378.1 from *Anolis Carolinensis*. Alignment of  
18  
19 202 the python sequences with the two anole sequences, as well as with the well-characterized  
20  
21  
22 203 human gastricsin variant, shows that both the active site residues, as well as cysteine bridges,  
23  
24 204 are conserved. It demonstrates the similarity between these enzymes and suggests that the  
25  
26 205 identified python sequences indeed represent catalytical active proteolytic enzymes (Fig. 15).  
27  
28  
29 206 The last identified pepsinogen-like python sequence (m.31615\_Py95) was annotated based on  
30  
31 207 the predicted embryonic pepsinogen-like sequence (XP\_003220239.1), also from *Anolis*  
32  
33  
34 208 *Carolinensis*. Here, the annotation originates from an embryonic pepsinogen identified in  
35  
36 209 chicken [28]. This protease was identified in the python's gastric juice with a lower emPAI  
37  
38  
39 210 value than the gastricsin sequences indicating a lower concentration of this enzyme  
40  
41 211 (Supplementary table S7), although the transcript displays the highest concentration of the  
42  
43  
44 212 analyzed pepsinogens in the post-prandial period (Supplementary table S8). As the name  
45  
46 213 indicate it is exclusively expressed during the embryonic period [28, 29], and phylogenetic  
47  
48  
49 214 analysis of the sequence suggest that its closest homolog, among the classical pepsinogens, is  
50  
51 215 prochymosin [28]. Also prochymosin, displays a temporal expression pattern and is, in  
52  
53  
54 216 mammals, mainly expressed in newborn species. However, the identified python snake  
55  
56 217 embryonic chicken pepsinogen homolog does not display a similar development-related  
57  
58 218 temporal expression pattern and is, as shown, used among adult species for digestion.  
59  
60  
61  
62  
63  
64  
65

219 However, it does not exclude that the protease is expressed during the python's embryonic  
1  
2 220 phase.

## 6 221 Identification of prey proteins and the python plasma proteome

10 222 Many of the obtained MS/MS spectra were expected to correspond to abundant mice  
11  
12 223 proteins, such as collagen. To facilitate the downstream analyses of the python proteins, we  
13  
14 224 produced a list of background proteins related to the prey. Hence, interrogation of the mass  
15  
16 225 spectrometry data against the 16693 mouse protein sequences in the Swiss-Prot database  
17  
18  
19 226 resulted in the identification of 212 mouse proteins, after removing hits based on single  
20  
21 227 peptides (Supplementary table S9). To produce a list of identified python proteins, most  
22  
23  
24 228 likely present in the digestive fluid samples due to blood contaminations during collection,  
25  
26 229 we characterized the python plasma proteome. The most abundant plasma proteins are  
27  
28  
29 230 produced by the liver. Consequently, our python transcriptome sequence database, which  
30  
31 231 encompasses liver transcriptomes, is expected to contain the protein sequences of the python  
32  
33  
34 232 plasma proteins. Thus, our python plasma LC-MS/MS data was used to interrogate our  
35  
36 233 python sequence database. It provided an overview of the most abundant python plasma  
37  
38  
39 234 proteins (Supplementary table S10). In total, 64 plasma proteins were identified with  
40  
41 235 minimum 2 tryptic peptides. The result supports the liver transcriptome data, since the  
42  
43 236 abundant (based on emPAI) plasma proteins correlate with the transcripts that are detected at  
44  
45  
46 237 high concentration in the liver tissue. The overall protein composition is similar to the  
47  
48  
49 238 composition in humans with albumin, fibrinogen, alpha-2-macroglobulin, immunoglobulins,  
50  
51 239 complement factors and apolipoproteins being the dominating proteins. One protein that  
52  
53 240 stands out is the anti-haemorrhagic factor cHLP-B (m.27\_Py95), which apparently is present  
54  
55  
56 241 in high concentration in the plasma of these snakes. This is a protease inhibitor of the  
57  
58 242 haemorrhagic -causing metalloproteinases present in snake venom and these inhibitors have  
59  
60  
61  
62  
63  
64  
65

243 previously been purified from serum of venomous snakes and thoroughly characterized [30,  
244 31]. Our data supports older studies that identify these inhibitors of the deleterious action of  
245 venom enzymes in non-venomous snakes [32].

#### 246 Identification of the python stomach secretome

247 To identify the python stomach secretome, the list of python proteins, identified in the  
248 digestive fluid (Supplementary table S6) was analyzed further. We assumed no overlap  
249 between abundant plasma proteins and proteins secreted by the stomach. Thus, plasma  
250 proteins, identified in the gastric juice, were assumed to be contaminations from blood and  
251 therefore the 64 identified plasma proteins were, when present, removed from the list.  
252 Subsequently, python proteins that most likely were identified based on prey proteins  
253 homology (*e.g.* python collagens and keratins, as well as conserved intracellular household  
254 proteins) were removed. These two steps reduced the list of proteins identified in the stomach  
255 samples from 314 to 114 proteins (Supplementary table S11). It cannot be excluded that a  
256 few proteins belonging to the python stomach secretome also were removed.

257 To identify the secretome, the 114 identified proteins were manually analyzed as  
258 described in the method section (Supplementary table S11). In addition to household proteins,  
259 the identified intracellular proteins also included intracellular stomach-specific proteins (*e.g.*  
260 the stomach specific calpain 9 cysteine protease [33]), underlining the specificity of the  
261 proteomics analysis. In total, 37 proteins constituted the putative python stomach secretome  
262 (Supplementary table S7). These could be divided into 18 gastric mucosal-related proteins  
263 (*e.g.* mucin homologous and gastrokine), 7 proteolytic enzymes (mainly pepsin homologous),  
264 4 other hydrolytic enzymes (*e.g.* phospholipases), and 8 other proteins (*e.g.* gastric intrinsic  
265 factor) (Supplementary table S7). Previous gastric juice proteomics analyses were performed  
266 on samples obtained from fasting humans, most likely to avoid the complex prey-protein

267 background. In our study, we identify, for the first time, stomach-related proteins from a  
1  
2 268 digesting individual and thereby demonstrate that the sensitivity of modern LC-MS/MS  
3  
4  
5 269 equipment allows the identification of gastric juice proteins that are present during digestion.  
6  
7  
8  
9  
10  
11  
12  
13  
14  
15  
16  
17  
18  
19  
20  
21  
22  
23  
24  
25  
26  
27  
28  
29  
30  
31  
32  
33  
34  
35  
36  
37  
38  
39  
40  
41  
42  
43  
44  
45  
46  
47  
48  
49  
50  
51  
52  
53  
54  
55  
56  
57  
58  
59  
60  
61  
62  
63  
64  
65

270 **Discussion**

1  
2  
3  
4 271 A primary motivation for our description of the temporal changes in gene expression profiles  
5  
6 272 as the visceral organs of Burmese pythons made the transition from fasting to digestion was  
7  
8 273 to identify key regulatory genes and pathways responsible for the pronounced tissue  
9  
10  
11 274 restructuring as well as the increased functional capacity during the postprandial period. An  
12  
13 275 equally important motivation was to address specific hypothesis on the upregulation of  
14  
15  
16 276 certain pathways known to be involved in the secretion of digestive juices and enzymes as  
17  
18 277 well as the absorption of the nutrients as digestion proceed. We achieved these goals by  
19  
20  
21 278 identifying the biochemical and physiological roles of the highly expressed genes with  
22  
23 279 significantly increased expression during digestion and by using KEGG analysis of specific  
24  
25  
26 280 pathways underlying physiological responses known to be stimulated by digestion. We also  
27  
28 281 present GO enrichment analyses of both up-regulated genes and highly expressed genes in all  
29  
30 282 organs (Figs. 9-13), showing that “biological process” is the most common enriched  
31  
32  
33 283 category.

34  
35  
36 284 **Physiological interpretation of the upregulated genes in the stomach**

37  
38  
39  
40 285 The considerable changes in gene expression in the stomach were reflected in a pronounced  
41  
42  
43 286 rise in expression of ribosomal 40S and 60S proteins (Fig. 4) that is likely to have attended a  
44  
45 287 rise in protein synthesis required for the marked transition from a quiescent fasting state to  
46  
47  
48 288 the activated digestive state. This is also supported by the presence of ribosomal functions in  
49  
50 289 the enriched GO analysis of the stomach of the highly expressed genes (Fig. 9B). During  
51  
52  
53 290 fasting, gastric acid secretion and presumably also the secretion of digestive enzymes and  
54  
55 291 lysozymes, is halted, such that the gastric juice has a neutral pH, whilst ingestion of prey is  
56  
57 292 followed by an immediate activation of gastric acid secretion [34, 35]. The stimulation of the  
58  
59  
60 293 secretory actions of the stomach is attended by an increased mass of the stomach, where

294 particularly the mucosa expands already within the first 24h [36].

295 The KEGG analysis, however, shows that the genes encoding for the gastric H,K  
296 ATPase, the active and ATP consuming ion-transporter responsible for gastric acid secretion,  
297 are highly expressed in fasting animals, and not additionally elevated in the postprandial  
298 period (Fig. 16). This strongly indicates that the enzymatic machinery for gastric acid  
299 secretion is maintained during fasting, a trait that may enable fast activation of acid secretion,  
300 at modest energetic expenditure, to kill bacteria and match gastric pH to the optimum value  
301 for pepsin. This interpretation is consistent with a number of recent studies indicating a rather  
302 modest contribution of gastric acid secretion to the specific dynamic action (SDA) response  
303 in pythons [37, 38], but we also did observe a high prevalence of ATP synthase subunits (Fig.  
304 4) amongst the highly upregulated genes, which does indicate a rise in aerobic metabolism  
305 (see also Fig. 9). Furthermore, the upregulation of the gene encoding for creatine kinase (Fig.  
306 4) indicate increased capacity for aerobic respiration required costs of acid secretion and the  
307 stimulation of the accompanying gastric functions. It has been proposed that gastric processes  
308 account for more than half of the rise in total metabolism during digestion [34], and aerobic  
309 metabolism of isolated gastric strips *in vitro* increased during digestion [39]. However, while  
310 metabolism of the stomach certainly must increase during the postprandial period, more  
311 recent studies indicate a considerably smaller contribution of gastric acid secretion to the total  
312 SDA response is considerable lower than 50% [37, 38, 40].

313 Our KEGG analysis also showed a large rise in expression of the gene encoding for  
314 carbonic anhydrase (Fig. 16), the enzyme that hydrates CO<sub>2</sub> and provide protons for gastric  
315 acid secretion. Gastric acid secretion, therefore, does not appear to under transcriptional  
316 regulation, but is likely to involve translocation of existing H,K ATPases in vesicles from  
317 intracellular vacuoles to the apical membrane of the oxyntopeptic cells that are responsible



318 for both gastric acid secreting as well as the release of pepsinogen in reptiles [41]. An  
1  
2 319 activation of the processes involved in vesicle transport is further supported by increased  
3  
4  
5 320 transcription of the gene encoding for CD63 (Fig. 4), which belongs to the tetraspanin family  
6  
7 321 and mediate signal transduction events.  
8  
9

10  
11 322 In contrast to acid secretion, expression of several genes encoding for digestive  
12  
13 323 enzymes (embryonic pepsinogen-like, gastricsin precursor and gastricsin-like) (Fig. 4) were  
14  
15 324 upregulated, which is consistent with *de novo* synthesis of the enzymes responsible gastric  
16  
17 325 protein degradation. Also there was good overlap between the upregulation of the relevant  
18  
19 326 genes encoding for the proteins identified in the stomach secretome, such as gastrokines,  
20  
21 327 pepsin homologous, phospholipases and gastric intrinsic factor (Supplementary table S7). In  
22  
23 328 this context, it is also interesting that mucin 6 (Fig. 4), the gene coding for the large  
24  
25 329 glycoprotein (gastric mucin) that protects the gastric mucosa from the acidic and  
26  
27 330 proteolytically active chyme in the stomach lumen was upregulated. Thus, as gastric acid  
28  
29 331 secretion is activated, probably in response to increased levels of the gastrin as well as  
30  
31 332 luminal factors, there is an accompanying activation of the protective mucus layer that  
32  
33 333 prevents auto-digestion of the gastric mucosa. It is also noteworthy that the genes for both  
34  
35 334 gastrokine 1 and 2 were upregulated during digestion (Fig. 4). Gastrokines are constitutively  
36  
37 335 produced proteins in the gastric mucosa in mammals and chickens, and while the  
38  
39 336 physiological function remain somewhat elusive, they appear to upregulated during mucosal  
40  
41 337 remodeling in response to inflammation (*e.g.* in connection with ulcers) and often  
42  
43 338 downregulated in cancers. Thus, it is likely that the gastrokines are involved in regulating the  
44  
45 339 restructuring of the mucosa during digestion in pythons.  
46  
47  
48  
49  
50  
51  
52  
53  
54  
55

56 340 In addition to analyzing the gene expression profiles of the stomach, we also used a  
57  
58 341 proteomics approach, assisted by our python transcriptome sequence database, to identify the  
59  
60  
61  
62  
63  
64  
65

342 hydrolytic enzymes in the gastric juice secreted during digestion. We identified python  
1  
2 343 proteins on a complex background of highly abundant mice proteins. Python's digested food  
3  
4  
5 344 is, when it enters the duodenum, overall similar to digested food in e.g. humans. Thus, the  
6  
7 345 digestive enzymes secreted by the pancreas are probably functional similar to known  
8  
9  
10 346 hydrolytic enzymes from other species. Consequently, the enzymes that facilitate the extreme  
11  
12 347 digestion process and allow for have to be present in the stomach's digestive fluid.  
13  
14

15  
16 348 We hypothesized that relative aggressive proteolytic digestive enzymes in the gastric  
17  
18 349 juice facilitate digestion of large and un-masticated whole prey items [8]. In our analysis, six  
19  
20  
21 350 out of the seven identified proteolytic enzymes were pepsinogens homologous (Peptidase  
22  
23 351 subfamily A1A), and these were also the most abundant hydrolytic enzymes in the gastric  
24  
25 352 juice according to the emPAI values (Supplementary table S7). Most likely other pepsinogen  
26  
27  
28 353 isoforms exist in the gastric juice, as our approach predominantly target the most abundant  
29  
30 354 proteolytic enzymes. The importance of the proteomics-identified pepsinogens was also  
31  
32  
33 355 substantiated by the transcriptomics data (Supplementary table S8). Here, we found that the  
34  
35 356 six different pepsinogens were upregulated between 2.2 and 22.2 fold from the fasting  
36  
37  
38 357 animals to 48 hours after ingestion of mice. In average the pepsinogen transcripts were  
39  
40 358 upregulated 10.7 fold. It supports that these proteases play a substantial role in the aggressive  
41  
42  
43 359 digestion process performed by the python.  
44  
45

46 360 Our proteomic analysis also suggested the identification of the pepsinogens as the  
47  
48  
49 361 major digestive proteolytic enzymes is similar to all other vertebrate species. Thus, our  
50  
51 362 results indicate that it is not unique (with respect to protease class) and hitherto  
52  
53  
54 363 uncharacterized proteases that facilitate the aggressive digestion process. Instead, pepsins,  
55  
56 364 homologous to pepsins among other species, digest the intact swallowed prey. The general  
57  
58  
59 365 condition in the stomach during digestion (e.g. pH) is also similar to other species. Thus, it is  
60  
61  
62  
63  
64  
65

366 likely that these pepsins variants are among the most effective and aggressive pepsins  
1  
2 367 identified so far and the provided sequence information facilitate future cloning, expression,  
3  
4  
5 368 and characterization of these potential industrial relevant enzymes.  
6  
7

8 369 Physiological interpretation of the upregulated genes in the intestine  
9

10  
11  
12 370 The small intestine of pythons undergoes a remarkable and fast expansion during digestion  
13  
14 371 where both wet and dry mass more than doubles within the first 24 hours. The expansion  
15  
16  
17 372 stems primarily from increased mucosal mass, achieved by swelling of the individual  
18  
19 373 enterocytes [42], while the smooth muscle in the gut wall is much less responsive [43].  
20  
21  
22 374 Nevertheless, the GO enrichment analysis also highlights functions pertaining to mitotic cell  
23  
24 375 division, which may indicate a contribution to growth by hyperplasia faster cell turnover (Fig.  
25  
26  
27 376 10). The expansion of the individual enterocytes is accompanied by pronounced elongation  
28  
29 377 of the microvilli [44] and the resulting rise in surface area of the intestinal lining is  
30  
31  
32 378 accompanied by an ten-fold increase in intestinal transport capacity for amino acids and other  
33  
34 379 nutrients [1, 4, 45]. It remains, however, unknown to what extent the increased capacity for  
35  
36  
37 380 nutrient uptake is also driven by increased synthesis of nutrient transporters. In this context, it  
38  
39 381 is noteworthy that there were no nutrient transporters amongst the highly expressed and  
40  
41 382 upregulated genes in the intestine (Fig. 5), but our KEGG analysis nevertheless showed  
42  
43  
44 383 increased expression of the serosal L-type amino acid transporter. Clearly, it would be  
45  
46 384 worthwhile to quantitatively analyze the extent to which *de novo* synthesis of the various  
47  
48  
49 385 nutrient transporters, particularly those for amino acids, is increased during digestion and  
50  
51 386 how much such synthesis contribute to absorptive capacity. It would seem adaptive if many  
52  
53  
54 387 of the transporters merely have to be activated, either by insertion within the luminal  
55  
56 388 membrane or exposed as the enterocytes expand, to allow for an energetically cheap manner  
57  
58 389 of matching intestinal performance to the sudden appearance of nutrients in the intestine after  
59  
60  
61  
62  
63  
64  
65

390 a meal. The GO enrichment analysis also pointed to an enrichment of various metabolic  
1  
2 391 processes during digestion, particularly for the upregulated genes (Fig. 10). It is noteworthy  
3  
4  
5 392 that the expression of genes for glutathione S-transferase, peroxiredoxin and selenoprotein  
6  
7 393 increased during digestion (Fig. 5). These three proteins are involved in cellular defence,  
8  
9  
10 394 particularly as antioxidants as a likely protection of reactive oxygen species resulting from  
11  
12 395 increased aerobic metabolism.  
13  
14

15  
16 396           There is consensus that the anatomical and structural responses underlying this  
17  
18 397 phenotypic flexibility of intestinal function occur at modest energetic expenditure [34, 46,  
19  
20  
21 398 47], but our expression profile does show increased expression of the gene coding for  
22  
23 399 Cytochrome P450 pointing to increased aerobic and mitochondrial metabolism. This rise in  
24  
25 400 metabolism may be driven primarily by the massive rise in secondary active transport to  
26  
27  
28 401 absorb the amino acids and smaller peptides rather than the structural changes [46].  
29  
30 402 Nevertheless, the structural changes may be reflected in increased expression of galectin 1  
31  
32  
33 403 (Fig. 5), which mediate numerous function including cell–cell interactions, cell–matrix  
34  
35 404 adhesion and transmembrane signaling.  
36  
37  
38

39 405           Fig. 5 reveals the importance of lipid absorption and the subsequent transport by the  
40  
41 406 cardiovascular and lymph systems, and it is also possible that several of the expressed  
42  
43  
44 407 proteins play a role in the incorporation of lipid droplets within the enterocytes. Thus, the  
45  
46 408 presence of numerous apolipoproteins, and their precursor apoe protein, amongst the list of  
47  
48  
49 409 highly expressed and highly expressed genes (Fig. 5) are probably needed to transport the  
50  
51 410 absorbed lipids in plasma and lymph, but the apolipoproteins could also act enzyme  
52  
53  
54 411 cofactors, receptor ligands, and lipid transfer carriers in the regulation of lipoprotein  
55  
56 412 metabolism and cellular uptake. Diazepam-binding inhibitor (Fig. 5), a protein involved in  
57  
58  
59 413 lipid metabolism and under hormonal regulation mostly within nervous tissue, is also likely  
60  
61  
62  
63  
64  
65

1  
2  
3  
4  
5  
6  
7  
8  
9  
10  
11  
12  
13  
14  
15  
16  
17  
18  
19  
20  
21  
22  
23  
24  
25  
26  
27  
28  
29  
30  
31  
32  
33  
34  
35  
36  
37  
38  
39  
40  
41  
42  
43  
44  
45  
46  
47  
48  
49  
50  
51  
52  
53  
54  
55  
56  
57  
58  
59  
60  
61  
62  
63  
64  
65

414 to reflect the increased lipid absorption and metabolism in the postprandial period, and there  
415 was also a rise phospholipases (Fig. 5) that are likely to be involved in lipid degradation.  
416 Also, the capacity for protein metabolism clearly increased in the intestine during digestion  
417 (meprin A and endopeptidase that cleaves peptides, as well as 4-aminobutyrate  
418 aminotransferase, 4-trimethylaminobutyraldehyde dehydrogenase and diamine  
419 acetyltransferase) and there was a rise in the ammonium transporter protein Rh (Fig. 5).  
420 Finally, a number of proteins involved in calcium uptake and metabolism, such as calbindin  
421 and calmodulin (Fig. 5), could be important to handle the break-down of the bone in a normal  
422 rodent, and it was recently shown the enterocytes of pythons contain small particles of bone  
423 already 24 hours after ingestion [44].

#### 424 Physiological interpretation of the upregulated genes in the heart

425 The large metabolic response to digestion is tailored by a doubling of heart rate and stroke of  
426 the heart such that cardiac output remains elevated for many days during digestion [48, 49].  
427 This cardiovascular response plays a pivotal role in securing adequate oxygen delivery to the  
428 various organs and serves to ensure an appropriate convective transport of the nutrients taken  
429 up by the intestine. The tachycardia is mediated by a release of vagal tone and the presence of  
430 a non-adrenergic-non-cholinergic stimulation of the heart, which has been speculated to be  
431 released from the gastrointestinal organs during digestion [50, 51]. The increased heart rate,  
432 and the rise in the amount of blood pumped with each beat, must be supported by increased  
433 metabolism of the myocardium and we observed a significant upregulation of malate  
434 dehydrogenase, cytochromes and ATPase linked enzymes (Fig. 6) that are likely to be related  
435 to an increased oxidative phosphorylation within the individual myocytes (see also the  
436 prevalence of enriched GO terms associated with aerobic metabolism in Fig. 13). Previous  
437 gene expression studies on the python heart also yielded evidence for increased oxidative

438 capacity in postprandial period [52] and cytochrome oxidase activity is almost doubled  
1  
2 439 during digestion [53], and we confirm that transcription for heat shock proteins may be  
3  
4  
5 440 increased [52], possibly to protect against oxidative damage as result of the increased  
6  
7 441 metabolism. As in earlier studies [52], our observation of increased ATP synthase  
8  
9  
10 442 lipid-binding protein and fatty acid binding protein 3 (Fig. 6) provide evidence for increased  
11  
12 443 fatty acid metabolism, which may reflect the substantial rise in circulating fatty acids in the  
13  
14 444 plasma.

15  
16  
17  
18 445           It was originally suggested that the postprandial rise in stroke volume could be  
19  
20  
21 446 ascribed to an impressive and swift growth of the heart [10], possibly triggered lipid-  
22  
23 447 signalling [52]. However, a number of recent studies, primarily from our laboratory, have  
24  
25 448 shown that increased cardiac mass is not an obligatory postprandial response amongst  
26  
27  
28 449 pythons [53-55], and that stroke volume may be increased in response to increased venous  
29  
30 450 return rather than cardiac hypertrophy [53]. It is nevertheless, noteworthy that our and the  
31  
32  
33 451 previous studies show a clear increase in the expression of contractile proteins (e.g. myosin  
34  
35 452 and actin) as well as tubulin (Fig. 6), which may reflect increased protein-turnover in  
36  
37  
38 453 response to increased myocardial workload rather than cell proliferation or hypertrophy. The  
39  
40 454 enriched GO analyses also point to major changes in the extracellular space as well as both  
41  
42  
43 455 elastin and collagen, which may indicate some level of cardiac reorganisation at the cellular  
44  
45 456 or subcellular level that may alter compliance of the myocardial wall and influence cardiac  
46  
47 457 filling (Fig. 13). It is noteworthy that the increased expression of BNP may serve a signalling  
48  
49  
50 458 function as described in response to the cardiac hypertrophy that attends hypertension.

51  
52  
53 459 Physiological interpretation of the genes in the liver

54  
55  
56  
57 460 The liver exhibited a diverse expression profile in response to digestion that is likely to  
58  
59  
60 461 reflect its many metabolic functions in connection with metabolism, synthesis and

1  
2  
3  
4  
5  
6  
7  
8  
9  
10  
11  
12  
13  
14  
15  
16  
17  
18  
19  
20  
21  
22  
23  
24  
25  
26  
27  
28  
29  
30  
31  
32  
33  
34  
35  
36  
37  
38  
39  
40  
41  
42  
43  
44  
45  
46  
47  
48  
49  
50  
51  
52  
53  
54  
55  
56  
57  
58  
59  
60  
61  
62  
63  
64  
65

462 detoxification during the postprandial period. This patterns is also evident from the many  
463 metabolic functions identified in the enriched GO analysis (Fig. 12). There were marked  
464 upregulations of the P450 system (Fig. 7), which stems well with a rise in synthesis and  
465 breakdown of hormones and signaling molecules, cholesterol synthesis in response to lipid  
466 absorption and possibly also an increased metabolism of potentially toxic compounds in the  
467 prey. A rise in cholesterol metabolism was supported by increased expression apolipoproteins  
468 (Fig. 7). The hepatic involvement in lipid metabolism was also supported by the increased  
469 expression of genes for Alpha-2-macroglobulin and serum albumin (Fig. 7). The increased  
470 expression of albumin obviously also fits nicely with the proteomic analysis of plasma  
471 proteins and it is likely that the postprandial rise in plasma albumin serves a functional role in  
472 the lipid transport between the intestine and the liver as well as other metabolically active  
473 organs

474 It is also noteworthy that a number of genes associated with the protection of  
475 oxidative stress, such as catalase, heat shock protein and glutathionine transferase were  
476 markedly upregulated (Fig. 7). It was recently argued that snakes digesting large meals  
477 experience oxidative damage due to reactive oxygen metabolites requiring increased  
478 antioxidant responses to protect cellular functions [56].

#### 479 Physiological interpretation of the genes in the pancreas

480 We sampled the entire pancreas for our analysis of gene expression and our data therefore  
481 reflect both endocrine and exocrine pancreatic functions. The vast majority of the upregulated  
482 genes concerned the exocrine pancreas, and we found ample evidence for upregulated  
483 expression of genes associated with the digestive functions, such as lipases, trypsin,  
484 chymotrypsin and elastase and other enzymes for digestion of protein and lipid (Fig. 8). This  
485 general upregulation of secretory processes is likely to explain the prevalence of processes

1  
2  
3  
4  
5  
6  
7  
8  
9  
10  
11  
12  
13  
14  
15  
16  
17  
18  
19  
20  
21  
22  
23  
24  
25  
26  
27  
28  
29  
30  
31  
32  
33  
34  
35  
36  
37  
38  
39  
40  
41  
42  
43  
44  
45  
46  
47  
48  
49  
50  
51  
52  
53  
54  
55  
56  
57  
58  
59  
60  
61  
62  
63  
64  
65

486 associated with protein synthesis in the enriched GO analysis (Fig. 11). There was even an  
487 increased expression of amylase (Fig. 8) that breaks down polysaccharides. In connection  
488 with this latter function, the increased expression of insulin (Fig. 8) from the endocrine  
489 pancreas is likely to reflect increased cellular signaling for postprandial uptake of both  
490 glucose and amino acids. As in the other organs, we found increased expression of  
491 cytochrome oxidase (Fig. 8) indicative of increased metabolism during digestion, and the rise  
492 in heat shock protein expression may reflect a response to formation of reactive oxygen-  
493 species as metabolism is stimulated by increased secretion of the pancreas.



494 **Conclusions**

1  
2  
3  
4 495 Our study shows that the substantial physiological and anatomical reorganisation of the  
5  
6 496 visceral organs during the postprandial period is driven by massive changes in gene  
7  
8 497 expression profiles involving differential expression of hundreds or thousands of genes.  
9  
10  
11 498 Many of the upregulated functions pertain to energy production to support the rise in  
12  
13 499 metabolism associated with digestion and absorption of the large meals. In terms of the  
14  
15  
16 500 gastrointestinal organs, the gene expression profiles also supports the view that many of the  
17  
18 501 digestive functions, such as gastric acid secretion and nutrient absorption, can be stimulated  
19  
20  
21 502 with little gene expression indicating that the proteins involved in these processes are merely  
22  
23 503 need to be activated during the postprandial period, and thus avoiding the energy and time-  
24  
25 504 consuming processes associated with *de novo* synthesis. This digestive strategy may, at least  
26  
27  
28 505 in part, explain how intermittent feeders, such as snakes, retain the capacity for fast and  
29  
30 506 reliable upregulation of the digestive processes immediately after ingestion.  
31  
32  
33  
34  
35  
36  
37  
38  
39  
40  
41  
42  
43  
44  
45  
46  
47  
48  
49  
50  
51  
52  
53  
54  
55  
56  
57  
58  
59  
60  
61  
62  
63  
64  
65

1  
2  
3  
4  
5  
6  
7  
8  
9  
10  
11  
12  
13  
14  
15  
16  
17  
18  
19  
20  
21  
22  
23  
24  
25  
26  
27  
28  
29  
30  
31  
32  
33  
34  
35  
36  
37  
38  
39  
40  
41  
42  
43  
44  
45  
46  
47  
48  
49  
50  
51  
52  
53  
54  
55  
56  
57  
58  
59  
60  
61  
62  
63  
64  
65

507 **Methods**

508 Stimulation of the postprandial response, collection of tissue biopsies and purification of  
509 RNA for mRNA-seq analyses

510 Six *Python molurus* (Tiger Python/Burmese Python) with a body mass ranging from 180 to  
511 700 g (average 373 g) were obtained from a commercial supplier and housed in vivaria with a  
512 heating system providing temperatures of 25-32 °C. The animals were fed rodents once a  
513 week and fresh water was always available. The animals appeared healthy and all  
514 experiments were performed according to Danish Federal Regulations. All six individuals  
515 were fasted for one month and divided in three groups. Four animals were fed a rodent meal  
516 of 25 % of body weight and euthanized with an intra-peritoneal injection of pentobarbital (50  
517 mg kg<sup>-1</sup>; Mebumal) at 24h (N = 2) or 48h after feeding (N = 2). The remaining two snakes  
518 served as fasted controls. During deep anaesthesia, two biopsies were obtained from each  
519 snake from each of the following tissues: The heart (ventricles), liver, stomach, intestine, and  
520 pancreas. In regard to the stomach tissue samples, one sample was obtained from the  
521 proximal part of the stomach and one sample was obtained from the distal part. In total, 60  
522 biopsies were collected. The samples were taken from the same part of the different tissues in  
523 all individuals. After sampling, the biopsies were weighted and immediately snap frozen in  
524 liquid nitrogen; stomach and intestinal tissues were rinsed in sterile saline solution before  
525 weighting to avoid contamination with rodent tissue from the ingested meal. Subsequently,  
526 all 60 biopsies were homogenized in liquid nitrogen and the four biological replicates (2  
527 biopsies from each individual) were pooled in a 1:1 manner based on mass. It resulted in 15  
528 samples (5 tissues X 3 time points). From these samples, total RNA was purified using the  
529 Nucleospin RNA II kit (Machery-Nagel GmbH & Co.), as recommended by the  
530 manufacturer. The RNA concentration and quality were assessed by Nanodrop ND 1000

1  
2  
3  
4  
5  
6 531 Spectrophotometer (Thermo Scientific) analyses, agarose gel-electrophoreses, and Agilent  
7  
8  
9  
10 532 BioAnalyzer (Agilent) analyses.  
11  
12  
13  
14 533 Library production and sequencing  
15  
16  
17 534 Poly-A transcripts were enriched and the transcripts broken in the presence of Zn<sup>2+</sup>.  
18  
19 535 Subsequently, double-stranded cDNA was synthesised using random primers and RNase H.  
20  
21 536 After end repair and purification, the fragments were ligated with bar-coded paired-end  
22 537 adapters, and fragments with insert sizes of approximately 150-250 bp were isolated from an  
23  
24 538 agarose gel. Each of the 15 samples derived from 5 tissues (heart, liver, stomach, pancreas  
25  
26 539 and intestine) at the 3 time points (fasted for 1 month, 24h and 48h post-feeding) were  
27  
28 540 amplified by PCR to generate DNA colonies template libraries and the libraries were then  
29  
30 541 purified. In addition, a part of the samples, which originating from the same tissue, were  
31  
32 542 pooled before the PCR analyses, i.e. in total five pooled samples were generated. These five  
33  
34 543 samples were split in two and after PCR amplification and library purification they were  
35  
36 544 normalized using two different normalization protocols, i.e. in total 10 normalized libraries  
37  
38 545 were prepared. Library quality of all 25 samples was then assessed by a titration-run (1 x 50  
39  
40 546 bp) on an Illumina HiSeq 2000 instrument. Finally the sequencing was performed on the  
41  
42 547 same instrument using paired-reads (2 × 101 bp). One channel was used for the 15 non-  
43  
44 548 normalized libraries and one channel was used for the 10 normalized libraries.  
45  
46  
47 549 Data pre-processing and *de novo* transcriptome assembly  
48  
49  
50  
51 550 To reduce the amount of erroneous data, the raw paired reads were processed by i) removing  
52  
53 551 reads that contained the sequencing adaptor, ii) removing reads that contained ambiguous  
54  
55 552 characters (Ns), and iii) trimming bases that had the low average quality (Q<20) within a  
56  
57 553 sliding window of length 10.  
58  
59  
60  
61  
62  
63  
64  
65

554 To develop a comprehensive transcriptomics resource for the Burmese python, all  
1  
2 555 high-quality reads from 25 libraries were pooled together for *de novo* assembly. To determine  
3  
4  
5 556 the optimal assembly, *de novo* assembly was performed using Velvet (version 1.2.03) [17]  
6  
7 557 and Oases (version 0.2.06) [57] with different k-mer parameters. The performance of these  
8  
9  
10 558 assemblies were assessed according to number of transcripts, total length of transcripts, N50  
11  
12 559 length, mean length, proportion of mapped reads and number of transcripts which length is  
13  
14  
15 560 larger than N50 (Supplementary Table S2).

16  
17  
18 561 Annotation of the transcriptome and alignment with the genome sequence  
19  
20  
21

22 562 To assess the identity of the most closely related gene in other organisms, the assembled  
23  
24  
25 563 transcripts were compared with the sequences in the National Center for Biotechnology  
26  
27 564 Information (NCBI) non-redundant protein (nr) database using blastx [58] with an e-value  
28  
29 565 cut-off of 0.01. The nr annotation term of each transcript was assigned with the first best hit,  
30  
31  
32 566 which was not represented in uninformative description (e.g., 'hypothetical protein', 'novel  
33  
34 567 protein', 'unnamed protein product', 'predicted protein' or 'Uncharacterized protein')  
35  
36  
37 568 (Supplementary Table S3). To assign functional annotations of transcripts, Blast2GO was  
38  
39 569 used (e-value threshold = 0.01) to return GO annotation, Enzyme code annotation with  
40  
41  
42 570 KEGG maps and InterPro annotation.

43  
44  
45 571 Gmap [59] was used to map and align our assembled transcripts to python reference  
46  
47  
48 572 genome with parameters 'intronlength = 30000'.

49  
50  
51 573 Assessment of the completeness of transcriptome assembly  
52  
53  
54

55 574 BUSCO\_v2 [18] was used to test the completeness of transcriptome assembly with  
56  
57 575 dependencies NCBI BLAST+ 2.4.0 [60] and HMMER 3.1b2 [61]. The vertebrata lineage set  
58  
59 576 was used and accessed on 28 Nov 2016.

577 Mutiple sequence alignment of albumin-like genes

578 T-coffee (version 11.00) [62] was used with default parameters for multiple sequence  
579 alignment of albumin-like genes.

580 Estimation of gene expression values

581 For each 15 non-normalized libraries, the paired-end reads were firstly mapped back to  
582 assembled transcriptome using Bowtie2 [63]with default parameters, the raw counts then  
583 were calculated based on the alignment results using RSEM (version 1.1.20) [64] for each  
584 transcript. To quantify the gene expression level, for genes with alternative splicing  
585 transcripts, the longest transcript was selected to represent the gene, and a gene's abundance  
586 estimate was the sum of its transcripts' abundance estimates. Finally the raw expression  
587 counts were normalized into FPKM with custom Perl scripts.

588 PCA

589 To facilitate graphical interpretation of tissue relatedness, R function prcomp was used to  
590 perform PCA with genes which the maximum FPKM of 15 samples was greater than 100.

591 Identification of DEGs and clustering analysis

592 For each tissue, DEGs were selected with two thresholds, 1) FPKM is greater than or equal to  
593 400 in at least one time point and 2) fold change (FC) is greater than or equal to 2 in at least  
594 one pairwise comparison among three time points. FPKM values of DEGs were log<sub>2</sub>-  
595 transformed and median-centered, then hierarchical clustering was performed using R  
596 command hclust with method = 'average' and distance = 'Spearman correlation' and results  
597 were displayed using R command heatmap.2.

598 Colored KEGG Pathway and GO enrichment analysis

1  
2  
3  
4 599 For each tissue, all assembled genes were mapped to KEGG human pathway maps using  
5  
6 600 KOBAS 2.0 [65] with e-value  $1e-50$ . Then genes were colored by representing FPKM value  
7  
8 601 and trend of differential expression value (Table 2).

10  
11  
12 602 Blast2GO was used to implement GO enrichment analysis (Fisher's exact test) with  
13  
14 603 threshold of FDR 0.001. The reference set is the whole transcripts with GO slim annotation.  
15  
16  
17 604 For each organ, the selected test set is either upregulated or highly expressed genes defined in  
18  
19 605 Table 2. Finally, we performed Blast2GO to reduce to most specific GO terms.

20  
21  
22  
23 606 Isolation of samples for proteomics analyses

24  
25  
26  
27 607 Two Burmese python at 400 g and 800 g were fed a rodent meal corresponding to  
28  
29 608 approximately 25% of body weight. Approximately 24 h into the postprandial period the  
30  
31 609 animals were euthanized with an overdose of pentobarbital. Immediately afterwards, an  
32  
33  
34 610 incision was made to expose the stomach, which was then ligated at the lower oesophagus  
35  
36 611 and the pylorus, before the intact stomach was excised by a cleavage just below the two  
37  
38  
39 612 sutures resulting in the stomach being released from the rest of the animal. All undigested  
40  
41 613 mouse remains were manually removed by forceps and 25 ml/kg tris-buffered saline (TBS)  
42  
43  
44 614 was injected into the stomach. The stomach was then ligated at the opened end, rinsed by  
45  
46 615 gently shaking the tissue, and finally the digestive fluid-containing solution was collected and  
47  
48  
49 616 stored on ice. To ensure collection of all gastric fluid, the stomach was rinsed an additional 2-  
50  
51 617 3 times with 12 ml/kg TBS. Subsequently, the samples were filtered and centrifuged, and the  
52  
53  
54 618 supernatant stored at  $-80\text{ }^{\circ}\text{C}$ . The last digestive fluid sample was obtained from a 200 g  
55  
56 619 Burmese python, fed 4 g peptone (Sigma Aldrich), a mixture of small peptides and amino  
57  
58 620 acids, suspended in water. The peptone was injected directly into the stomach and after 3  
59  
60  
61  
62  
63  
64  
65

621 hours the snake was euthanized by an overdose of pentobarbital. The stomach was removed,  
622 rinsed with TBS, and a single sample collected and stored, as described above. In addition, to  
623 the six digestive fluid samples a single plasma sample was also obtained.

#### 624 Sample preparation for mass spectrometry analyses

625 The proteins in the six obtained python digestive fluid samples were recovered by  
626 trichloroacetic acid precipitation. The resulting pellets were resuspended in 8 M Urea, 5 mM  
627 DTT, 0.1 M ammonium bicarbonate pH 8.0 and incubated for 30 minutes at room  
628 temperature in order to denature and reduce the proteins. Subsequently, the proteins were  
629 alkylated by the addition of iodoacetamide to a final concentration of 25 mM. The samples  
630 were incubated for additional 20 minutes at room temperature and then diluted 5 times with a  
631 50 mM ammonium bicarbonate, pH 8.0 buffer before the addition of approximately 2 µg  
632 sequencing grade modified trypsin (Promega) per 50 µg protein in the sample. Subsequently,  
633 the samples were incubated at 37 °C for approximately 16 h. The proteins in the plasma  
634 sample were denatured, reduced, alkylated, and digested with trypsin, as described for the  
635 digestive fluid samples. Finally, the resulting peptides in all samples were micropurified and  
636 stored at -20 C until the LC-MS/MS analyses.

#### 637 Liquid chromatography-tandem mass spectrometry analyses

638 Nano-liquid chromatography-tandem mass spectrometry (LC-MS/MS) analyses were  
639 performed on a nanoflow HPLC system (Thermo Scientific, EASY-nLC II) connected to a  
640 mass spectrometer (TripleTOF 5600, AB Sciex) equipped with an electrospray ionization  
641 source (NanoSpray III, AB Sciex) and operated under Analyst TF 1.6 control. The samples  
642 were dissolved in 0.1% formic acid, injected, trapped and desalted isocratically on a  
643 precolumn whereupon the peptides were eluted and separated on an analytical column (16 cm

644 × 75 µm i.d.) packed in-house with ReproSil-Pur C18-AQ 3 µm resin (Dr. Marisch GmbH).  
1  
2 645 The peptides were eluted at a flow rate of 250 nL/min using a 50 min gradient from 5 % to 35  
3  
4  
5 646 % phase B (0.1 % formic acid and 90 % acetonitrile). An information dependent acquisition  
6  
7 647 method was employed allowing up to 25 MS/MS spectra per cycle of 2.8 s.  
8  
9

#### 10 648 Protein identification and filtering of data

11  
12  
13  
14 649 The six collected MS files, related to digested fluid, were converted to Mascot generic format  
15  
16  
17 650 (MGF) using the AB SCIEX MS Data Converter beta 1.3 (AB SCIEX) and the “proteinpilot  
18  
19 651 MGF” parameters. Subsequently, the files were merged to a single MGF-file using Mascot  
20  
21  
22 652 daemon. The resulting file (encompassing 122538 MS/MS queries) was used to interrogate  
23  
24 653 the 16693 *Mus musculus* sequences in the Swiss-Prot database (version 2014\_10) and the  
25  
26  
27 654 generated python database encompassing 21131 protein sequences using Mascot 2.5.0  
28  
29 655 (Matrix Science)[66]. Trypsin, with up to one missed cleavage allowed, was selected as  
30  
31  
32 656 enzyme; carbamidomethyl was employed as fixed modification, and oxidation of methionine  
33  
34 657 and proline was selected as variable modifications. The instrument setting was specified as  
35  
36  
37 658 ESI-QUAD-TOF, the mass accuracy of the precursor and product ions was 15 ppm and 0.2  
38  
39 659 da respectively, and the significance threshold ( $p$ ) was set to 0.01 and an expect cut-off at  
40  
41 660 0.005. The data obtained by the LC-MS/MS-analysis of the python plasma proteome was  
42  
43  
44 661 analyzed as described for the digestive fluid samples, except that the *Mus musculus*  
45  
46 662 sequences were not interrogated. This dataset contains 9224 MS/MS queries. All obtained  
47  
48  
49 663 results were subsequently parsed using MS Data Miner v. 1.3.0 [67], and protein hits were  
50  
51 664 only accepted if they were identified based on two unique peptides.  
52  
53

54  
55 665 To identify the proteins secreted into the python stomach, identified python plasma  
56  
57 666 proteins, as well as the mouse protein homologs were removed from the list of identified  
58  
59  
60 667 python digestive fluid proteins. With regard to the removal of prey protein homologs, the  
61  
62  
63  
64  
65



1 668 overall mouse protein names were used to search the list of python proteins (e.g. “collagen”  
2 669 was used as search term, not “collagen alpha-1(I) chain”) and to identify python proteins that  
3  
4 670 were identified based on homology with mouse. These proteins were removed from the list of  
5  
6  
7 671 stomach-secreted python proteins. For each identified protein remaining on the list, we  
8  
9  
10 672 reassessed the annotation of the python sequence, i.a. sequence comparisons were performed  
11  
12 673 using blastp version 2.2.30, and in addition, UniProt and NCBI protein databases, as well as  
13  
14 674 PubMed and SignalP 4.1, were interrogated to identify functional properties and cellular  
15  
16  
17 675 location of the identified proteins. Plasma proteins, remaining collagen homologous,  
18  
19 676 intracellular proteins, and membrane proteins were discarded from the list of identified  
20  
21  
22 677 python stomach secretome proteins.  
23  
24  
25  
26  
27  
28  
29  
30  
31  
32  
33  
34  
35  
36  
37  
38  
39  
40  
41  
42  
43  
44  
45  
46  
47  
48  
49  
50  
51  
52  
53  
54  
55  
56  
57  
58  
59  
60  
61  
62  
63  
64  
65

678 **List of abbreviations**

1  
2  
3  
4  
5  
6  
7  
8  
9  
10  
11  
12  
13  
14  
15  
16  
17  
18  
19  
20  
21  
22  
23  
24  
25  
26  
27  
28  
29  
30  
31  
32  
33  
34  
35  
36  
37  
38  
39  
40  
41  
42  
43  
44  
45  
46  
47  
48  
49  
50  
51  
52  
53  
54  
55  
56  
57  
58  
59  
60  
61  
62  
63  
64  
65

679 DEG differentially expressed genes

680 FC fold change

681 FPKM fragments per kilobase per million sequenced reads

682 PCA principal component analysis

1 683 **Declarations**  
2  
3  
4  
5 684 Ethics approval and consent to participate  
6  
7  
8 685 Not applicable  
9  
10  
11  
12 686  
13  
14  
15  
16 687 Consent for publication  
17  
18  
19 688 Not applicable  
20  
21  
22  
23 689  
24  
25  
26  
27 690 Availability of data and material  
28  
29  
30 691 The raw RNA-Seq sequencing data that support the findings of this study have been  
31  
32 deposited in the NCBI BioProject database (accession no. PRJNA343735).  
33 692  
34  
35 693 <https://www.ncbi.nlm.nih.gov/bioproject/PRJNA343735>  
36  
37  
38  
39 694  
40  
41  
42 695 Competing interests  
43  
44  
45  
46 696 The authors declare that they have no competing interests.  
47  
48  
49  
50 697  
51  
52  
53 698 Funding  
54  
55  
56  
57 699 This work was supported by a grant (Novenia) from the Danish Research Council for  
58  
59 Strategic Research (grant identification number: 09-067076).  
60 700  
61  
62  
63  
64  
65

701

1  
2  
3  
4  
5  
6  
7  
8  
9  
10  
11  
12  
13  
14  
15  
16  
17  
18  
19  
20  
21  
22  
23  
24  
25  
26  
27  
28  
29  
30  
31  
32  
33  
34  
35  
36  
37  
38  
39  
40  
41  
42  
43  
44  
45  
46  
47  
48  
49  
50  
51  
52  
53  
54  
55  
56  
57  
58  
59  
60  
61  
62  
63  
64  
65

702 Authors' contributions

703 JD, KWS, TW and MHS designed the study. JD performed the transcriptome data analysis  
704 with input from LS and was a major contributor in writing the manuscript. SEL performed  
705 RNA-Seq lab experiment. KWS and JE performed the proteomics experiment and data  
706 analysis. WT interpreted the transcriptome data regarding digestion. All authors read and  
707 approved the final manuscript.

708

709 Acknowledgements

710 We thank Tania A. Nielsen (Aarhus, Denmark) for valuable assistance with RNA purification  
711 and Fasteris SA (Switzerland) for library preparation and Illumina sequencing.

712 **Figure and table legends**

713 **Fig. 1. The workflow of Python RNA-Seq data analysis.** The diagram shows the main  
714 steps and bioinformatics tools used in the study.

715 **Fig. 2. PCA plots of FPKM of 1862 genes.** PC, principal component. PC1 represents 25%,  
716 PC2 represents 18% and PC3 represents 16% of total variation in the data. The name of the  
717 label consist two part, one capital letter plus one number. Letter H, S, I, L, P represent heart,  
718 stomach, intestine, liver and pancreas respectively. Number 0, 1, 2 represent fasting for one  
719 month, 24h/1d after feeding and 48h/2d after feeding respectively.

720 **Fig. 3. Heat maps from hierarchical clustering of DEGs in each tissue.** Heat maps  
721 showing the hierarchically clustered Spearman correlation matrix resulting from comparing  
722 the normalized FPKM value for each pair of genes. Heat map columns represent samples  
723 and rows correspond to genes. Expression values (FPKM) are  $\log_2$ -transformed and then  
724 median-centered by gene. Relative levels of gene expression are represented by colors.  
725 Pale color is low expression and darker blue is high expression. Five sub-clusters labelled a  
726 to e are shown with full annotation in Fig. 4-8.

727 **Fig. 4. The cluster of upregulated genes with NCBI nr annotation in stomach.** It shows  
728 the cluster e in Fig. 3. Heat map columns represent samples and rows correspond to genes.  
729 Expression values (FPKM) are  $\log_2$ -transformed and then median-centered by gene.  
730 Relative levels of gene expression are represented by colors. Pale color is low expression  
731 and darker blue is high expression.

732 **Fig. 5. The cluster of upregulated genes with NCBI nr annotation in intestine.** It shows  
733 the cluster b in Fig. 3. Heat map columns represent samples and rows correspond to genes.  
734 Expression values (FPKM) are  $\log_2$ -transformed and then median-centered by gene.  
735 Relative levels of gene expression are represented by colors. Pale color is low expression  
736 and darker blue is high expression.

737 **Fig. 6. The cluster of upregulated genes with NCBI nr annotation in heart.** It shows the  
738 cluster a in Fig. 3. Heat map columns represent samples and rows correspond to genes.

739 Expression values (FPKM) are  $\log_2$ -transformed and then median-centered by gene.

740 Relative levels of gene expression are represented by colors. Pale color is low expression  
741 and darker blue is high expression.

742 **Fig. 7. The cluster of upregulated genes with NCBI nr annotation in liver.** It shows the  
743 cluster c in Fig. 3. Heat map columns represent samples and rows correspond to genes.

744 Expression values (FPKM) are  $\log_2$ -transformed and then median-centered by gene.

745 Relative levels of gene expression are represented by colors. Pale color is low expression  
746 and darker blue is high expression.

747 **Fig. 8. The cluster of upregulated genes with NCBI nr annotation in pancreas.** It shows  
748 the cluster d in Fig. 3. Heat map columns represent samples and rows correspond to genes.

749 Expression values (FPKM) are  $\log_2$ -transformed and then median-centered by gene.

750 Relative levels of gene expression are represented by colors. Pale color is low expression  
751 and darker blue is high expression.

752 **Fig. 9. The enriched GO terms of target genes in stomach.** Using all 16992 transcripts  
753 annotated with GO terms as reference background, we set (a) 481 upregulated genes and

754 (b) 182 highly expressed genes respectively as test set. The GO terms found over/under  
755 represented by a two-tailed Fisher Exact test with multiple testing correction of FDR

756 (Benjamini and Hochberg) below 0.001. The GO terms are categorized and colored as three  
757 ontology categories: cellular component in green, molecular function in orange and biological  
758 process in black. The pie charts in the left corner display proportion of three categories.

759 **Fig. 10. The enriched GO terms of target genes in intestine.** Using all 16992 transcripts  
760 annotated with GO terms as reference background, we set (a) 689 upregulated genes and

761 (b) 188 highly expressed genes respectively as test set. The GO terms found over/under  
762 represented by a two-tailed Fisher Exact test with multiple testing correction of FDR

763 (Benjamini and Hochberg) below 0.001. The GO terms are categorized and colored as three  
764 ontology categories: cellular component in green, molecular function in orange and biological  
765 process in black. The pie charts in the left corner display proportion of three categories.

766 **Fig. 11. The enriched GO terms of target genes in pancreas.** Using all 16992 transcripts  
1  
2 767 annotated with GO terms as reference background, we set (a) 376 upregulated genes and  
3  
4 768 (b) 205 highly expressed genes respectively as test set. The GO terms found over/under  
5  
6 769 represented by a two-tailed Fisher Exact test with multiple testing correction of FDR  
7  
8  
9 770 (Benjamini and Hochberg) below 0.001. The GO terms are categorized and colored as three  
10  
11 771 ontology categories: cellular component in green, molecular function in orange and biological  
12  
13 772 process in black. The pie charts in the left corner display proportion of three categories.

14  
15 773 **Fig. 12. The enriched GO terms of target genes in liver.** Using all 16992 transcripts  
16  
17 774 annotated with GO terms as reference background, we set (a) 606 upregulated genes and  
18  
19 775 (b) 308 highly expressed genes respectively as test set. The GO terms found over/under  
20  
21 776 represented by a two-tailed Fisher Exact test with multiple testing correction of FDR  
22  
23  
24 777 (Benjamini and Hochberg) below 0.001. The GO terms are categorized and colored as three  
25  
26 778 ontology categories: cellular component in green, molecular function in orange and biological  
27  
28 779 process in black. The pie charts in the left corner display proportion of three categories.

29  
30  
31 780 **Fig. 13. The enriched GO terms of target genes in heart.** Using all 16992 transcripts  
32  
33 781 annotated with GO terms as reference background, we set (a) 107 upregulated genes and  
34  
35 782 (b) 213 highly expressed genes respectively as test set. The GO terms found over/under  
36  
37 783 represented by a two-tailed Fisher Exact test with multiple testing correction of FDR  
38  
39  
40 784 (Benjamini and Hochberg) below 0.001. The GO terms are categorized and colored as three  
41  
42 785 ontology categories: cellular component in green, molecular function in orange and biological  
43  
44 786 process in black. The pie charts in the left corner display proportion of three categories.

45  
46 787 **Fig. 14. The workflow used to identify the python's stomach secretome during**  
47  
48 **digestion. 1)** Initially pythons were feed with mice, or a peptide mixture, and later the gastric  
49 788 juice samples were obtained and mice debris were removed. **2)** The proteins were  
50  
51 789 precipitated, denatured and digested with trypsin. **3)** The resulting tryptic peptides were  
52  
53 790 analyzed by LC-MS/MS analyses and the data merged into a single file. **4)** The file was used  
54  
55 791 to interrogate the in-house generated python protein sequence database (based on the  
56  
57 792 transcriptomic data) and python proteins were identified. **5)** The data was filtered to remove  
58  
59 793

794 mice proteins and plasma proteins. Subsequently, the annotation of the remaining proteins  
1  
2 795 were reassessed and the secretome identified.  
3

4 796 **Fig. 15. Protein sequence alignment of python progastricsin with progastricsin**  
5  
6 797 **sequences from Anolis Carolinensis and from human.** The two longest of the five python  
7  
8 798 protein sequences identified in the gastric juice and annotated as progastricsin-like, were  
9  
10 799 aligned with the two sequences from anole used for the annotation and with the human  
11  
12 800 homolog. The degree of conservation of the individual residues are indicated below the  
13  
14 801 alignment, the active site residues are highlighted in yellow (Asp91, Tyr134, and Asp277 in  
15  
16 802 the human variant – based on MEROPS *the peptidase database*), the cysteine residues are  
17  
18 803 shown in red, and the N-terminal of the activated human gastricsin is highlighted in green.  
19  
20 804 The alignment illustrates that the python’s most abundant proteolytic digestive enzymes, the  
21  
22 805 gastricsins, are similar to gastricsins from other species.  
23  
24  
25

26 806 **Fig. 16. Cartoon depiction of colored KEGG pathway of gastric acid secretion in**  
27  
28 807 **stomach.** Entry in red represents upregulated during digestion; Entry in purple for highly  
29  
30 808 expressed. H/K is H+/K+-exchanging ATPase alpha polypeptide. CA is carbonic anhydrase.  
31  
32 809 AE is solute carrier family 26 (anion exchange transporter).  
33  
34

35 810 **Table 1. Summary of transcriptome assembly of Burmese Python.**

36 811 **Table 2. Color coding of genes in KEGG pathway maps.** Three criteria are used to  
37  
38 812 classify and color genes. First, i) whether the maximum FPKM of the gene among fasting,  
39  
40 813 24h and 48h is over 10, then ii) whether the gene is differential expressed in at least one of  
41  
42 814 the pairwise comparison among fasting, 24h and 48h with FC over 4. Finally, iii) for those  
43  
44 815 genes expressed, but not differential expressed, whether it is highly expressed with  
45  
46 816 maximum FPKM among three time points over 200. The term expression trend indicates the  
47  
48 817 trend of gene expression across fasting, 24h and 48h. e.g. The trend up means the gene is  
49  
50 818 upregulated from either fasting to 24h, fasting to 48h or 24h to 48h. The trend up-then-down  
51  
52 819 means the gene is firstly upregulated from fasting to 24h, then downregulated from 24h to  
53  
54 820 48h.  
55  
56  
57  
58  
59  
60  
61  
62  
63  
64  
65



1  
2  
3  
4  
5  
6  
7  
8  
9  
10  
11  
12  
13  
14  
15  
16  
17  
18  
19  
20  
21  
22  
23  
24  
25  
26  
27  
28  
29  
30  
31  
32  
33  
34  
35  
36  
37  
38  
39  
40  
41  
42  
43  
44  
45  
46  
47  
48  
49  
50  
51  
52  
53  
54  
55  
56  
57  
58  
59  
60  
61  
62  
63  
64  
65

821 **Table 3. The number of DEGs across fasting, 24h and 48h in each tissue.** The  
822 expression trend is consistent with definition in Table 2.

823 **Table 4. Upregulated genes and highly expressed genes respectively involved in three**  
824 **KEGG pathways for each tissue.** Three pathways are glycolysis/gluconeogenesis, citrate  
825 cycle (TCA cycle), and oxidative phosphorylation. The number within bracket after gene  
826 description is the corresponding gene ID in NCBI database.

827 **Table 5. Upregulated genes and highly expressed genes respectively involved in two**  
828 **categories of KEGG pathways for each tissue.** The two categories are 1.3 lipid  
829 metabolism and 1.5 amino acid metabolism in KEGG pathway database. The number within  
830 bracket after gene description is the corresponding gene ID in NCBI database.

831 **Reference**

- 1
- 2
- 3
- 4 832 1. Secor SM, Diamond J: **A vertebrate model of extreme physiological regulation.**
- 5 833 *Nature* 1998, **395**:659-662.
- 6 834 2. Cox CL, Secor SM: **Matched regulation of gastrointestinal performance in the**
- 7 835 **Burmese python, *Python molurus*.** *J Exp Biol* 2008, **211**:1131-1140.
- 8 836 3. Secor SM, Diamond J: **Adaptive responses to feeding in Burmese pythons: pay**
- 9 837 **before pumping.** *J Exp Biol* 1995, **198**:1313-1325.
- 10 838 4. Secor SM, Diamond JM: **Evolution of regulatory responses to feeding in snakes.**
- 11 839 *Physiological and Biochemical Zoology* 2000, **73**:123-141.
- 12 840 5. Aubret F, Shine R, Bonnet X: **Evolutionary biology: adaptive developmental**
- 13 841 **plasticity in snakes.** *Nature* 2004, **431**:261-262.
- 14 842 6. Cohn MJ, Tickle C: **Developmental basis of limblessness and axial patterning**
- 15 843 **in snakes.** *Nature* 1999, **399**:474-479.
- 16 844 7. Ott BD, Secor SM: **Adaptive regulation of digestive performance in the genus**
- 17 845 ***Python*.** *J Exp Biol* 2007, **210**:340-356.
- 18 846 8. Secor SM: **Digestive physiology of the Burmese python: broad regulation of**
- 19 847 **integrated performance.** *J Exp Biol* 2008, **211**:3767-3774.
- 20 848 9. Zaar M, Overgaard J, Gesser H, Wang T: **Contractile properties of the**
- 21 849 **functionally divided python heart: two sides of the same matter.** *Comp*
- 22 850 *Biochem Physiol A Mol Integr Physiol* 2007, **146**:163-173.
- 23 851 10. Andersen JB, Rourke BC, Caiozzo VJ, Bennett AF, Hicks JW: **Physiology:**
- 24 852 **postprandial cardiac hypertrophy in pythons.** *Nature* 2005, **434**:37-38.
- 25 853 11. Vidal N, Hedges SB: **Molecular evidence for a terrestrial origin of snakes.** *Proc*
- 26 854 *Biol Sci* 2004, **271 Suppl 4**:S226-229.
- 27 855 12. Castoe TA, de Koning AP, Hall KT, Card DC, Schield DR, Fujita MK, Ruggiero RP,
- 28 856 Degner JF, Daza JM, Gu W, et al: **The Burmese python genome reveals the**
- 29 857 **molecular basis for extreme adaptation in snakes.** *Proc Natl Acad Sci U S A*
- 30 858 2013, **110**:20645-20650.
- 31 859 13. Andrew AL, Card DC, Ruggiero RP, Schield DR, Adams RH, Pollock DD, Secor SM,
- 32 860 Castoe TA: **Rapid changes in gene expression direct rapid shifts in intestinal**
- 33 861 **form and function in the Burmese python after feeding.** *Physiol Genomics*
- 34 862 2015, **47**:147-157.
- 35 863 14. Castoe TA, Fox SE, Jason de Koning A, Poole AW, Daza JM, Smith EN, Mockler TC,
- 36 864 Secor SM, Pollock DD: **A multi-organ transcriptome resource for the**
- 37 865 **Burmese Python (*Python molurus bivittatus*).** *BMC Res Notes* 2011, **4**:310.
- 38 866 15. Wang Z, Gerstein M, Snyder M: **RNA-Seq: a revolutionary tool for**
- 39 867 **transcriptomics.** *Nat Rev Genet* 2009, **10**:57-63.
- 40 868 16. Mortazavi A, Williams BA, McCue K, Schaeffer L, Wold B: **Mapping and**
- 41 869 **quantifying mammalian transcriptomes by RNA-Seq.** *Nat Methods* 2008,
- 42 870 **5**:621-628.
- 43 871 17. Zerbino DR, Birney E: **Velvet: algorithms for de novo short read assembly**
- 44 872 **using de Bruijn graphs.** *Genome Res* 2008, **18**:821-829.
- 45 873 18. Simão FA, Waterhouse RM, Ioannidis P, Kriventseva EV, Zdobnov EM: **BUSCO:**
- 46 874 **assessing genome assembly and annotation completeness with single-copy**
- 47 875 **orthologs.** *Bioinformatics* 2015:btv351.
- 48 876 19. Pruitt KD, Tatusova T, Maglott DR: **NCBI reference sequences (RefSeq): a**
- 49 877 **curated non-redundant sequence database of genomes, transcripts and**
- 50
- 51
- 52
- 53
- 54
- 55
- 56
- 57
- 58
- 59
- 60
- 61
- 62
- 63
- 64
- 65

- 878 **proteins. *Nucleic Acids Res* 2007, 35:D61-65.**
- 1 879 20. Benton MJ: **Phylogeny of the major tetrapod groups: morphological data and**  
2 880 **divergence dates. *J Mol Evol* 1990, 30:409-424.**
- 3 881 21. Conesa A, Gotz S, Garcia-Gomez JM, Terol J, Talon M, Robles M: **Blast2GO: a**  
4 882 **universal tool for annotation, visualization and analysis in functional**  
5 883 **genomics research. *Bioinformatics* 2005, 21:3674-3676.**
- 6 884 22. Hunter S, Apweiler R, Attwood TK, Bairoch A, Bateman A, Binns D, Bork P, Das U,  
7 885 Daugherty L, Duquenne L, et al: **InterPro: the integrative protein signature**  
8 886 **database. *Nucleic Acids Res* 2009, 37:D211-215.**
- 9 887 23. Trapnell C, Williams BA, Pertea G, Mortazavi A, Kwan G, van Baren MJ, Salzberg SL,  
10 888 Wold BJ, Pachter L: **Transcript assembly and quantification by RNA-Seq**  
11 889 **reveals unannotated transcripts and isoform switching during cell**  
12 890 **differentiation. *Nat Biotechnol* 2010, 28:511-515.**
- 13 891 24. Fan HP, Di Liao C, Fu BY, Lam LC, Tang NL: **Interindividual and interethnic**  
14 892 **variation in genomewide gene expression: insights into the biological**  
15 893 **variation of gene expression and clinical implications. *Clin Chem* 2009,**  
16 894 **55:774-785.**
- 17 895 25. Kanehisa M, Goto S, Sato Y, Furumichi M, Tanabe M: **KEGG for integration and**  
18 896 **interpretation of large-scale molecular data sets. *Nucleic Acids Res* 2012,**  
19 897 **40:D109-114.**
- 20 898 26. Kanehisa M, Goto S: **KEGG: kyoto encyclopedia of genes and genomes. *Nucleic***  
21 899 ***Acids Res* 2000, 28:27-30.**
- 22 900 27. Kageyama T: **Pepsinogens, progastricsins, and prochymosins: structure,**  
23 901 **function, evolution, and development. *Cell Mol Life Sci* 2002, 59:288-306.**
- 24 902 28. Hayashi K, Agata K, Mochii M, Yasugi S, Eguchi G, Mizuno T: **Molecular cloning**  
25 903 **and the nucleotide sequence of cDNA for embryonic chicken pepsinogen:**  
26 904 **phylogenetic relationship with prochymosin. *J Biochem* 1988, 103:290-296.**
- 27 905 29. Watanuki K, Yasugi S: **Analysis of transcription regulatory regions of**  
28 906 **embryonic chicken pepsinogen (ECPg) gene. *Dev Dyn* 2003, 228:51-58.**
- 29 907 30. Aoki N, Deshimaru M, Terada S: **Active fragments of the antihemorrhagic**  
30 908 **protein HSF from serum of habu (*Trimeresurus flavoviridis*). *Toxicon* 2007,**  
31 909 **49:653-662.**
- 32 910 31. Perales J, Neves-Ferreira AG, Valente RH, Domont GB: **Natural inhibitors of**  
33 911 **snake venom hemorrhagic metalloproteinases. *Toxicon* 2005, 45:1013-1020.**
- 34 912 32. Tomihara Y, Yonaha K, Nozaki M, Yamakawa M, Kawamura Y, Kamura T, Toyama  
35 913 S: **Purification of an antihemorrhagic factor from the serum of the non-**  
36 914 **venomous snake *Dinodon semicarinatus*. *Toxicon* 1988, 26:420-423.**
- 37 915 33. Lee HJ, Sorimachi H, Jeong SY, Ishiura S, Suzuki K: **Molecular cloning and**  
38 916 **characterization of a novel tissue-specific calpain predominantly**  
39 917 **expressed in the digestive tract. *Biol Chem* 1998, 379:175-183.**
- 40 918 34. Secor SM: **Gastric function and its contribution to the postprandial metabolic**  
41 919 **response of the Burmese python *Python molurus*. *Journal of Experimental***  
42 920 ***Biology* 2003, 206:1621-1630.**
- 43 921 35. Bessler SM, Secor SM: **Effects of feeding on luminal pH and morphology of the**  
44 922 **gastroesophageal junction of snakes. *Zoology (Jena)* 2012, 115:319-329.**
- 45 923 36. Helmstetter C, Pope RK, T'Flachebba M, Secor SM, Lignot J-H: **The effects of**  
46 924 **feeding on cell morphology and proliferation of the gastrointestinal tract of**  
47 925 **juvenile Burmese pythons (*Python molurus*). *Canadian Journal of Zoology***  
48 926 **2009, 87:1255-1267.**

- 927 37. Enok S, Simonsen LS, Wang T: **The contribution of gastric digestion and**  
1 928 **ingestion of amino acids on the postprandial rise in oxygen consumption,**  
2 929 **heart rate and growth of visceral organs in pythons.** *Comp Biochem Physiol A*  
3 930 *Mol Integr Physiol* 2013, **165**:46-53.
- 5 931 38. Nørgaard S, Andreassen K, Malte CL, Enok S, Wang T: **Low cost of gastric acid**  
6 932 **secretion during digestion in ball pythons.** *Comparative Biochemistry and*  
7 933 *Physiology Part A: Molecular & Integrative Physiology* 2016, **194**:62-66.
- 8 934 39. Secor SM, Taylor JR, Grosell M: **Selected regulation of gastrointestinal acid-**  
9 935 **base secretion and tissue metabolism for the diamondback water snake**  
10 936 **and Burmese python.** *J Exp Biol* 2012, **215**:185-196.
- 12 937 40. Andrade DV, De Toledo LF, Abe AS, Wang T: **Ventilatory compensation of the**  
13 938 **alkaline tide during digestion in the snake Boa constrictor.** *J Exp Biol* 2004,  
14 939 **207**:1379-1385.
- 16 940 41. Koelz HR: **Gastric acid in vertebrates.** *Scand J Gastroenterol Suppl* 1992, **193**:2-6.
- 17 941 42. Starck JM, Beese K: **Structural flexibility of the intestine of Burmese python in**  
18 942 **response to feeding.** *Journal of Experimental Biology* 2001, **204**:325-335.
- 19 943 43. Holmberg A, Kaim J, Persson A, Jensen J, Wang T, Holmgren S: **Effects of digestive**  
20 944 **status on the reptilian gut.** *Comparative Biochemistry and Physiology a-*  
21 945 *Molecular and Integrative Physiology* 2002, **133**:499-518.
- 22 946 44. Lignot JH, Helmstetter C, Secor SM: **Postprandial morphological response of**  
23 947 **the intestinal epithelium of the Burmese python (Python molurus).** *Comp*  
24 948 *Biochem Physiol A Mol Integr Physiol* 2005, **141**:280-291.
- 25 949 45. Secor SM, Whang EE, Lane JS, Ashley SW, Diamond J: **Luminal and systemic**  
26 950 **signals trigger intestinal adaptation in the juvenile python.** *American Journal*  
27 951 *of Physiology-Gastrointestinal and Liver Physiology* 2000, **279**:G1177-G1187.
- 28 952 46. Overgaard J, Andersen JB, Wang T: **The effects of fasting duration on the**  
29 953 **metabolic response to feeding in Python molurus: an evaluation of the**  
30 954 **energetic costs associated with gastrointestinal growth and upregulation.**  
31 955 *Physiol Biochem Zool* 2002, **75**:360-368.
- 32 956 47. Wang T, Hung CC, Randall DJ: **The comparative physiology of food deprivation:**  
33 957 **from feast to famine.** *Annu Rev Physiol* 2006, **68**:223-251.
- 34 958 48. Secor SM, White SE: **Prioritizing blood flow: cardiovascular performance in**  
35 959 **response to the competing demands of locomotion and digestion for the**  
36 960 **Burmese python, Python molurus.** *J Exp Biol* 2010, **213**:78-88.
- 37 961 49. Secor SM, Hicks JW, Bennett AF: **Ventilatory and cardiovascular responses of a**  
38 962 **python (Python molurus) to exercise and digestion.** *J Exp Biol* 2000,  
39 963 **203**:2447-2454.
- 40 964 50. Skovgaard N, Møller K, Gesser H, Wang T: **Histamine induces postprandial**  
41 965 **tachycardia through a direct effect on cardiac H2-receptors in pythons.**  
42 966 *American Journal of Physiology - Regulatory, Integrative and Comparative*  
43 967 *Physiology* 2009, **296**:R774-R785.
- 44 968 51. Enok S, Simonsen LS, Pedersen SV, Wang T, Skovgaard N: **Humoral regulation of**  
45 969 **heart rate during digestion in pythons (Python molurus and Python**  
46 970 **regius).** *Am J Physiol Regul Integr Comp Physiol* 2012, **302**:R1176-1183.
- 47 971 52. Riquelme CA, Magida JA, Harrison BC, Wall CE, Marr TG, Secor SM, Leinwand LA:  
48 972 **Fatty acids identified in the Burmese python promote beneficial cardiac**  
49 973 **growth.** *Science* 2011, **334**:528-531.
- 50 974 53. Enok S, Leite G, Leite C, Gesser H, Hedrick MS, Wang T: **Improved cardiac filling**  
51 975 **facilitates the postprandial elevation of stroke volume in Python regius.** *J*

976 *Exp Biol* 2016.

1 977 54. Slay CE, Enok S, Hicks JW, Wang T: **Reduction of blood oxygen levels enhances**  
2 978 **postprandial cardiac hypertrophy in Burmese python (*Python bivittatus*).** *J*  
3 979 *Exp Biol* 2014, **217**:1784-1789.

5 980 55. Jensen B, Larsen CK, Nielsen JM, Simonsen LS, Wang T: **Change of cardiac**  
6 981 **function, but not form, in postprandial pythons.** *Comp Biochem Physiol A Mol*  
7 982 *Integr Physiol* 2011, **160**:35-42.

9 983 56. Butler MW, Lutz TJ, Fokidis HB, Stahlschmidt ZR: **Eating increases oxidative**  
10 984 **damage in a reptile.** *J Exp Biol* 2016, **219**:1969-1973.

11 985 57. Schulz MH, Zerbino DR, Vingron M, Birney E: **Oases: robust de novo RNA-seq**  
12 986 **assembly across the dynamic range of expression levels.** *Bioinformatics*  
13 987 2012, **28**:1086-1092.

15 988 58. Altschul SF, Gish W, Miller W, Myers EW, Lipman DJ: **Basic local alignment**  
16 989 **search tool.** *J Mol Biol* 1990, **215**:403-410.

17 990 59. Wu TD, Watanabe CK: **GMAP: a genomic mapping and alignment program for**  
18 991 **mRNA and EST sequences.** *Bioinformatics* 2005, **21**:1859-1875.

20 992 60. Camacho C, Coulouris G, Avagyan V, Ma N, Papadopoulos J, Bealer K, Madden TL:  
21 993 **BLAST+: architecture and applications.** *BMC Bioinformatics* 2009, **10**:421.

22 994 61. Eddy SR: **A probabilistic model of local sequence alignment that simplifies**  
23 995 **statistical significance estimation.** *PLoS Comput Biol* 2008, **4**:e1000069.

25 996 62. Notredame C, Higgins DG, Heringa J: **T-Coffee: A novel method for fast and**  
26 997 **accurate multiple sequence alignment.** *Journal of molecular biology* 2000,  
27 998 **302**:205-217.

28 999 63. Langmead B, Salzberg SL: **Fast gapped-read alignment with Bowtie 2.** *Nat*  
29 1000 *Methods* 2012, **9**:357-359.

31 1001 64. Li B, Dewey CN: **RSEM: accurate transcript quantification from RNA-Seq data**  
32 1002 **with or without a reference genome.** *BMC Bioinformatics* 2011, **12**:323.

33 1003 65. Xie C, Mao X, Huang J, Ding Y, Wu J, Dong S, Kong L, Gao G, Li CY, Wei L: **KOBAS**  
34 1004 **2.0: a web server for annotation and identification of enriched pathways**  
35 1005 **and diseases.** *Nucleic Acids Res* 2011, **39**:W316-322.

37 1006 66. Perkins DN, Pappin DJC, Creasy DM, Cottrell JS: **Probability-based protein**  
38 1007 **identification by searching sequence databases using mass spectrometry**  
39 1008 **data.** *Electrophoresis* 1999, **20**:3551-3567.

41 1009 67. Dyrland TF, Poulsen ET, Scavenius C, Sanggaard KW, Enghild JJ: **MS Data Miner: A**  
42 1010 **web-based software tool to analyze, compare, and share mass**  
43 1011 **spectrometry protein identifications.** *Proteomics* 2012, **12**:2792-2796.  
44 1012  
45 1013

| <b>Parameter</b>                   | <b><i>De novo</i> assembly</b> |
|------------------------------------|--------------------------------|
| Total transcripts                  | 34,423                         |
| Annotated transcripts with nr NCBI | 19,713                         |
| Annotated transcripts with GO term | 16,992                         |
| Minimum transcript size (nt)       | 100                            |
| Medium transcript size (nt)        | 605                            |
| Mean transcript size (nt)          | 1,034                          |
| Largest transcript (nt)            | 26,010                         |
| N50                                | 6,240                          |
| N50 size (nt)                      | 1,673                          |
| Total assembled bases (Mb)         | 35.6                           |

| Expression level  | Fold change level | Expression trend<br>(fasting -> 24h -> 48h)  | Color code |
|-------------------|-------------------|----------------------------------------------|------------|
| max FPKM over 10  | FC over 4         | Up-regulated                                 | Red        |
|                   |                   | Down-regulated                               | Blue       |
|                   |                   | Up-then-down regulated                       | Yellow     |
|                   |                   | Down-then-up regulated                       | Brown      |
|                   | FC below 4        | Highly expressed<br>(max FPKM over 200)      | Purple     |
|                   |                   | Moderately expressed (max<br>FPKM below 200) | Pink       |
| max FPKM below 10 | -                 | Lowly expressed                              | Darkgrey   |

| Expression trend<br>(fasting -> 24h -> 48h) | Stomach        | Intestine      | Pancreas       | Liver          | Heart          |
|---------------------------------------------|----------------|----------------|----------------|----------------|----------------|
| Up-regulated                                | 932 (2.9%)     | 1,131 (3.5%)   | 859 (2.6%)     | 1,047 (3.2%)   | 184 (0.6%)     |
| Up-then-down regulated                      | 28 (0.1%)      | 31 (0.1%)      | 150 (0.5%)     | 61 (0.2%)      | 6 (0.0%)       |
| Down-regulated                              | 869 (2.7%)     | 625 (1.9%)     | 567 (1.7%)     | 618 (1.9%)     | 168 (0.5%)     |
| Down-then-up regulated                      | 36 (0.1%)      | 45 (0.1%)      | 127 (0.4%)     | 90 (0.3%)      | 16 (0.1%)      |
| Highly expressed                            | 199 (0.6%)     | 211 (0.7%)     | 225 (0.7%)     | 354 (1.1%)     | 232 (0.7%)     |
| Moderately expressed                        | 5,541 (17.0%)  | 5,582 (17.2%)  | 4,933 (15.2%)  | 5,385 (16.5%)  | 6,044 (18.6%)  |
| Lowly expressed                             | 24,926 (76.6%) | 24,906 (76.5%) | 25,670 (78.9%) | 24,976 (76.8%) | 25,881 (79.5%) |
| <b>Total</b>                                | 32,531 (100%)  | 32,531 (100%)  | 32,531 (100%)  | 32,531 (100%)  | 32,531 (100%)  |



| Upregulated Genes |                                                                                                                                                                                                                                                                                                                                                                            |                                                                                                                                                                                                                                       |                                                                                                                                                                                                                                                                                                                                                                                                                                                                                                                                                                                                                                                                                                                                                                                                                                                                                                                                                                                                                                                                                                                                                                               |
|-------------------|----------------------------------------------------------------------------------------------------------------------------------------------------------------------------------------------------------------------------------------------------------------------------------------------------------------------------------------------------------------------------|---------------------------------------------------------------------------------------------------------------------------------------------------------------------------------------------------------------------------------------|-------------------------------------------------------------------------------------------------------------------------------------------------------------------------------------------------------------------------------------------------------------------------------------------------------------------------------------------------------------------------------------------------------------------------------------------------------------------------------------------------------------------------------------------------------------------------------------------------------------------------------------------------------------------------------------------------------------------------------------------------------------------------------------------------------------------------------------------------------------------------------------------------------------------------------------------------------------------------------------------------------------------------------------------------------------------------------------------------------------------------------------------------------------------------------|
| Organ             | Glycolysis / Gluconeogenesis                                                                                                                                                                                                                                                                                                                                               | Citrate cycle (TCA cycle)                                                                                                                                                                                                             | Oxidative phosphorylation                                                                                                                                                                                                                                                                                                                                                                                                                                                                                                                                                                                                                                                                                                                                                                                                                                                                                                                                                                                                                                                                                                                                                     |
| Stomach           | <p>phosphofructokinase, liver (5211)</p> <p>pyruvate dehydrogenase (lipoamide) beta (5162)</p> <p>alcohol dehydrogenase 7 (class IV), mu or sigma polypeptide (131)</p> <p>hexokinase 2 (3099)</p> <p>aldehyde dehydrogenase 9 family member A1 (223)</p> <p>alcohol dehydrogenase 5 (class III), chi polypeptide (128)</p>                                                | <p>ATP citrate lyase (47)</p> <p>isocitrate dehydrogenase 1 (NADP+) (3417)</p> <p>succinate dehydrogenase complex subunit A, flavoprotein (Fp) (6389)</p> <p>pyruvate dehydrogenase (lipoamide) beta (5162)</p>                       | <p>ubiquinol-cytochrome c reductase, Rieske iron-sulfur polypeptide 1 (7386)</p> <p>ubiquinol-cytochrome c reductase core protein I (7384)</p> <p>succinate dehydrogenase complex subunit A, flavoprotein (Fp) (6389)</p> <p>NADH:ubiquinone oxidoreductase subunit S6 (4726)</p> <p>NADH:ubiquinone oxidoreductase subunit B9 (4715)</p> <p>NADH:ubiquinone oxidoreductase subunit A5 (4698)</p> <p>NADH:ubiquinone oxidoreductase subunit A10 (4705)</p> <p>NADH:ubiquinone oxidoreductase core subunit V2 (4729)</p> <p>cytochrome c oxidase assembly homolog 15 (yeast) (1355)</p> <p>COX11 cytochrome c oxidase copper chaperone (1353)</p> <p>ATPase, H+ transporting, lysosomal 34kDa, V1 subunit D (51382)</p> <p>ATP synthase, H+ transporting, mitochondrial Fo complex subunit B1 (515)</p> <p>ATP synthase, H+ transporting, mitochondrial F1 complex, O subunit (539)</p> <p>ATP synthase, H+ transporting, mitochondrial F1 complex, gamma polypeptide 1 (509)</p> <p>ATP synthase, H+ transporting, mitochondrial F1 complex, beta polypeptide (506)</p> <p>ATP synthase, H+ transporting, mitochondrial F1 complex, alpha subunit 1, cardiac muscle (498)</p> |
| Intestine         | <p>alcohol dehydrogenase 7 (class IV), mu or sigma polypeptide (131)</p> <p>acyl-CoA synthetase short-chain family member 2 (55902)</p> <p>ADP-dependent glucokinase (83440)</p> <p>aldehyde dehydrogenase 9 family member A1 (223)</p> <p>phosphoenolpyruvate carboxykinase 1 (5105)</p> <p>hexokinase 2 (3099)</p> <p>pyruvate dehydrogenase (lipoamide) beta (5162)</p> | <p>pyruvate dehydrogenase (lipoamide) beta (5162)</p> <p>oxoglutarate dehydrogenase-like (55753)</p> <p>phosphoenolpyruvate carboxykinase 1 (5105)</p> <p>ATP citrate lyase (47)</p> <p>isocitrate dehydrogenase 1 (NADP+) (3417)</p> | <p>ATPase, H+ transporting, lysosomal 70kDa, V1 subunit A (523)</p> <p>ATPase, H+ transporting, lysosomal 34kDa, V1 subunit D (51382)</p> <p>ATP synthase, H+ transporting, mitochondrial F1 complex, O subunit (539)</p> <p>NADH:ubiquinone oxidoreductase subunit B9 (4715)</p>                                                                                                                                                                                                                                                                                                                                                                                                                                                                                                                                                                                                                                                                                                                                                                                                                                                                                             |
| Intestine         | <p>aldehyde dehydrogenase 9 family member A1 (223)</p>                                                                                                                                                                                                                                                                                                                     | <p>isocitrate dehydrogenase 1 (NADP+) (3417)</p>                                                                                                                                                                                      | <p>ubiquinol-cytochrome c reductase, Rieske iron-sulfur polypeptide 1 (7386)</p> <p>ATPase, H+ transporting, lysosomal accessory protein 1 (537)</p>                                                                                                                                                                                                                                                                                                                                                                                                                                                                                                                                                                                                                                                                                                                                                                                                                                                                                                                                                                                                                          |

|          |                                                                   |                                                |                                                                  |
|----------|-------------------------------------------------------------------|------------------------------------------------|------------------------------------------------------------------|
| Pancreas |                                                                   |                                                | ATPase, H+ transporting, lysosomal 70kDa, V1 subunit A (523)     |
|          | alcohol dehydrogenase 1C (class I), gamma polypeptide (126)       | isocitrate dehydrogenase 1 (NADP+) (3417)      | ATPase, H+ transporting, lysosomal 70kDa, V1 subunit A (523)     |
|          | alcohol dehydrogenase 5 (class III), chi polypeptide (128)        | pyruvate dehydrogenase (lipoamide) beta (5162) | ATPase, H+ transporting, lysosomal 56/58kDa, V1 subunit B2 (526) |
|          | acyl-CoA synthetase short-chain family member 2 (55902)           | aconitase 1 (48)                               |                                                                  |
|          | phosphoglycerate mutase 1 (5223)                                  |                                                |                                                                  |
|          | enolase 1, (alpha) (2023)                                         |                                                |                                                                  |
|          | aldehyde dehydrogenase 2 family (mitochondrial) (217)             |                                                |                                                                  |
|          | aldehyde dehydrogenase 9 family member A1 (223)                   |                                                |                                                                  |
|          | aldolase, fructose-bisphosphate B (229)                           |                                                |                                                                  |
|          | pyruvate dehydrogenase (lipoamide) beta (5162)                    |                                                |                                                                  |
|          | alcohol dehydrogenase 7 (class IV), mu or sigma polypeptide (131) |                                                |                                                                  |
| Liver    |                                                                   |                                                |                                                                  |
| Heart    | aldolase, fructose-bisphosphate B (229)                           | isocitrate dehydrogenase 1 (NADP+) (3417)      |                                                                  |

| Highly expressed genes |                                                                                                                                                                                                                                                             |                                                                                                                                           |                                                                                                                                                                                                                                                                                                                                                                                                                                                                                                               |
|------------------------|-------------------------------------------------------------------------------------------------------------------------------------------------------------------------------------------------------------------------------------------------------------|-------------------------------------------------------------------------------------------------------------------------------------------|---------------------------------------------------------------------------------------------------------------------------------------------------------------------------------------------------------------------------------------------------------------------------------------------------------------------------------------------------------------------------------------------------------------------------------------------------------------------------------------------------------------|
| Organ                  | Glycolysis / Gluconeogenesis                                                                                                                                                                                                                                | Citrate cycle (TCA cycle)                                                                                                                 | Oxidative phosphorylation                                                                                                                                                                                                                                                                                                                                                                                                                                                                                     |
| Stomach                | <p>glyceraldehyde-3-phosphate dehydrogenase (2597)</p> <p>pyruvate kinase, muscle (5315)</p>                                                                                                                                                                | <p>isocitrate dehydrogenase 2 (NADP+), mitochondrial (3418)</p> <p>malate dehydrogenase 1 (4190)</p>                                      | <p>ATP synthase, H+ transporting, mitochondrial Fo complex subunit C3 (subunit 9) (518)</p> <p>ATPase, H+/K+ exchanging, alpha polypeptide (495)</p> <p>ATPase, H+/K+ exchanging, beta polypeptide (496)</p> <p>cytochrome c oxidase subunit I (4512)</p> <p>cytochrome c oxidase subunit IV isoform 1 (1327)</p> <p>cytochrome c1 (1537)</p> <p>NADH dehydrogenase, subunit 1 (complex I) (4535)</p>                                                                                                         |
| Intestine              | <p>aldolase, fructose-bisphosphate B (229)</p> <p>enolase 1, (alpha) (2023)</p> <p>aldehyde dehydrogenase 2 family (mitochondrial) (217)</p> <p>glyceraldehyde-3-phosphate dehydrogenase (2597)</p>                                                         | <p>malate dehydrogenase 1 (4190)</p>                                                                                                      | <p>ATP synthase, H+ transporting, mitochondrial F1 complex, alpha subunit 1, cardiac muscle (498)</p> <p>ATP synthase, H+ transporting, mitochondrial F1 complex, beta polypeptide (506)</p> <p>NADH dehydrogenase, subunit 1 (complex I) (4535)</p> <p>cytochrome c oxidase subunit I (4512)</p> <p>ATP synthase, H+ transporting, mitochondrial Fo complex subunit C3 (subunit 9) (518)</p> <p>cytochrome c oxidase subunit IV isoform 1 (1327)</p>                                                         |
| Pancreas               | <p>glucose-6-phosphate isomerase (2821)</p> <p>glyceraldehyde-3-phosphate dehydrogenase (2597)</p>                                                                                                                                                          |                                                                                                                                           | <p>ATP synthase, H+ transporting, mitochondrial F1 complex, beta polypeptide (506)</p> <p>NADH:ubiquinone oxidoreductase subunit A5 (4698)</p> <p>ATP synthase, H+ transporting, mitochondrial F1 complex, alpha subunit 1, cardiac muscle (498)</p> <p>ATP synthase, H+ transporting, mitochondrial Fo complex subunit C3 (subunit 9) (518)</p> <p>cytochrome c oxidase subunit I (4512)</p> <p>NADH dehydrogenase, subunit 1 (complex I) (4535)</p> <p>cytochrome c oxidase subunit IV isoform 1 (1327)</p> |
|                        | <p>fructose-bisphosphatase 1 (2203)</p> <p>phosphoglycerate kinase 1 (5230)</p> <p>glyceraldehyde-3-phosphate dehydrogenase (2597)</p> <p>lactate dehydrogenase B (3945)</p> <p>triosephosphate isomerase 1 (7167)</p> <p>phosphoglucosmutase 2 (55276)</p> | <p>malate dehydrogenase 1 (4190)</p> <p>isocitrate dehydrogenase 2 (NADP+), mitochondrial (3418)</p> <p>malate dehydrogenase 2 (4191)</p> | <p>ATP synthase, H+ transporting, mitochondrial Fo complex subunit C3 (subunit 9) (518)</p> <p>ATP synthase, H+ transporting, mitochondrial F1 complex, gamma polypeptide 1 (509)</p> <p>NADH dehydrogenase, subunit 1 (complex I) (4535)</p> <p>cytochrome c oxidase subunit I (4512)</p> <p>cytochrome c oxidase subunit IV isoform 1 (1327)</p> <p>ATP synthase, H+ transporting, mitochondrial F1 complex, beta polypeptide (506)</p>                                                                     |

|       |                                                                                                                                                                                                                                                                                                                                                                                                            |                                                                                                                                                                                                                                                                                                                        |                                                                                                                                                                                                                                                                                                                                                                                                                                                                                                                                                                                                                                                                                                                                                                                                                                                                                                                                                                                                                                                                                                                                                                                                                                                                                                                                                                                                                                                                  |
|-------|------------------------------------------------------------------------------------------------------------------------------------------------------------------------------------------------------------------------------------------------------------------------------------------------------------------------------------------------------------------------------------------------------------|------------------------------------------------------------------------------------------------------------------------------------------------------------------------------------------------------------------------------------------------------------------------------------------------------------------------|------------------------------------------------------------------------------------------------------------------------------------------------------------------------------------------------------------------------------------------------------------------------------------------------------------------------------------------------------------------------------------------------------------------------------------------------------------------------------------------------------------------------------------------------------------------------------------------------------------------------------------------------------------------------------------------------------------------------------------------------------------------------------------------------------------------------------------------------------------------------------------------------------------------------------------------------------------------------------------------------------------------------------------------------------------------------------------------------------------------------------------------------------------------------------------------------------------------------------------------------------------------------------------------------------------------------------------------------------------------------------------------------------------------------------------------------------------------|
| Liver | glucose-6-phosphate isomerase (2821)                                                                                                                                                                                                                                                                                                                                                                       |                                                                                                                                                                                                                                                                                                                        | ATP synthase, H+ transporting, mitochondrial F1 complex, alpha subunit 1, cardiac muscle (498)<br>ubiquinol-cytochrome c reductase, Rieske iron-sulfur polypeptide 1 (7386)<br>cytochrome c1 (1537)                                                                                                                                                                                                                                                                                                                                                                                                                                                                                                                                                                                                                                                                                                                                                                                                                                                                                                                                                                                                                                                                                                                                                                                                                                                              |
| Heart | <p>pyruvate kinase, muscle (5315)</p> <p>glyceraldehyde-3-phosphate dehydrogenase (2597)</p> <p>triosephosphate isomerase 1 (7167)</p> <p>enolase 2 (gamma, neuronal) (2026)</p> <p>glucose-6-phosphate isomerase (2821)</p> <p>phosphoglycerate mutase 2 (5224)</p> <p>aldolase, fructose-bisphosphate C (230)</p> <p>phosphoglycerate kinase 1 (5230)</p> <p>aldolase, fructose-bisphosphate A (226)</p> | <p>succinate dehydrogenase complex subunit A, flavoprotein (Fp) (6389)</p> <p>succinate dehydrogenase complex subunit B, iron sulfur (lp) (6390)</p> <p>isocitrate dehydrogenase 2 (NADP+), mitochondrial (3418)</p> <p>malate dehydrogenase 2 (4191)</p> <p>aconitase 2 (50)</p> <p>malate dehydrogenase 1 (4190)</p> | <p>NADH:ubiquinone oxidoreductase subunit A5 (4698)</p> <p>succinate dehydrogenase complex subunit B, iron sulfur (lp) (6390)</p> <p>cytochrome c oxidase subunit IV isoform 1 (1327)</p> <p>succinate dehydrogenase complex subunit A, flavoprotein (Fp) (6389)</p> <p>NADH:ubiquinone oxidoreductase subunit A8 (4702)</p> <p>NADH:ubiquinone oxidoreductase subunit A10 (4705)</p> <p>ATP synthase, H+ transporting, mitochondrial F1 complex, alpha subunit 1, cardiac muscle (498)</p> <p>ATP synthase, H+ transporting, mitochondrial F1 complex, O subunit (539)</p> <p>ATP synthase, H+ transporting, mitochondrial F1 complex, beta polypeptide (506)</p> <p>NADH dehydrogenase, subunit 1 (complex I) (4535)</p> <p>cytochrome c oxidase subunit I (4512)</p> <p>NADH:ubiquinone oxidoreductase subunit B10 (4716)</p> <p>NADH:ubiquinone oxidoreductase subunit B9 (4715)</p> <p>ATP synthase, H+ transporting, mitochondrial Fo complex subunit B1 (515)</p> <p>ATP synthase, H+ transporting, mitochondrial F1 complex, gamma polypeptide 1 (509)</p> <p>cytochrome c1 (1537)</p> <p>NADH:ubiquinone oxidoreductase core subunit S7 (374291)</p> <p>ubiquinol-cytochrome c reductase, Rieske iron-sulfur polypeptide 1 (7386)</p> <p>ubiquinol-cytochrome c reductase core protein I (7384)</p> <p>ATP synthase, H+ transporting, mitochondrial Fo complex subunit C3 (subunit 9) (518)</p> <p>NADH:ubiquinone oxidoreductase subunit S6 (4726)</p> |

| 1.3 Lipid metabolism | Stomach                                                           | Intestine                                                                                                              | Pancreas                                              | Liver                                                                                                       | Heart                        |
|----------------------|-------------------------------------------------------------------|------------------------------------------------------------------------------------------------------------------------|-------------------------------------------------------|-------------------------------------------------------------------------------------------------------------|------------------------------|
|                      | emopamil binding protein (sterol isomerase) (10682)               | hydroxyacyl-CoA dehydrogenase/3-ketoacyl-CoA thiolase/enoyl-CoA hydratase (trifunctional protein), beta subunit (3032) | lysophosphatidylcholine acyltransferase 3 (10162)     | ectonucleotide pyrophosphatase/phosphodiesterase 6 (133121)                                                 | carboxyl ester lipase (1056) |
|                      | NAD(P) dependent steroid dehydrogenase-like (50814)               | sterol-C5-desaturase (6309)                                                                                            | methylsterol monooxygenase 1 (6307)                   | steroid-5-alpha-reductase, alpha polypeptide 1 (3-oxo-5 alpha-steroid delta 4-dehydrogenase alpha 1) (6715) |                              |
|                      | ELOVL fatty acid elongase 6 (79071)                               | ceramide synthase 1 (10715)                                                                                            | cytochrome P450 family 51 subfamily A member 1 (1595) | hydroxysteroid (17-beta) dehydrogenase 4 (3295)                                                             |                              |
|                      | sterol-C5-desaturase (6309)                                       | bile acid-CoA:amino acid N-acyltransferase (570)                                                                       | emopamil binding protein (sterol isomerase) (10682)   | cytochrome P450 family 2 subfamily C member 19 (1557)                                                       |                              |
|                      | cytochrome P450 family 51 subfamily A member 1 (1595)             | 3-hydroxy-3-methylglutaryl-CoA synthase 1 (3157)                                                                       | aldehyde dehydrogenase 9 family member A1 (223)       | hydroxysteroid (17-beta) dehydrogenase 12 (51144)                                                           |                              |
|                      | lysophosphatidylcholine acyltransferase 3 (10162)                 | glycerol-3-phosphate acyltransferase 3 (84803)                                                                         | NAD(P) dependent steroid dehydrogenase-like (50814)   | acyl-CoA oxidase 2, branched chain (8309)                                                                   |                              |
|                      | CDP-diacylglycerol synthase 1 (1040)                              | CDP-diacylglycerol synthase 1 (1040)                                                                                   | 7-dehydrocholesterol reductase (1717)                 | 24-dehydrocholesterol reductase (1718)                                                                      |                              |
|                      | hydroxysteroid (17-beta) dehydrogenase 7 (51478)                  | sphingosine kinase 1 (8877)                                                                                            | acetyl-CoA acyltransferase 2 (10449)                  | 3-hydroxyacyl-CoA dehydratase 2 (201562)                                                                    |                              |
|                      | aldehyde dehydrogenase 9 family member A1 (223)                   | hydroxy-delta-5-steroid dehydrogenase, 3 beta- and steroid delta-isomerase 7 (80270)                                   |                                                       | 3-hydroxymethyl-3-methylglutaryl-CoA lyase (3155)                                                           |                              |
|                      | lanosterol synthase (2,3-oxidosqualene-lanosterol cyclase) (4047) | lysophosphatidylcholine acyltransferase 3 (10162)                                                                      |                                                       | sphingomyelin phosphodiesterase 1 (6609)                                                                    |                              |
|                      | acetyl-CoA acyltransferase 1 (38)                                 | diacylglycerol O-acyltransferase 1 (8694)                                                                              |                                                       | aldehyde dehydrogenase 9 family member A1 (223)                                                             |                              |
|                      | methylsterol monooxygenase 1 (6307)                               | aldehyde dehydrogenase 9 family member A1 (223)                                                                        |                                                       | acetyl-CoA acyltransferase 2 (10449)                                                                        |                              |
|                      | hydroxysteroid (17-beta) dehydrogenase 12 (51144)                 | acetyl-CoA acyltransferase 2 (10449)                                                                                   |                                                       | phosphate cytidyltransferase 2, ethanolamine (5833)                                                         |                              |
|                      | 7-dehydrocholesterol reductase (1717)                             | choline/ethanolamine phosphotransferase 1 (10390)                                                                      |                                                       | ceramide synthase 1 (10715)                                                                                 |                              |
|                      | 24-dehydrocholesterol reductase (1718)                            | carbonyl reductase 1 (873)                                                                                             |                                                       | aldehyde dehydrogenase 2 family (mitochondrial) (217)                                                       |                              |
|                      | ELOVL fatty acid elongase 1 (64834)                               | glycerol-3-phosphate dehydrogenase 1-like (23171)                                                                      |                                                       | cytochrome P450 family 8 subfamily B member 1 (1582)                                                        |                              |
|                      |                                                                   | ELOVL fatty acid elongase 6 (79071)                                                                                    |                                                       | glyceronephosphate O-acyltransferase (8443)                                                                 |                              |
|                      |                                                                   | thromboxane A synthase 1 (6916)                                                                                        |                                                       | serine palmitoyltransferase long chain base subunit 2 (9517)                                                |                              |
|                      |                                                                   | hydroxysteroid (17-beta) dehydrogenase 2 (3294)                                                                        |                                                       | sulfotransferase family 2B member 1 (6820)                                                                  |                              |
|                      |                                                                   | hydroxysteroid (17-beta) dehydrogenase 7 (51478)                                                                       |                                                       | cytochrome P450 family 1 subfamily A member 1 (1543)                                                        |                              |
|                      |                                                                   | N-acylsphingosine amidohydrolase (non-lysosomal ceramidase) 2 (56624)                                                  |                                                       | fatty acid synthase (2194)                                                                                  |                              |
|                      |                                                                   | glycerol kinase (2710)                                                                                                 |                                                       | lysophosphatidylcholine acyltransferase 3 (10162)                                                           |                              |
|                      |                                                                   | emopamil binding protein (sterol isomerase) (10682)                                                                    |                                                       | glutathione peroxidase 7 (2882)                                                                             |                              |

|                       |                                                                                 |                                                                                                                                                                                                                                                                                                                                                                                                                                                                                                                                                                                      |                                                                                    |                                                                                                                                                                                                                                                                                                                                                                                                                                                              |                                           |
|-----------------------|---------------------------------------------------------------------------------|--------------------------------------------------------------------------------------------------------------------------------------------------------------------------------------------------------------------------------------------------------------------------------------------------------------------------------------------------------------------------------------------------------------------------------------------------------------------------------------------------------------------------------------------------------------------------------------|------------------------------------------------------------------------------------|--------------------------------------------------------------------------------------------------------------------------------------------------------------------------------------------------------------------------------------------------------------------------------------------------------------------------------------------------------------------------------------------------------------------------------------------------------------|-------------------------------------------|
|                       |                                                                                 | <p>ectonucleotide pyrophosphatase/phosphodiesterase 7 (339221)</p> <p>arylsulfatase A (410) transmembrane 7 superfamily member 2 (7108)</p> <p>hydroxysteroid (17-beta) dehydrogenase 12 (51144)</p> <p>cytochrome P450 family 3 subfamily A member 4 (1576)</p> <p>diacylglycerol O-acyltransferase 2 (84649)<br/>ELOVL fatty acid elongase 1 (64834)</p> <p>7-dehydrocholesterol reductase (1717)<br/>phosphate cytidyltransferase 1, choline, beta (9468)</p> <p>stearoyl-CoA desaturase (delta-9-desaturase) (6319)<br/>cytochrome P450 family 8 subfamily B member 1 (1582)</p> |                                                                                    | <p>sterol carrier protein 2 (6342)<br/>fatty acid desaturase 1 (3992)<br/>3-hydroxybutyrate dehydrogenase, type 2 (56898)</p> <p>bile acid-CoA:amino acid N-acyltransferase (570)</p> <p>1-acylglycerol-3-phosphate O-acyltransferase 3 (56894)</p> <p>lysophosphatidylglycerol acyltransferase 1 (9926)<br/>methylsterol monooxygenase 1 (6307)</p> <p>peroxisomal trans-2-enoyl-CoA reductase (55825)</p> <p>diacylglycerol O-acyltransferase 1 (8694)</p> |                                           |
| Up-regulated gene     | <p>hydroxyacyl-CoA dehydrogenase (3033)<br/>glutathione peroxidase 1 (2876)</p> | <p>hydroxyacyl-CoA dehydrogenase (3033)<br/>leukotriene A4 hydrolase (4048)<br/>catechol-O-methyltransferase (1312)</p> <p>aldehyde dehydrogenase 2 family (mitochondrial) (217)</p>                                                                                                                                                                                                                                                                                                                                                                                                 | <p>carboxyl ester lipase (1056)<br/>pancreatic lipase-related protein 1 (5407)</p> | <p>glycerol-3-phosphate dehydrogenase 1 (2819)<br/>glutathione peroxidase 3 (2878)<br/>sphingosine-1-phosphate lyase 1 (8879)</p> <p>prostaglandin E synthase 3 (10728)<br/>catechol-O-methyltransferase (1312)<br/>hydroxyacyl-CoA dehydrogenase (3033)<br/>cytochrome P450 family 1 subfamily A member 2 (1544)</p>                                                                                                                                        | <p>3-oxoacid CoA-transferase 1 (5019)</p> |
| Highly expressed gene |                                                                                 |                                                                                                                                                                                                                                                                                                                                                                                                                                                                                                                                                                                      |                                                                                    |                                                                                                                                                                                                                                                                                                                                                                                                                                                              |                                           |

| 1.5 Amino acid metabolism | Stomach                                                           | Intestine                                                                                                              | Pancreas                                            | Liver                                                            | Heart                         |
|---------------------------|-------------------------------------------------------------------|------------------------------------------------------------------------------------------------------------------------|-----------------------------------------------------|------------------------------------------------------------------|-------------------------------|
|                           | branched chain amino-acid transaminase 2, mitochondrial (587)     | acyl-CoA dehydrogenase, short/branched chain (36)                                                                      | aldehyde dehydrogenase 9 family member A1 (223)     | alanine-glyoxylate aminotransferase (189)                        | creatine kinase, brain (1152) |
|                           | 3-hydroxyisobutyrate dehydrogenase (11112)                        | creatine kinase, brain (1152)                                                                                          | asparagine synthetase (glutamine-hydrolyzing) (440) | acyl-CoA dehydrogenase, short/branched chain (36)                |                               |
|                           | cysteine dioxygenase type 1 (1036)                                | nitrilase family member 2 (56954)                                                                                      | alanine-glyoxylate aminotransferase (189)           | phosphoserine aminotransferase 1 (29968)                         |                               |
|                           | aldehyde dehydrogenase 9 family member A1 (223)                   | acetyl-CoA acyltransferase 2 (10449)                                                                                   | glutaminase (2744)                                  | monoamine oxidase B (4129)                                       |                               |
|                           | glutaryl-CoA dehydrogenase (2639)                                 | amine oxidase, copper containing 1 (26)                                                                                | aminomethyltransferase (275)                        | glutamine-fructose-6-phosphate transaminase 1 (2673)             |                               |
|                           | mercaptopyruvate sulfurtransferase (4357)                         | 4-aminobutyrate aminotransferase (18)                                                                                  | glutaryl-CoA dehydrogenase (2639)                   | aminomethyltransferase (275)                                     |                               |
|                           | cystathionine gamma-lyase (1491)                                  | aldehyde dehydrogenase 9 family member A1 (223)                                                                        | 4-aminobutyrate aminotransferase (18)               | 5-aminolevulinate synthase 1 (211)                               |                               |
|                           | creatine kinase, brain (1152)                                     | aldehyde dehydrogenase 5 family member A1 (7915)                                                                       | creatine kinase, brain (1152)                       | argininosuccinate lyase (435)                                    |                               |
|                           | aldehyde dehydrogenase 4 family member A1 (8659)                  | adenosylhomocysteinase like 2 (23382)                                                                                  | thiosulfate sulfurtransferase (7263)                | alcohol dehydrogenase 1C (class I), gamma polypeptide (126)      |                               |
|                           | phosphoserine phosphatase (5723)                                  | CNDP dipeptidase 2 (metallopeptidase M20 family) (55748)                                                               | cystathionine gamma-lyase (1491)                    | phosphoglycerate mutase 1 (5223)                                 |                               |
|                           | alcohol dehydrogenase 5 (class III), chi polypeptide (128)        | thiosulfate sulfurtransferase (7263)                                                                                   | acetyl-CoA acyltransferase 2 (10449)                | carnosine dipeptidase 1 (metallopeptidase M20 family) (84735)    |                               |
|                           | alcohol dehydrogenase 7 (class IV), mu or sigma polypeptide (131) | leucine aminopeptidase 3 (51056)                                                                                       | nitric oxide synthase 1 (4842)                      | glutamic-pyruvate transaminase (alanine aminotransferase) (2875) |                               |
|                           | propionyl-CoA carboxylase alpha subunit (5095)                    | hydroxyacyl-CoA dehydrogenase/3-ketoacyl-CoA thiolase/enoyl-CoA hydratase (trifunctional protein), beta subunit (3032) | serine hydroxymethyltransferase 1 (soluble) (6470)  | 3-hydroxymethyl-3-methylglutaryl-CoA lyase (3155)                |                               |
|                           | pyruvate dehydrogenase (lipoamide) beta (5162)                    | phosphoserine aminotransferase 1 (29968)                                                                               |                                                     | enoyl-CoA, hydratase/3-hydroxyacyl CoA dehydrogenase (1962)      |                               |
|                           | dihydrolipoamide branched chain transacylase E2 (1629)            | alcohol dehydrogenase 7 (class IV), mu or sigma polypeptide (131)                                                      |                                                     | betaine-homocysteine S-methyltransferase (635)                   |                               |
|                           | asparagine synthetase (glutamine-hydrolyzing) (440)               | phosphoserine phosphatase (5723)                                                                                       |                                                     | cysteine dioxygenase type 1 (1036)                               |                               |
|                           | acetyl-CoA acetyltransferase 1 (38)                               | 3-hydroxyisobutyryl-CoA hydrolase (26275)                                                                              |                                                     | argininosuccinate synthase 1 (445)                               |                               |
|                           |                                                                   | monoamine oxidase B (4129)                                                                                             |                                                     | guanidinoacetate N-methyltransferase (2593)                      |                               |
|                           |                                                                   | 3-hydroxy-3-methylglutaryl-CoA synthase 1 (3157)                                                                       |                                                     | amidohydrolase domain containing 1 (144193)                      |                               |
|                           |                                                                   | acyl-CoA dehydrogenase, C4 to C-12 straight chain (34)                                                                 |                                                     | aldehyde dehydrogenase 9 family member A1 (223)                  |                               |
|                           |                                                                   | pyruvate dehydrogenase (lipoamide) beta (5162)                                                                         |                                                     | acetyl-CoA acyltransferase 2 (10449)                             |                               |
|                           |                                                                   | glutamic-oxaloacetic transaminase 1, soluble (2805)                                                                    |                                                     | 3-hydroxyanthranilate 3,4-dioxygenase (23498)                    |                               |
|                           |                                                                   | glutaryl-CoA dehydrogenase (2639)                                                                                      |                                                     | glutathione S-transferase zeta 1 (2954)                          |                               |
|                           |                                                                   | oxoglutarate dehydrogenase-like (55753)                                                                                |                                                     | pyruvate dehydrogenase (lipoamide) beta (5162)                   |                               |

|                       |                                                                                                                                                               |                                                                                                                                                                                                                                                                                                                                                                                      |                                                                                                                                                                        |                                                                                                                                                                                                                                                                                                                                                                                                                                                                                                                                                                                                                                                                               |                                                                                                                                                                                                                              |
|-----------------------|---------------------------------------------------------------------------------------------------------------------------------------------------------------|--------------------------------------------------------------------------------------------------------------------------------------------------------------------------------------------------------------------------------------------------------------------------------------------------------------------------------------------------------------------------------------|------------------------------------------------------------------------------------------------------------------------------------------------------------------------|-------------------------------------------------------------------------------------------------------------------------------------------------------------------------------------------------------------------------------------------------------------------------------------------------------------------------------------------------------------------------------------------------------------------------------------------------------------------------------------------------------------------------------------------------------------------------------------------------------------------------------------------------------------------------------|------------------------------------------------------------------------------------------------------------------------------------------------------------------------------------------------------------------------------|
|                       |                                                                                                                                                               | <p>carosine dipeptidase 1 (metallopeptidase M20 family) (84735)<br/> cystathionine gamma-lyase (1491)</p>                                                                                                                                                                                                                                                                            |                                                                                                                                                                        | <p>alcohol dehydrogenase 5 (class III), chi polypeptide (128)<br/> nitrilase family member 2 (56954)<br/> thiosulfate sulfurtransferase (7263)<br/> aldehyde dehydrogenase 2 family (mitochondrial) (217)<br/> asparagine synthetase (glutamine-hydrolyzing) (440)<br/> kynureninase (8942)<br/> agmatinase (79814)<br/> glutamate dehydrogenase 1 (2746)<br/> aminoacylase 3 (91703)<br/> aminocarboxymuconate semialdehyde decarboxylase (130013)<br/> alcohol dehydrogenase 7 (class IV), mu or sigma polypeptide (131)<br/> glutaryl-CoA dehydrogenase (2639)<br/> adenosylmethionine decarboxylase 1 (262)<br/> cytochrome P450 family 1 subfamily A member 1 (1543)</p> |                                                                                                                                                                                                                              |
| Up-regulated gene     |                                                                                                                                                               |                                                                                                                                                                                                                                                                                                                                                                                      |                                                                                                                                                                        |                                                                                                                                                                                                                                                                                                                                                                                                                                                                                                                                                                                                                                                                               |                                                                                                                                                                                                                              |
| Highly expressed gene | <p>phosphoglycerate dehydrogenase (26227)<br/> glutamic-pyruvate transaminase (alanine aminotransferase) (2875)<br/> hydroxyacyl-CoA dehydrogenase (3033)</p> | <p>catechol-O-methyltransferase (1312)<br/> aldehyde dehydrogenase 2 family (mitochondrial) (217)<br/> D-amino-acid oxidase (1610)<br/> phosphoglycerate dehydrogenase (26227)<br/> glutamic-pyruvate transaminase (alanine aminotransferase) (2875)<br/> adenylosuccinate lyase (158)<br/> glutamic-oxaloacetic transaminase 2 (2806)<br/> hydroxyacyl-CoA dehydrogenase (3033)</p> | <p>fumarylacetoacetate hydrolase (fumarylacetoacetase) (2184)<br/> aldehyde dehydrogenase 4 family member A1 (8659)<br/> proline dehydrogenase (oxidase) 2 (58510)</p> | <p>homogentisate 1,2-dioxygenase (3081)<br/> cytochrome P450 family 1 subfamily A member 2 (1544)<br/> fumarylacetoacetate hydrolase (fumarylacetoacetase) (2184)<br/> serine hydroxymethyltransferase 2 (mitochondrial) (6472)<br/> serine hydroxymethyltransferase 1 (soluble) (6470)<br/> cystathionine gamma-lyase (1491)<br/> catechol-O-methyltransferase (1312)<br/> adenosylhomocysteinase (191)<br/> lactate dehydrogenase B (3945)<br/> phosphoserine phosphatase (5723)<br/> leucine aminopeptidase 3 (51056)<br/> catalase (847)<br/> glutamic-oxaloacetic transaminase 2 (2806)<br/> hydroxyacyl-CoA dehydrogenase (3033)</p>                                    | <p>creatine kinase, muscle (1158)<br/> glutamic-oxaloacetic transaminase 2 (2806)<br/> 3-oxoacid CoA-transferase 1 (5019)<br/> glutamic-oxaloacetic transaminase 1, soluble (2805)<br/> phosphoglycerate mutase 2 (5224)</p> |



Figure 1

[Click here to download Figure Figure1.pdf](#)

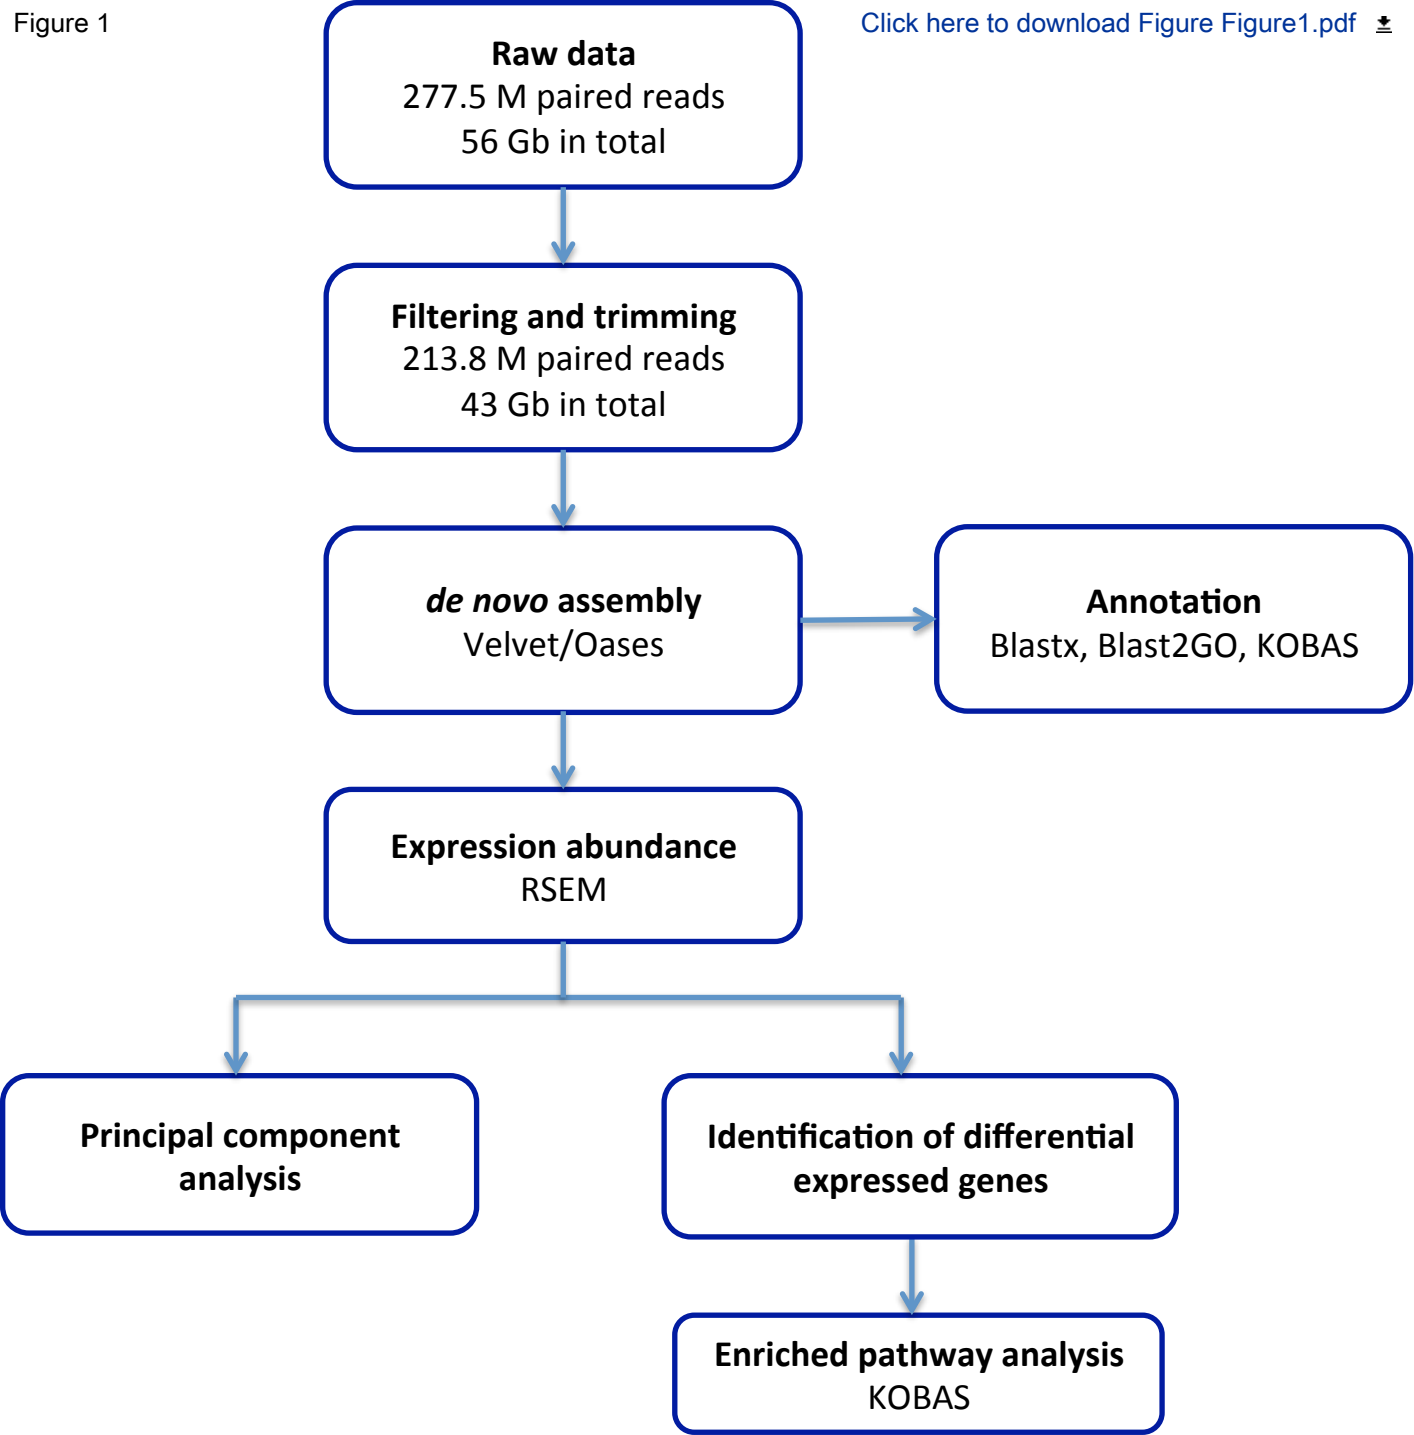

Figure 2

[Click here to download Figure2.pdf](#)

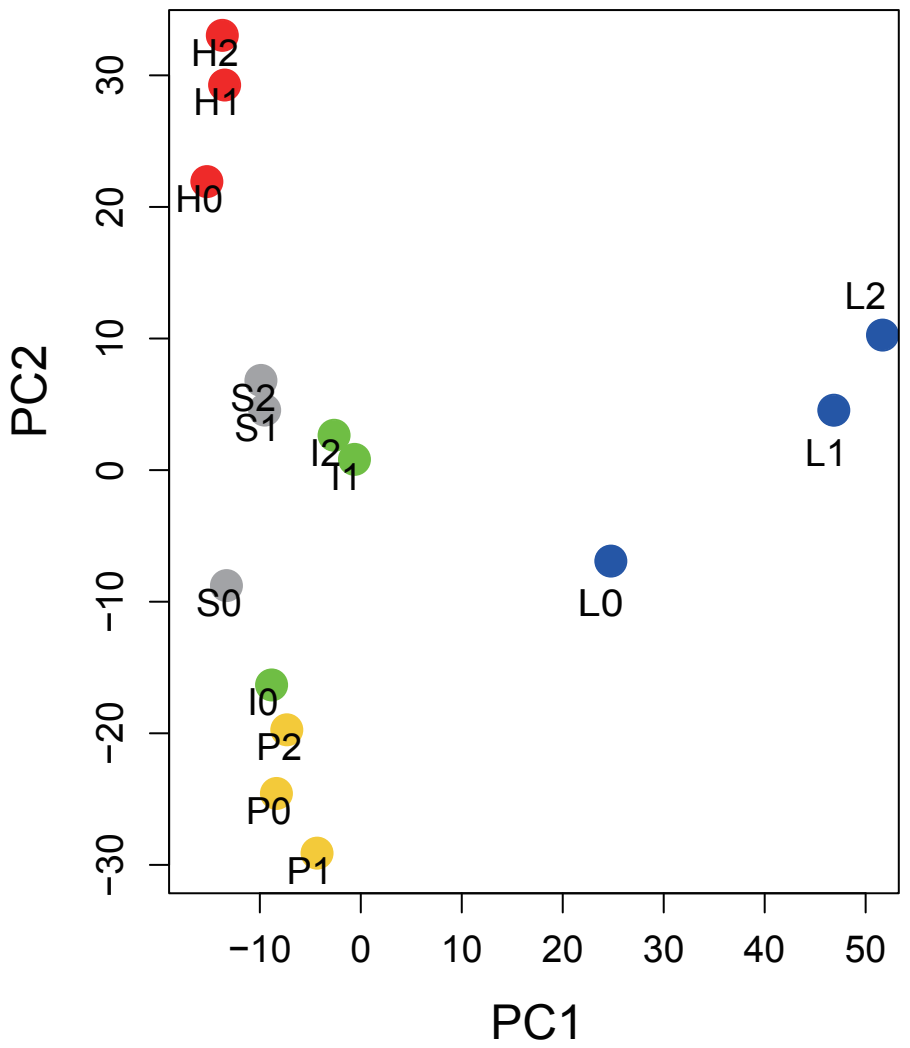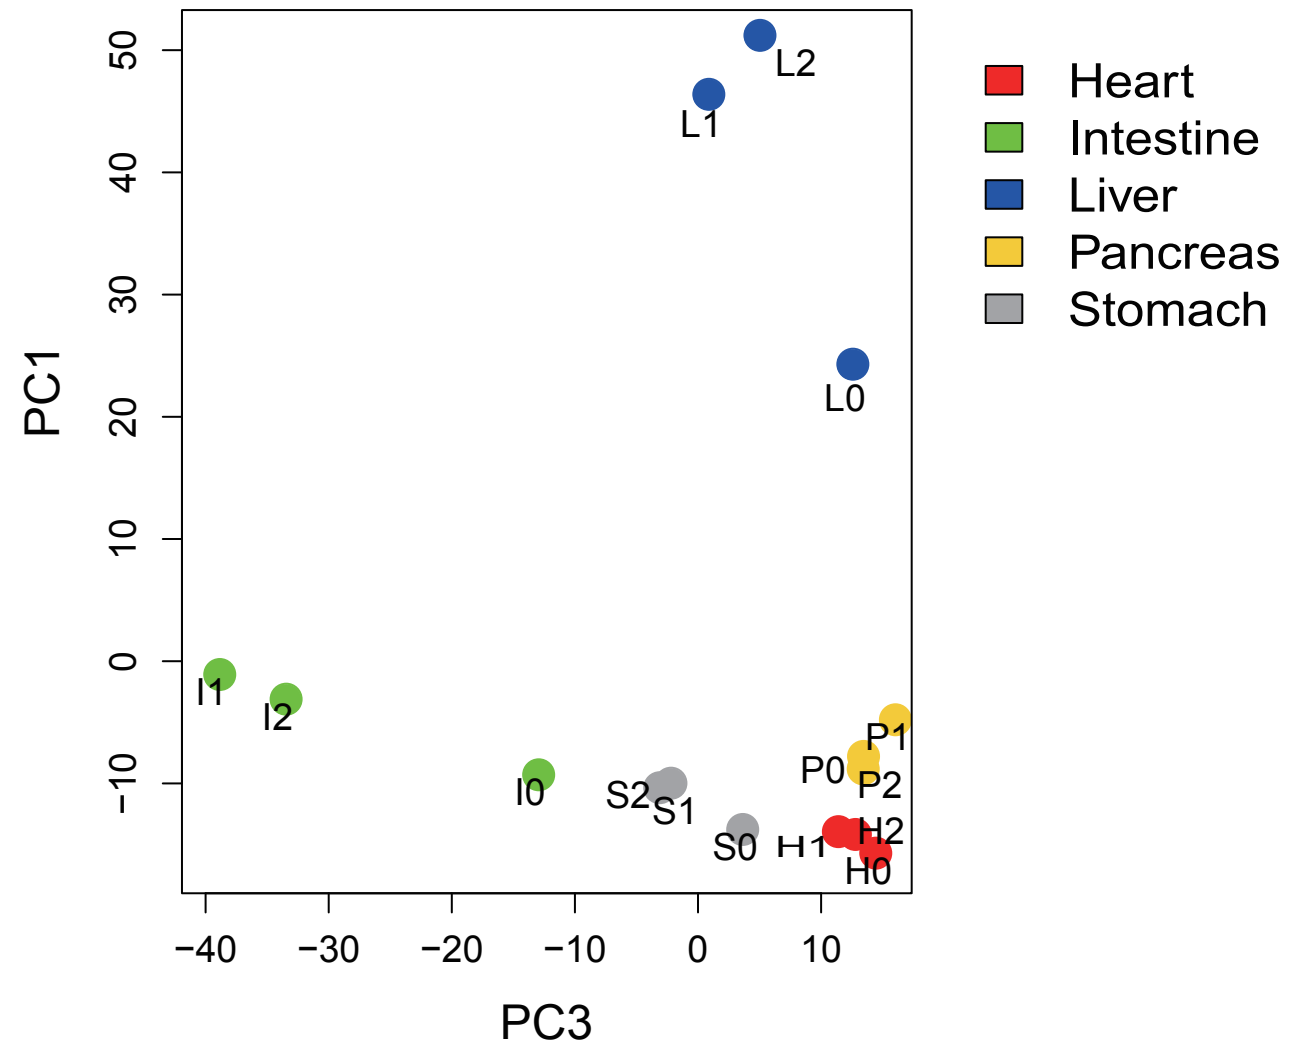

Figure 3

[Click here to download Figure Figure3.pdf](#)

Heart

Intestine

Liver

Pancreas

Stomach

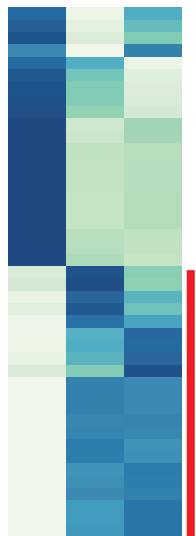

a

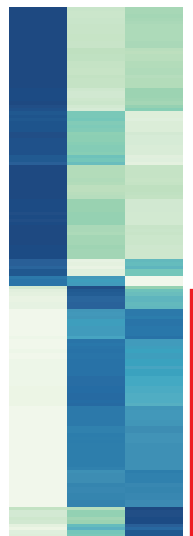

b

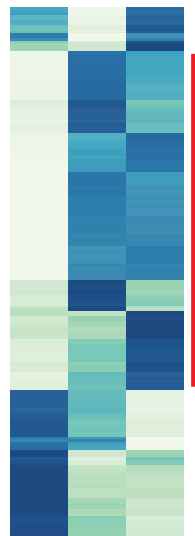

c

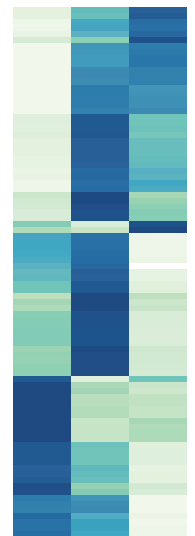

d

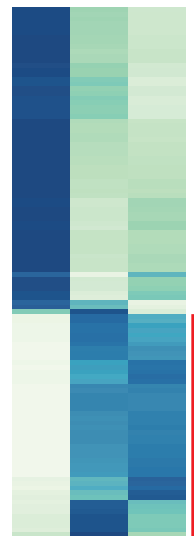

e

Color Key

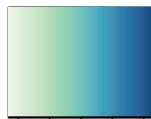

-1 0 1

0 1 2

days after feeding

Figure 4 **Stomach**

[Click here to download Figure Figure4.pdf](#)

**Color Key**

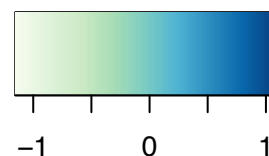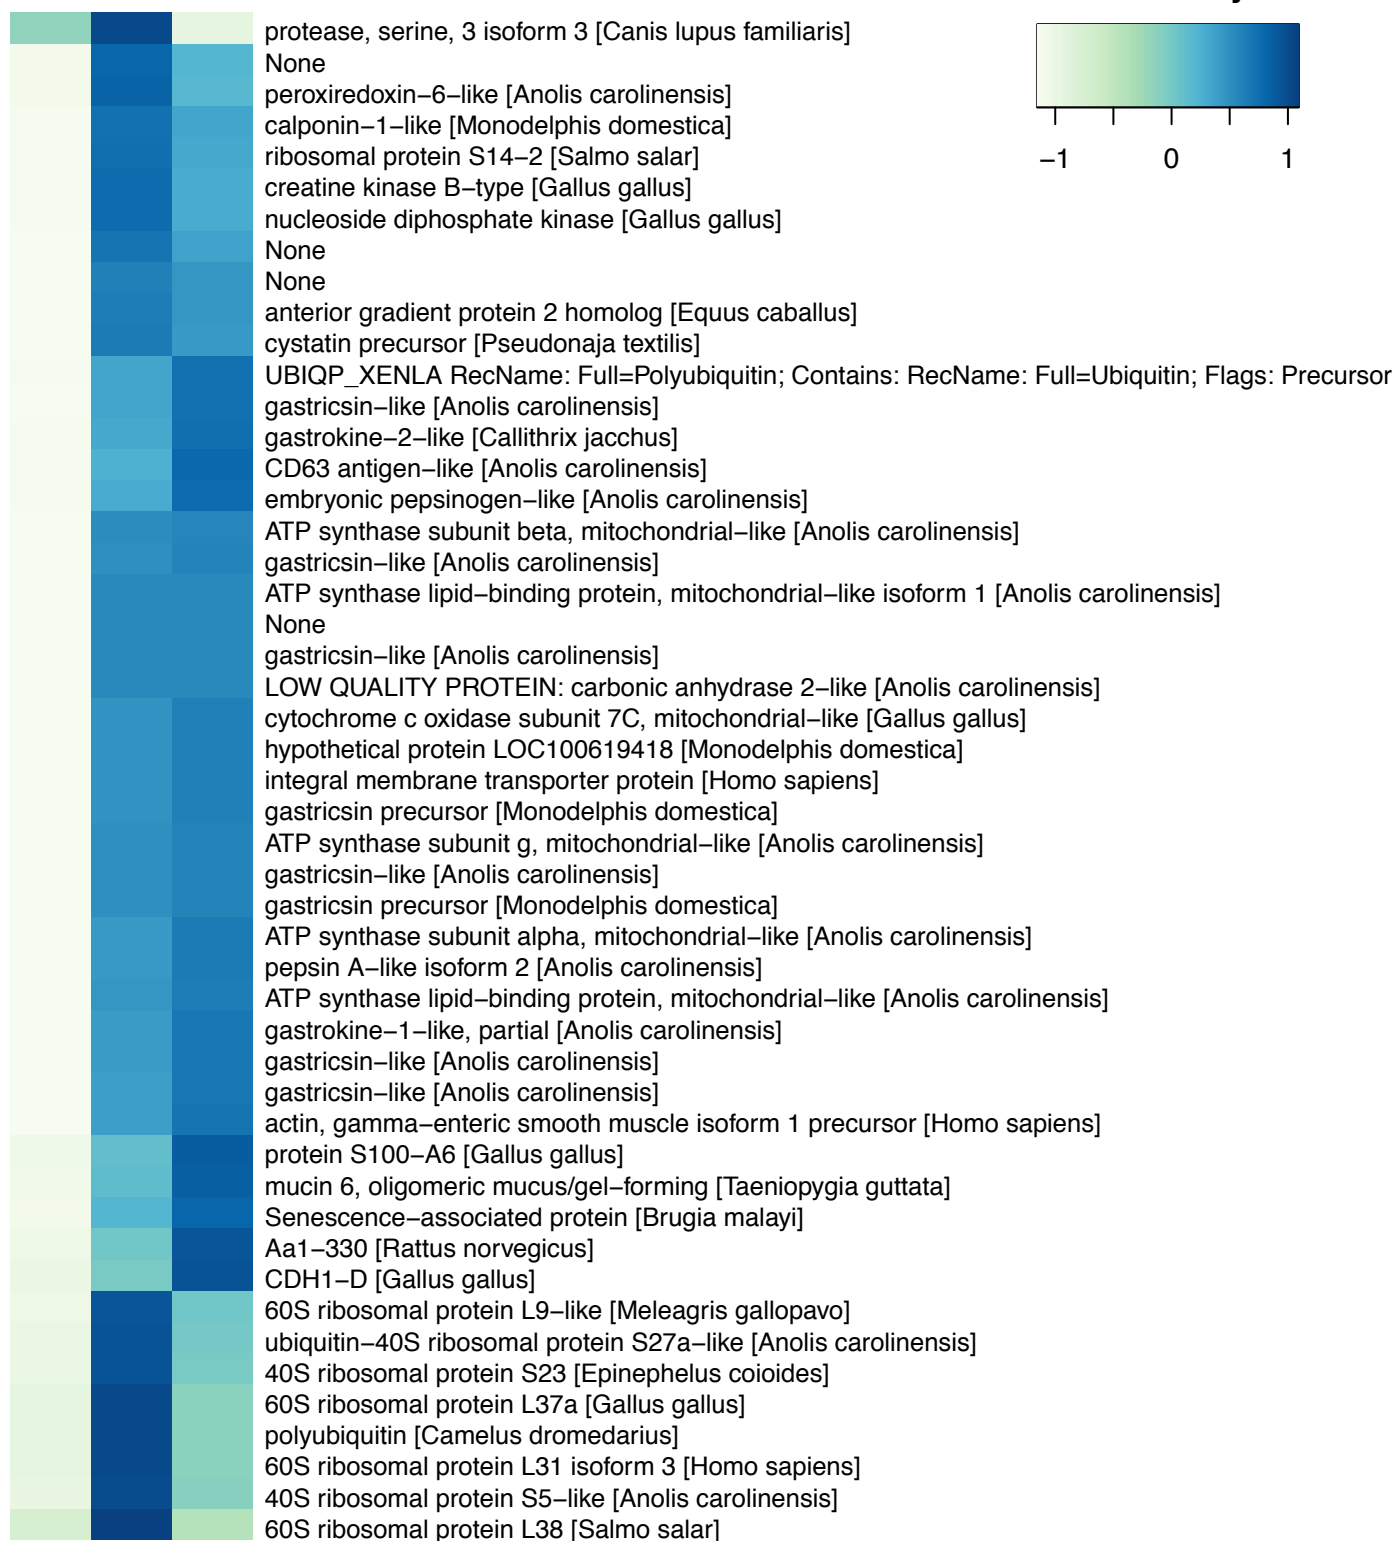

0 1 2

days after feeding

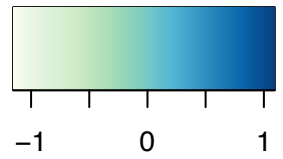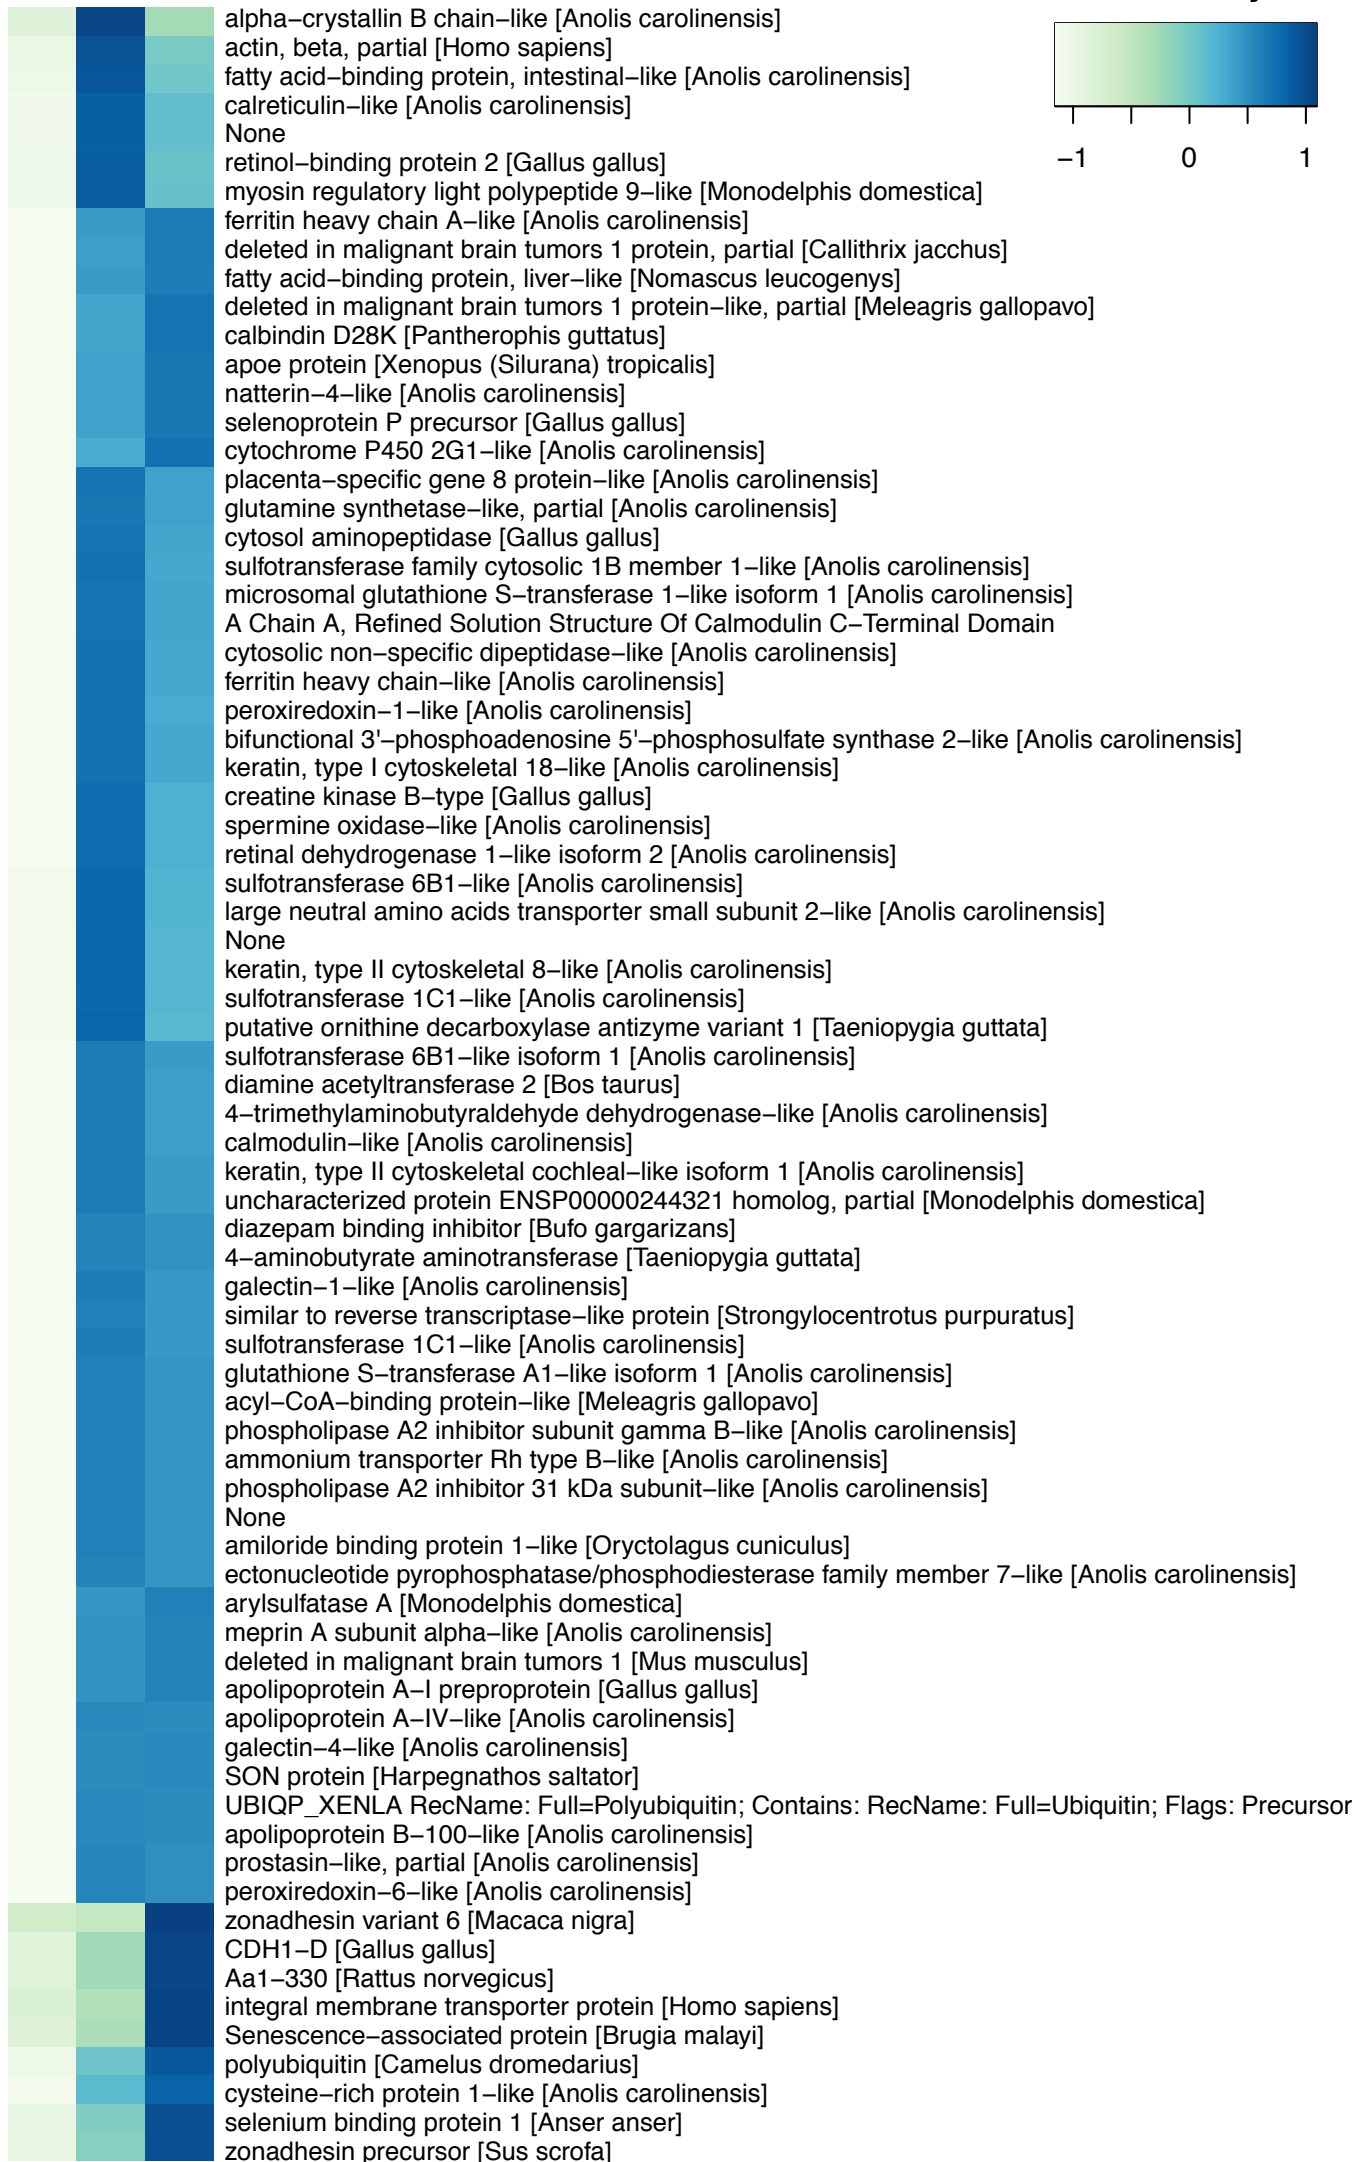

0 1 2

days after feeding

## Heart

Color Key

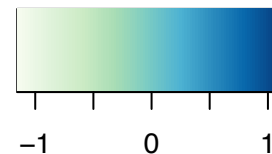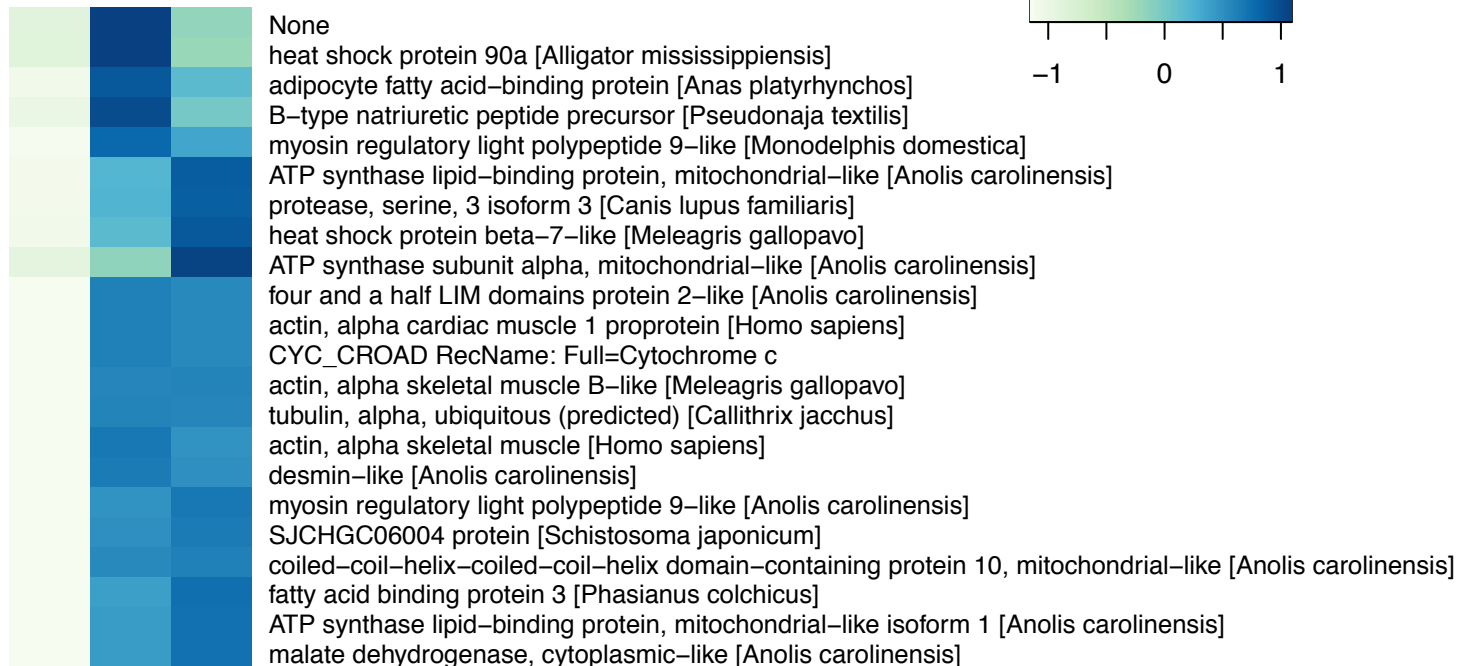

0 1 2

days after feeding

# Liver

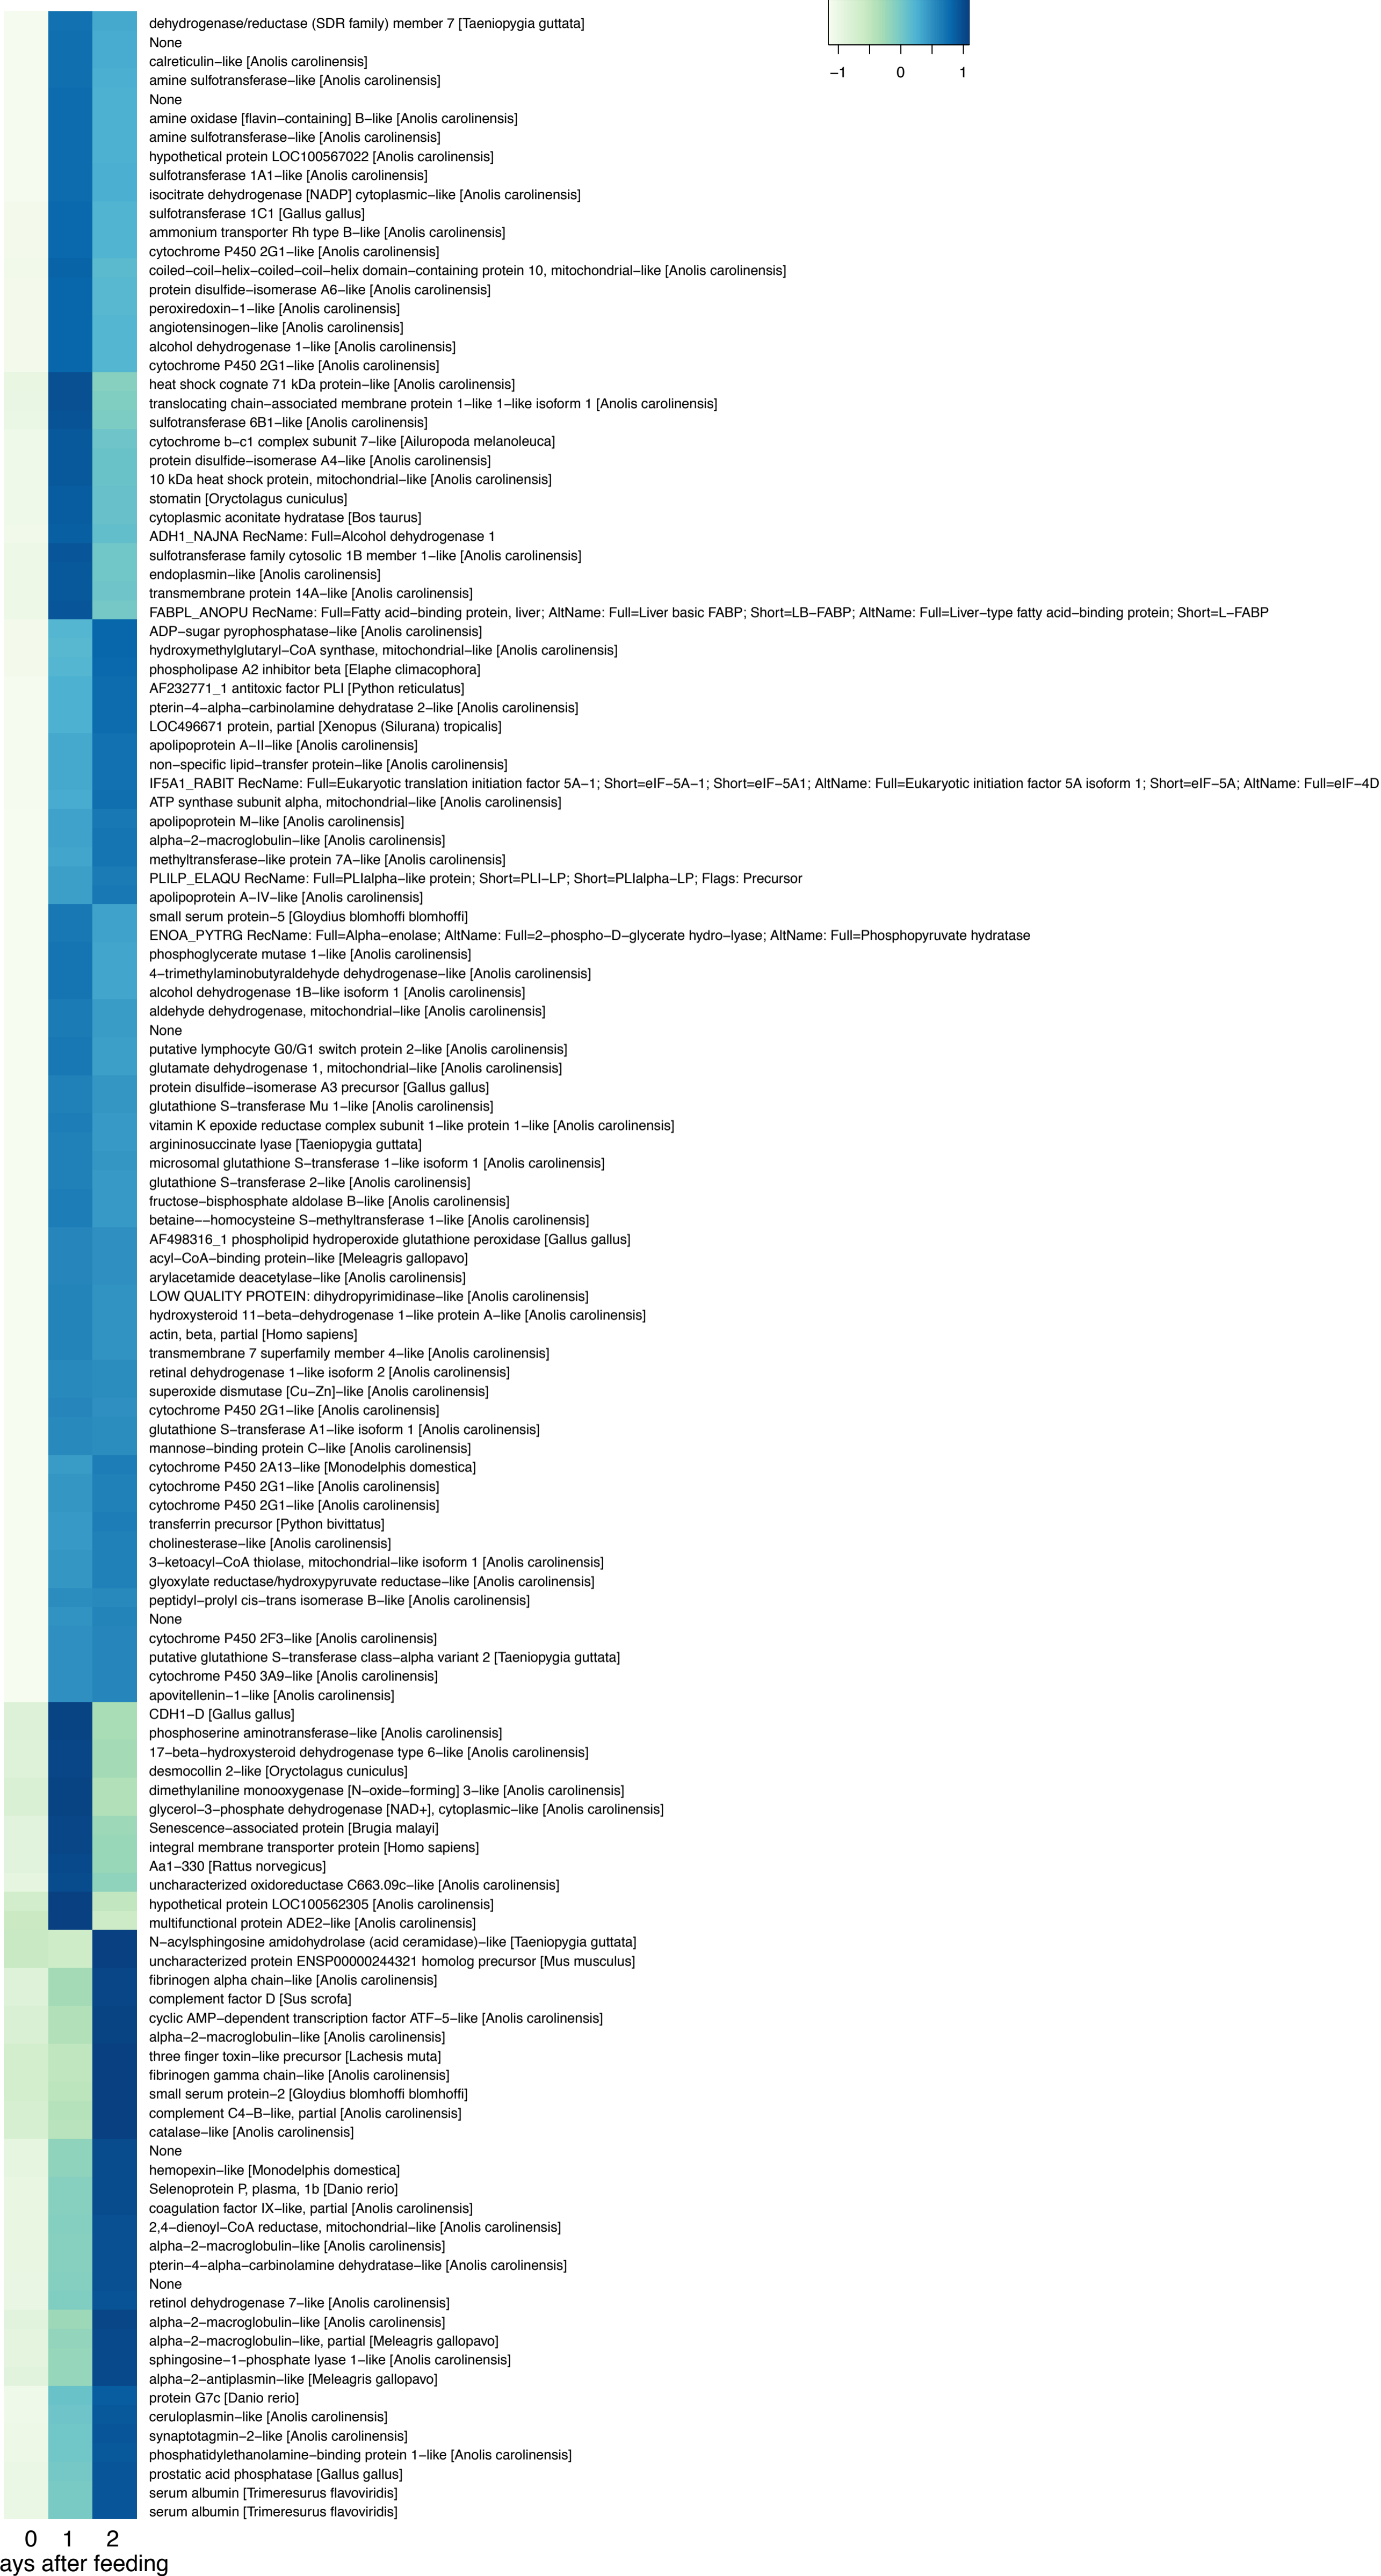

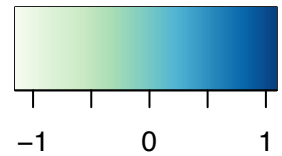

## Pancreas

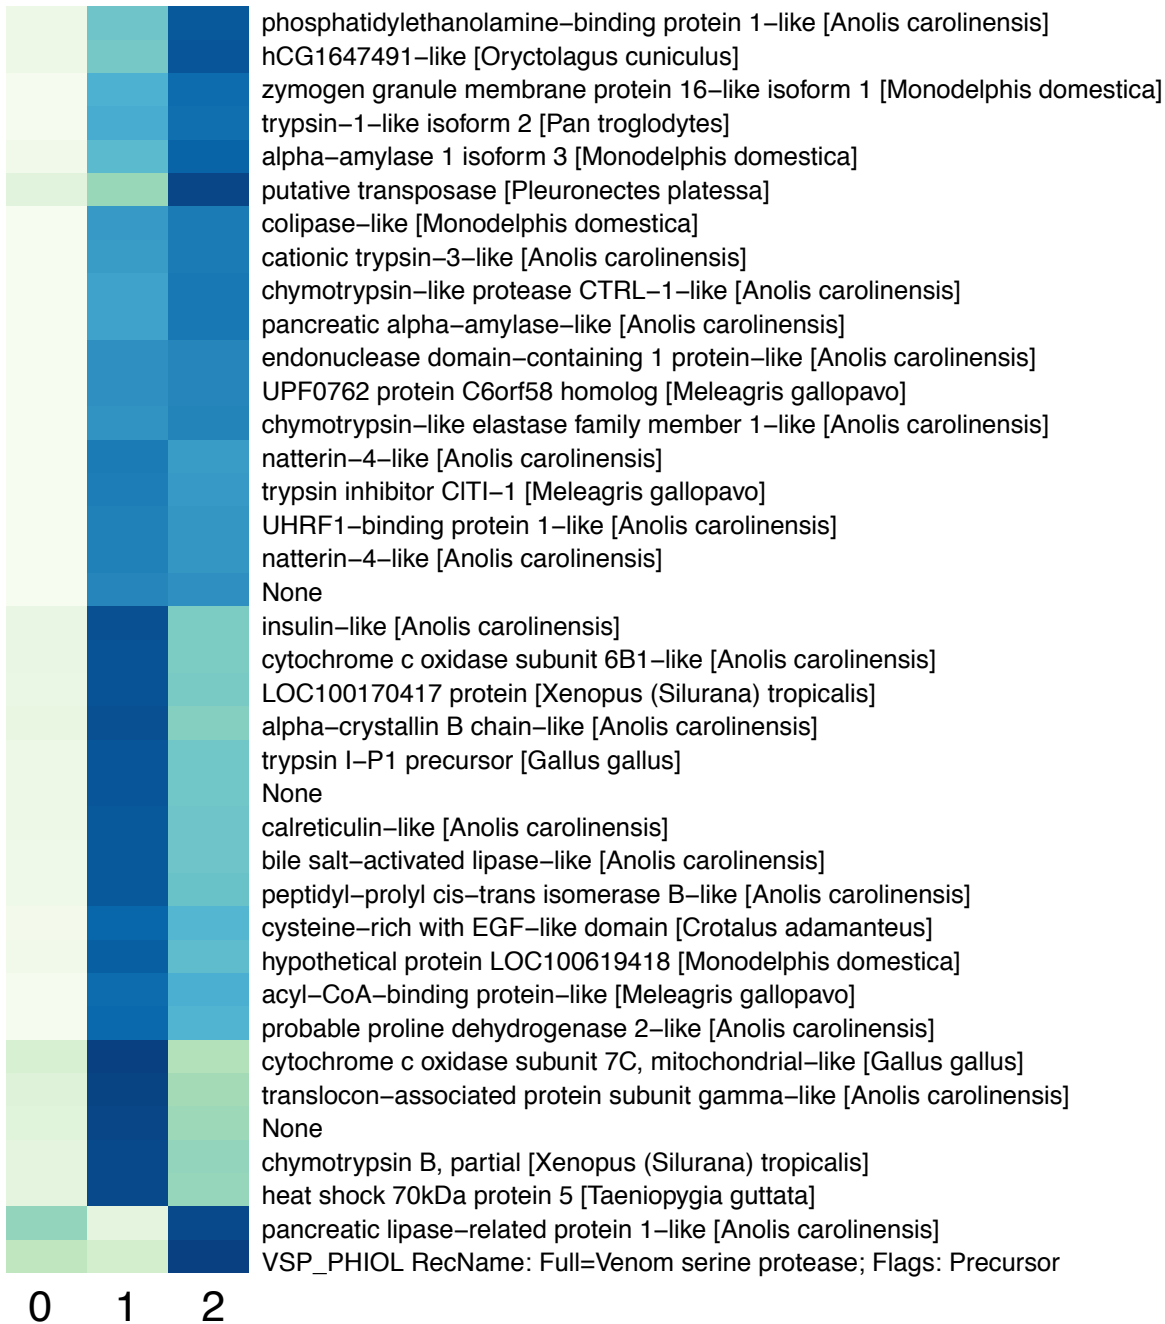

0 1 2

days after feeding



A

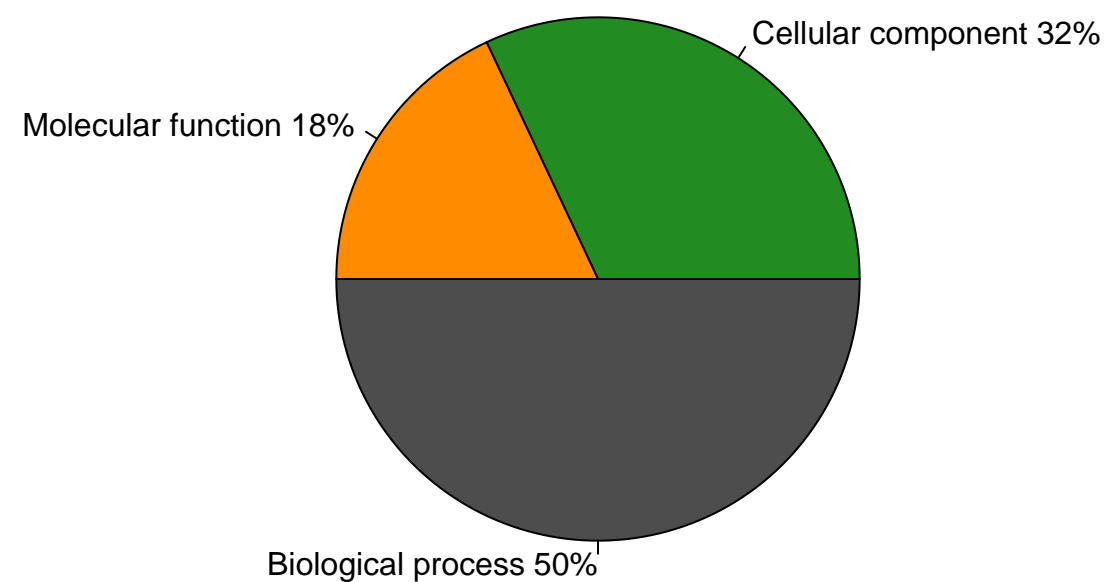

Enriched GO terms with up-regulated genes in stomach

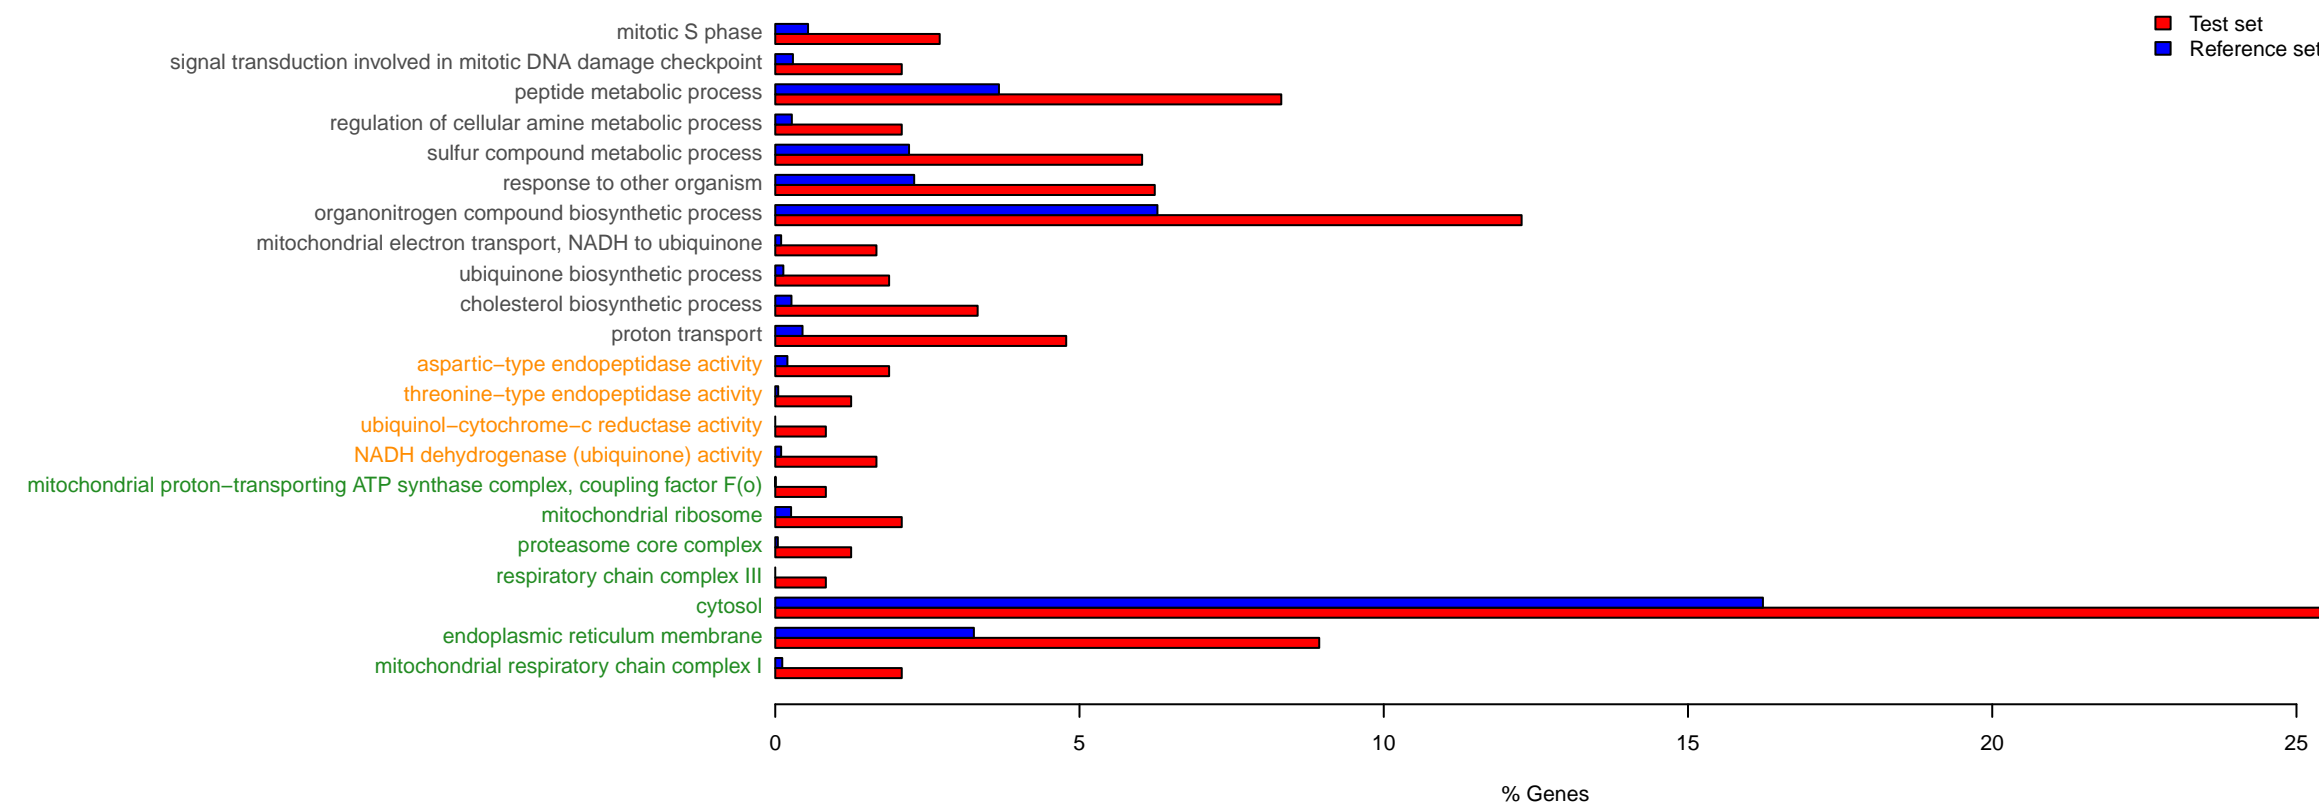

B

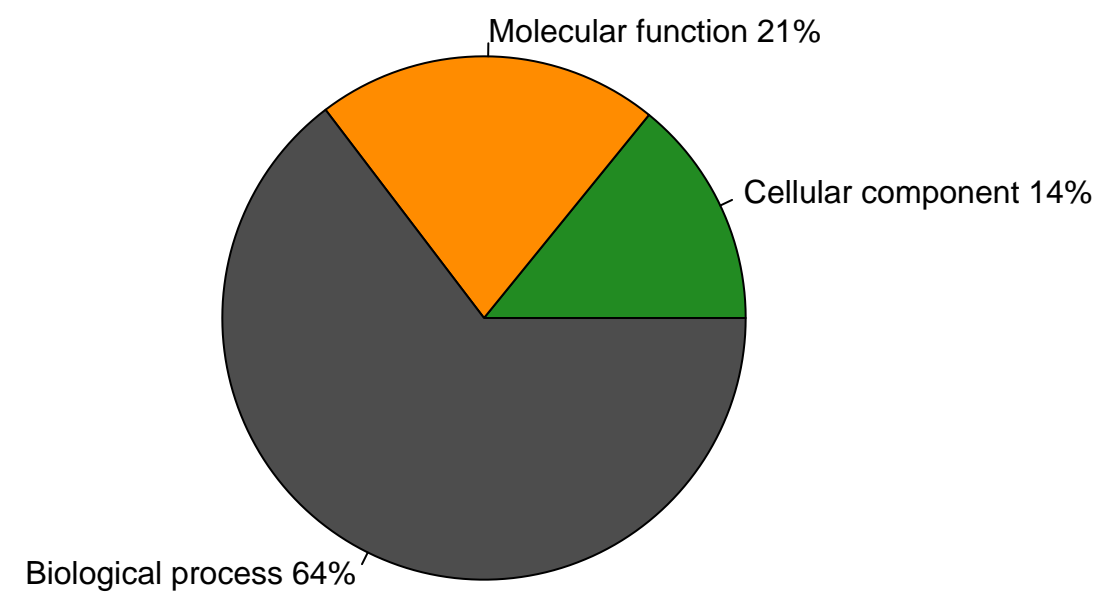

Enriched GO terms with highly expressed genes in stomach

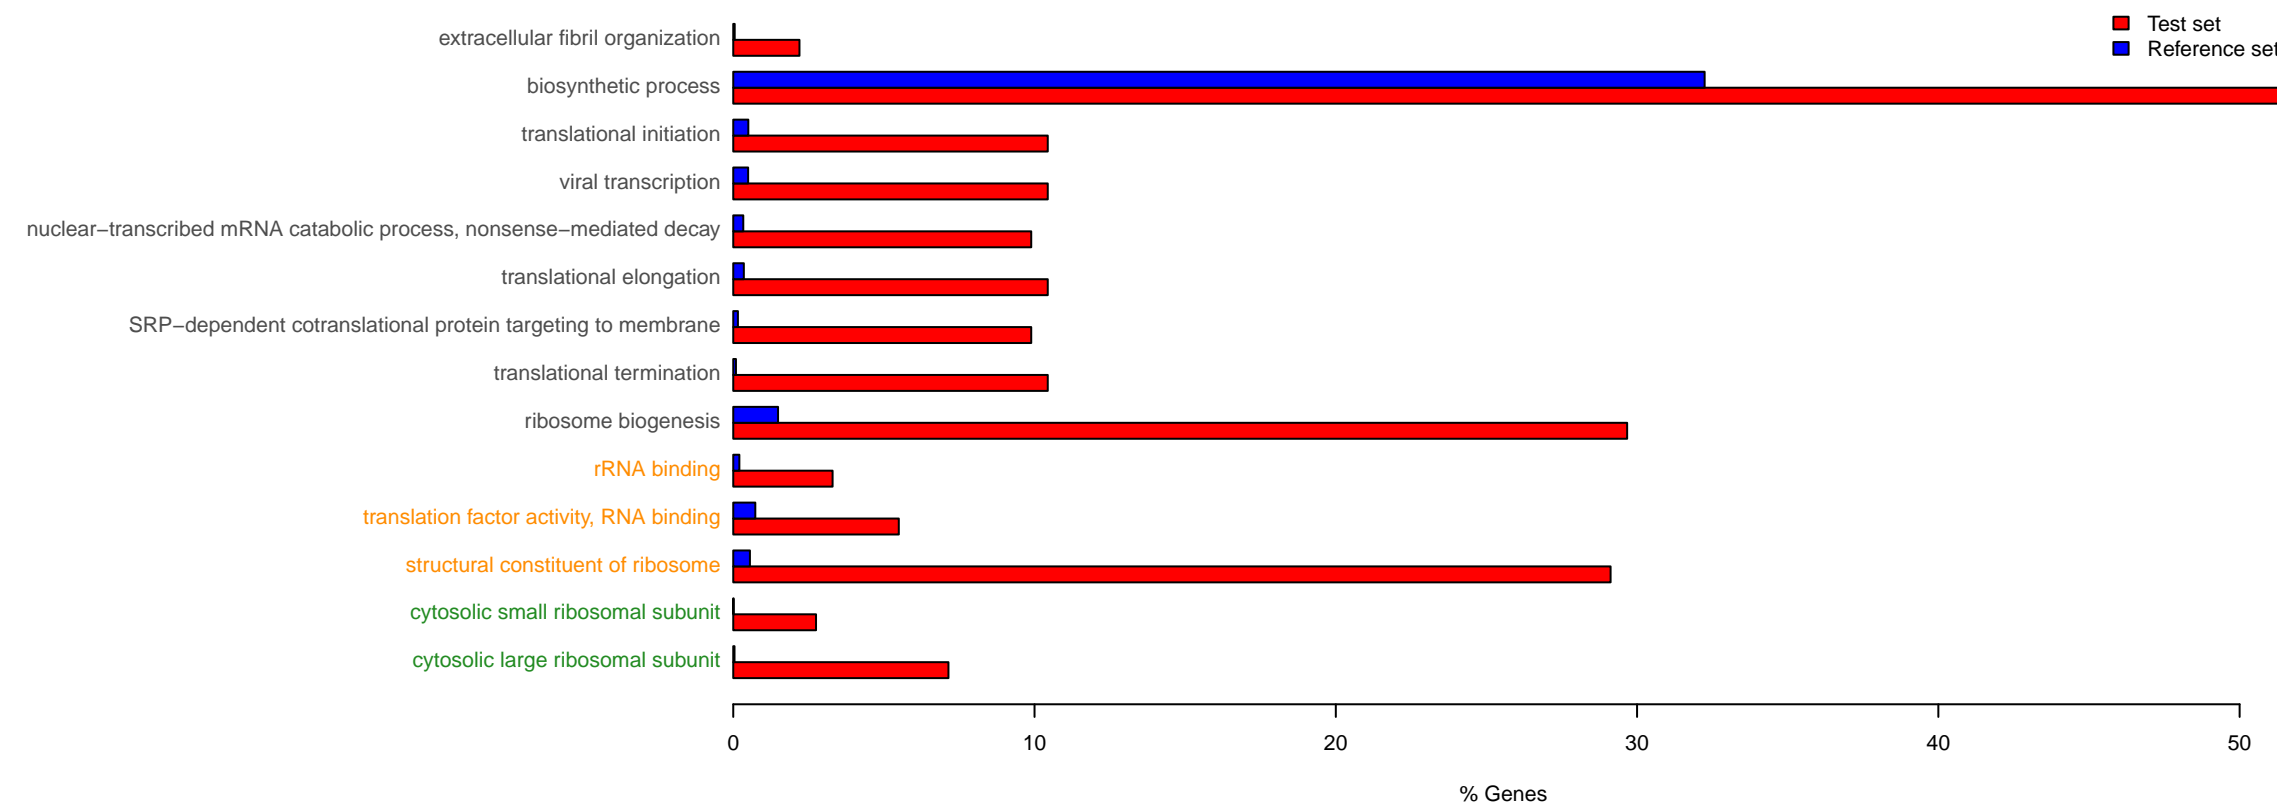

A

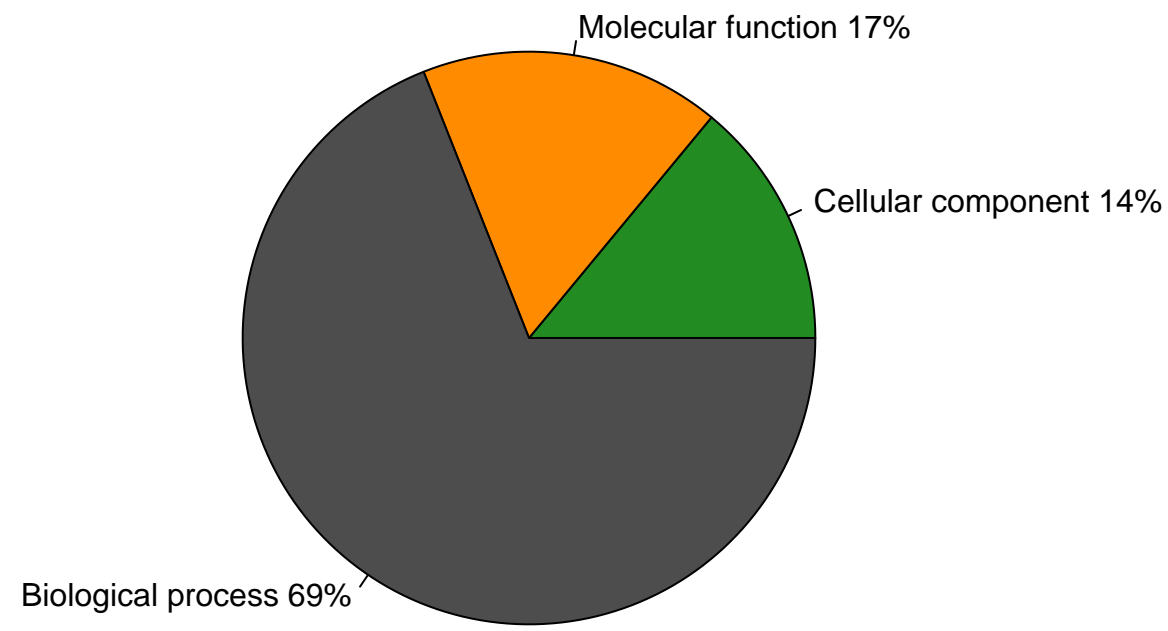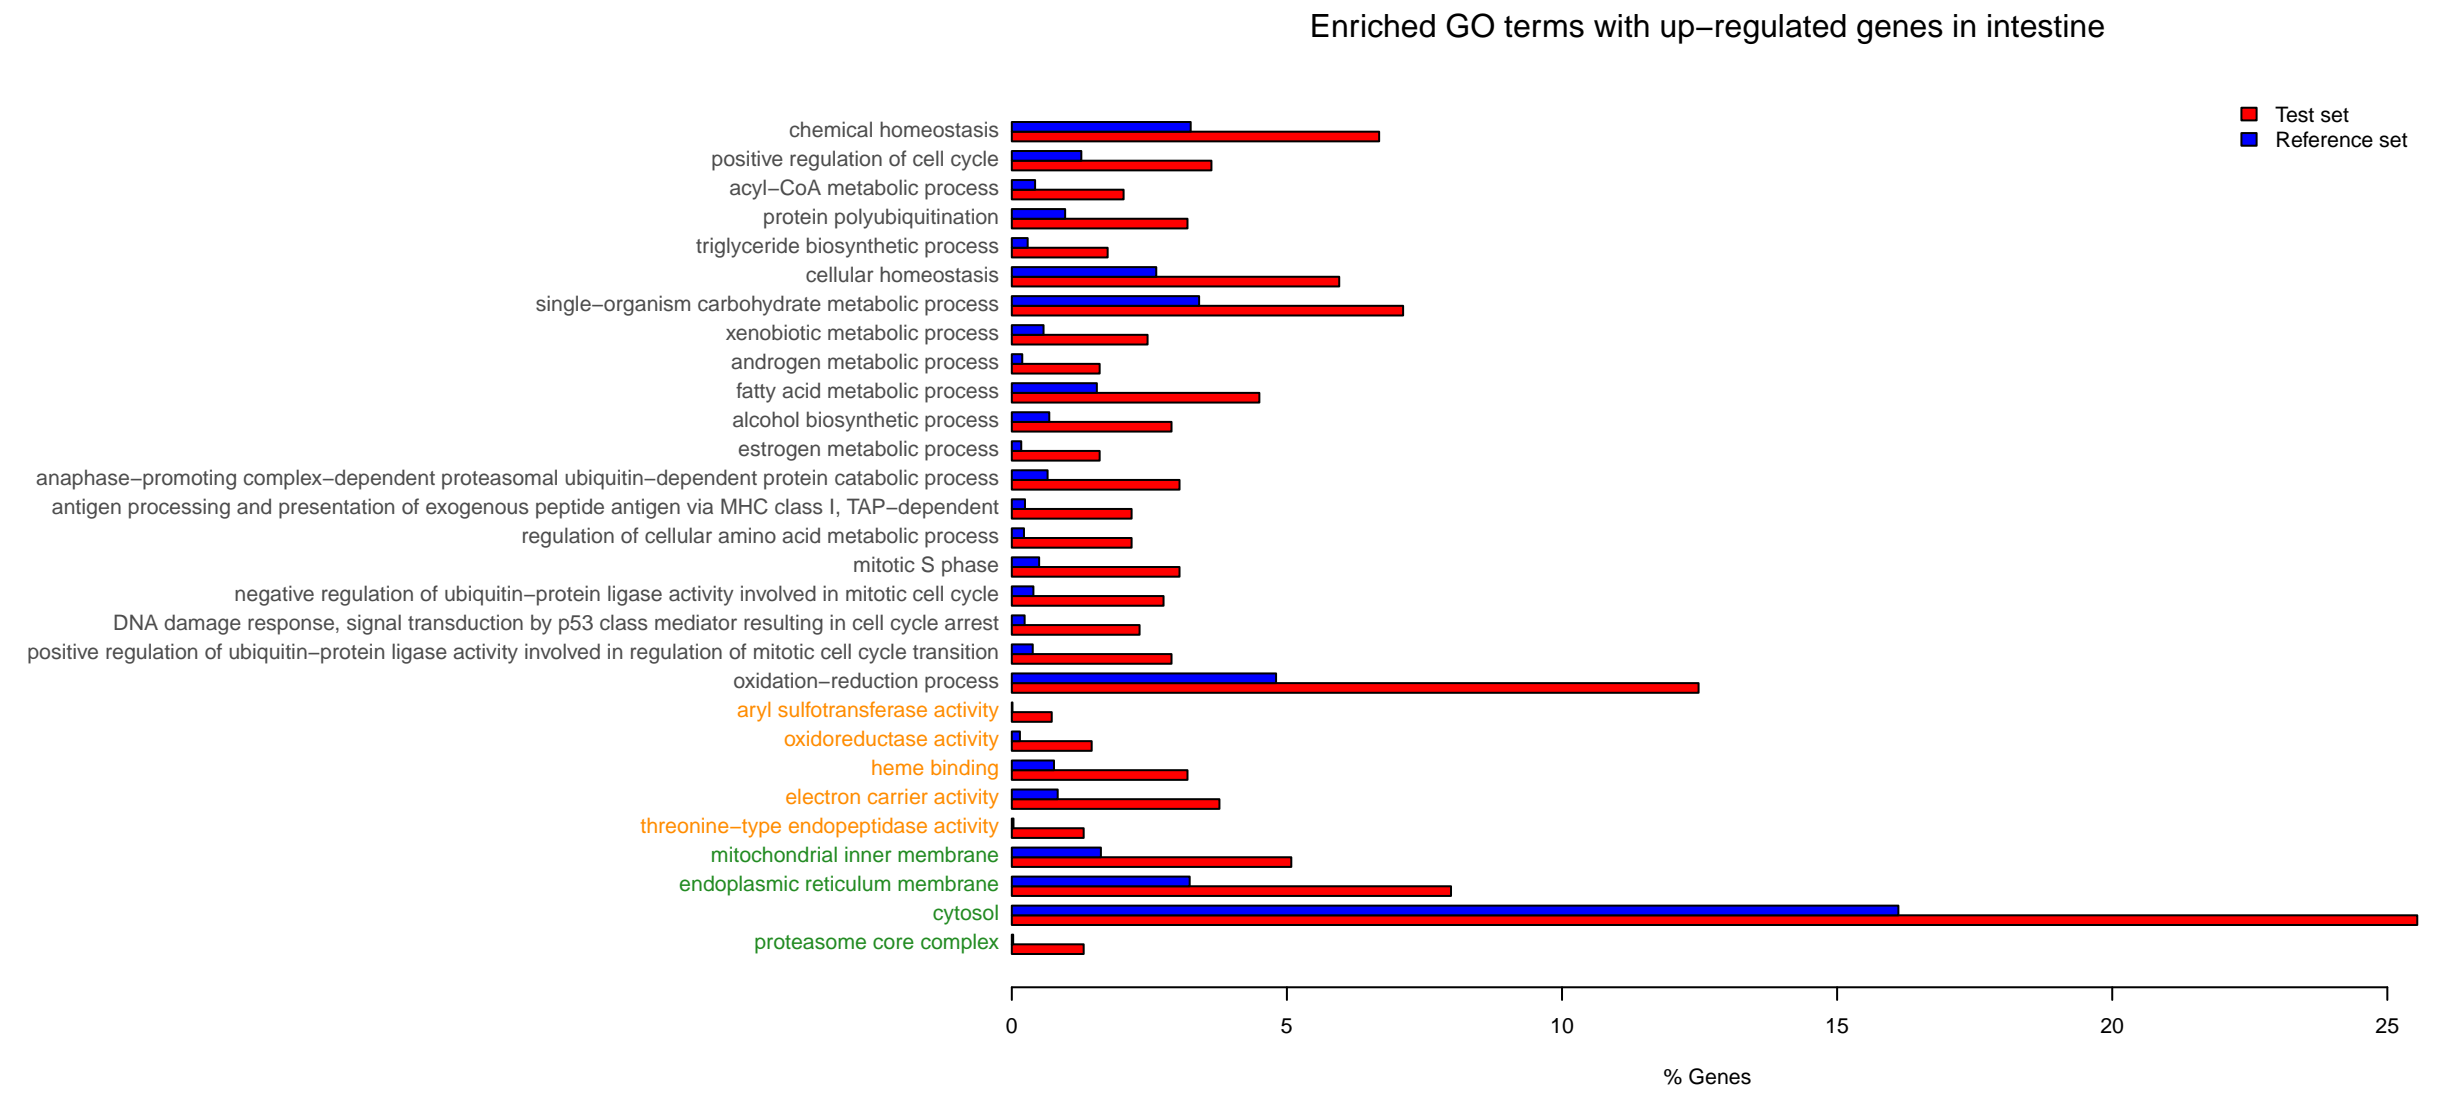

B

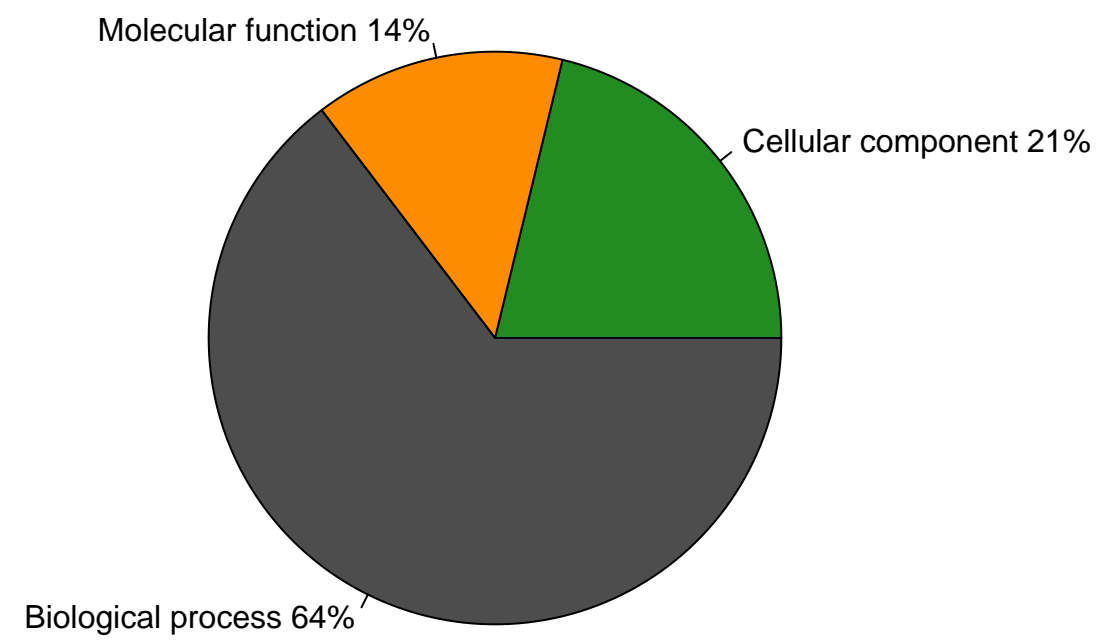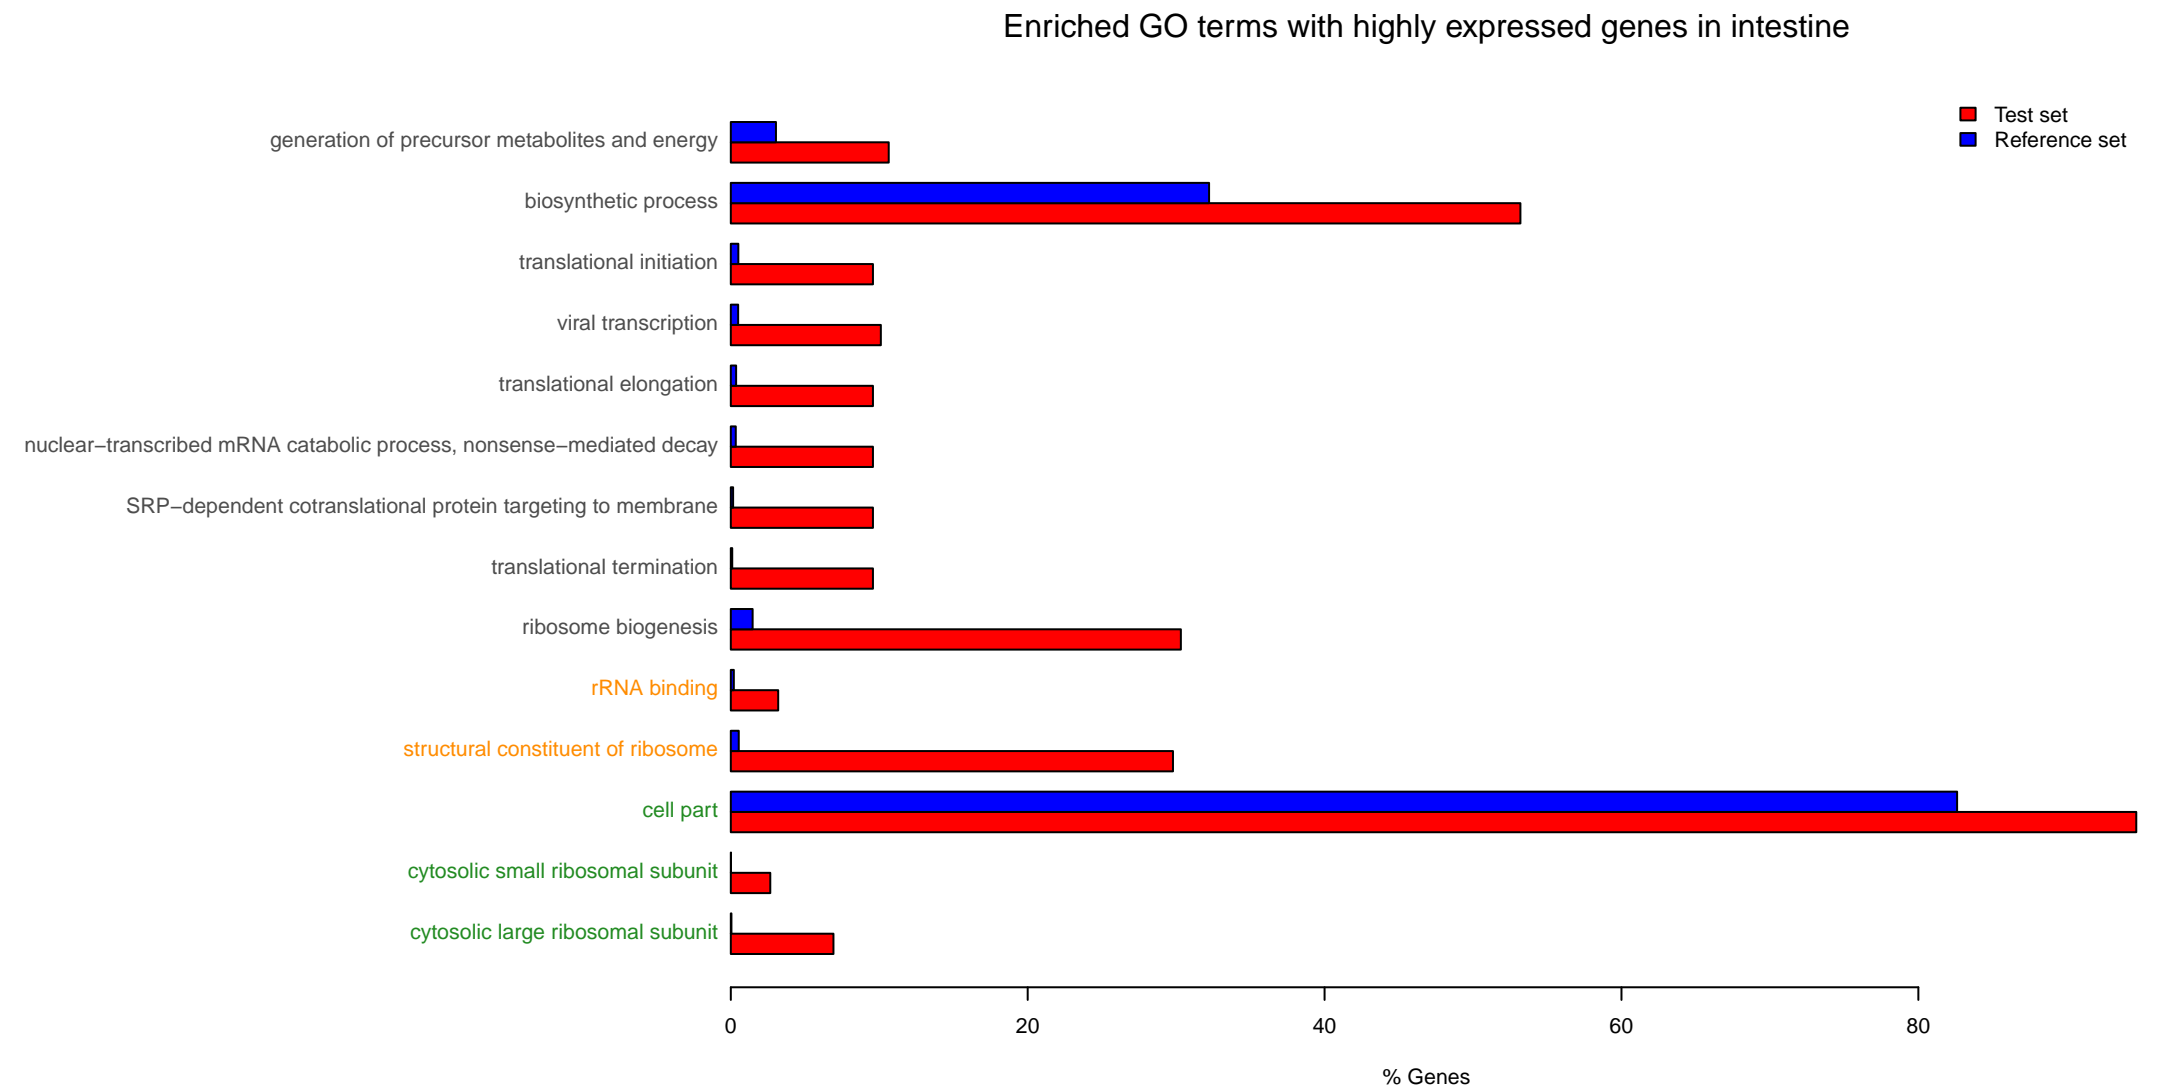

A

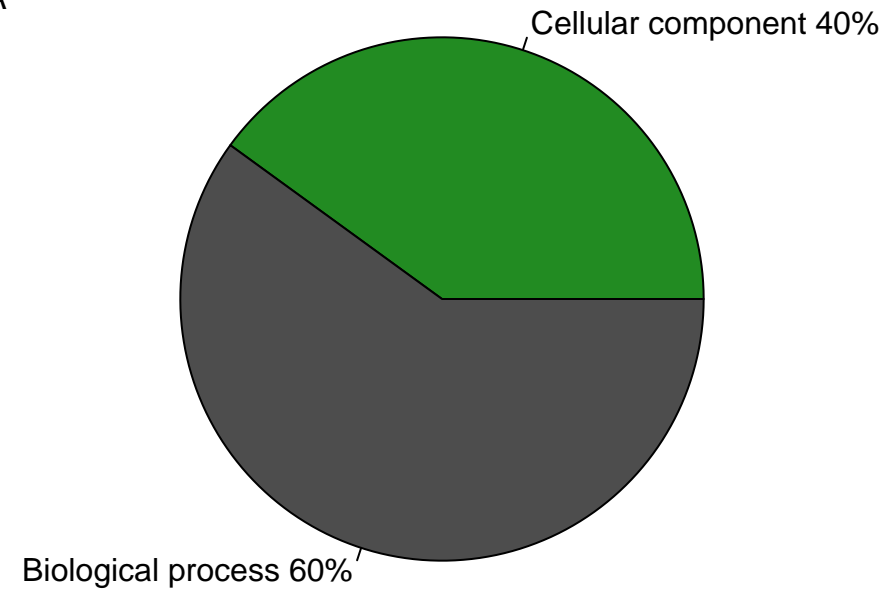

Enriched GO terms with up-regulated genes in pancreas

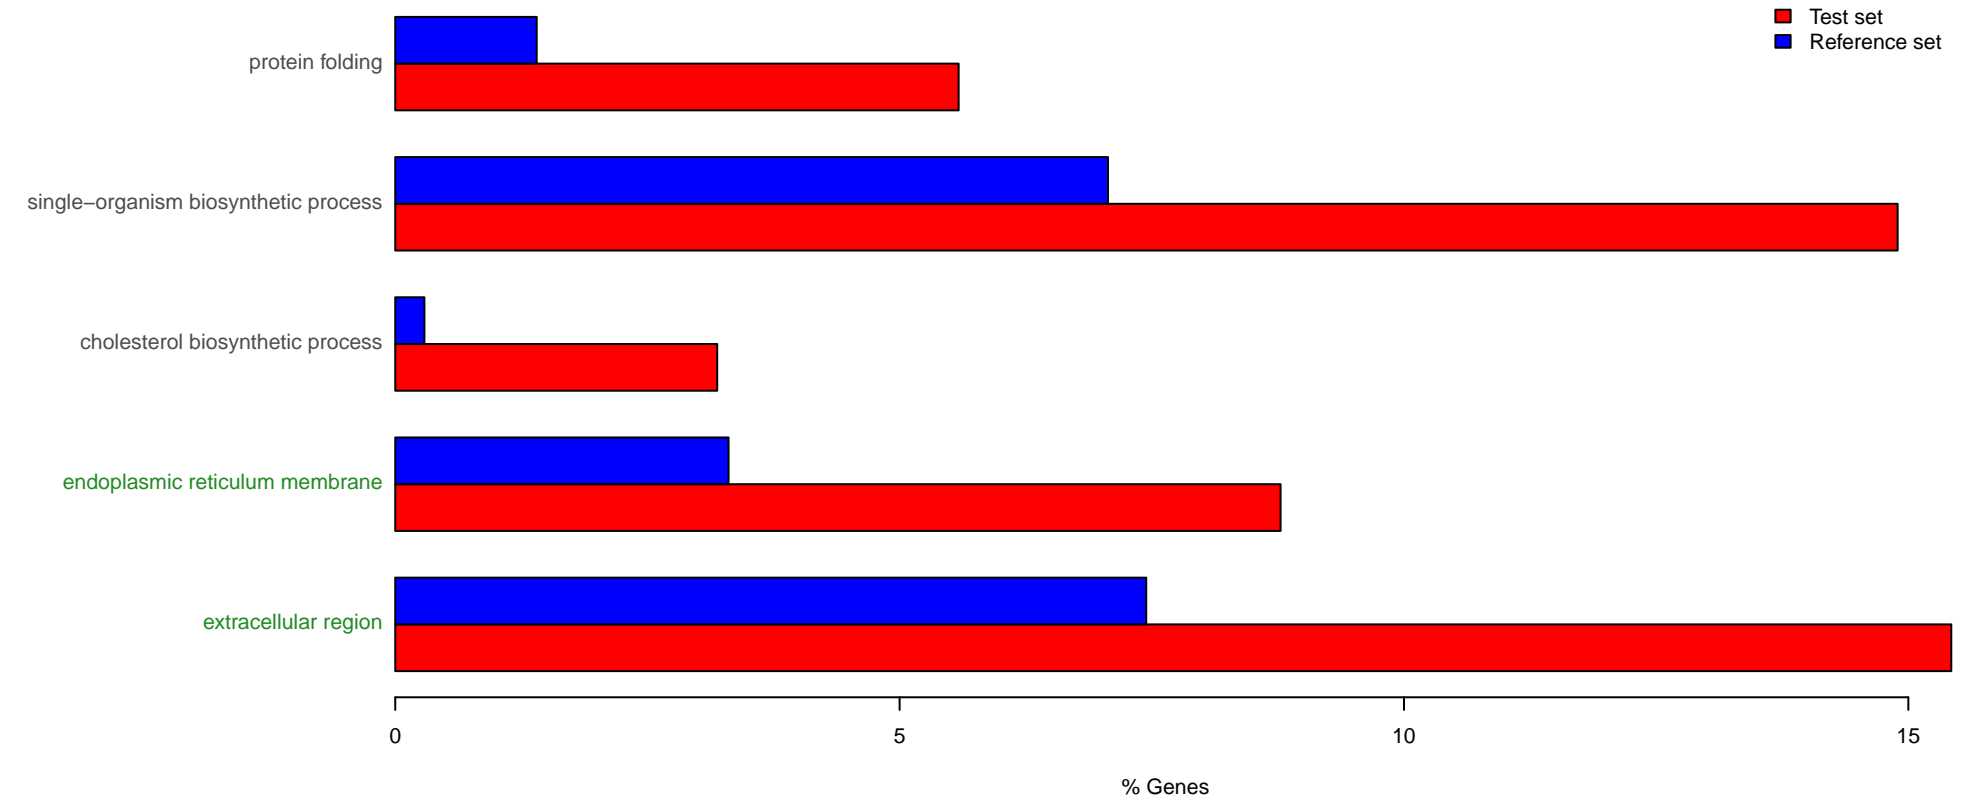

B

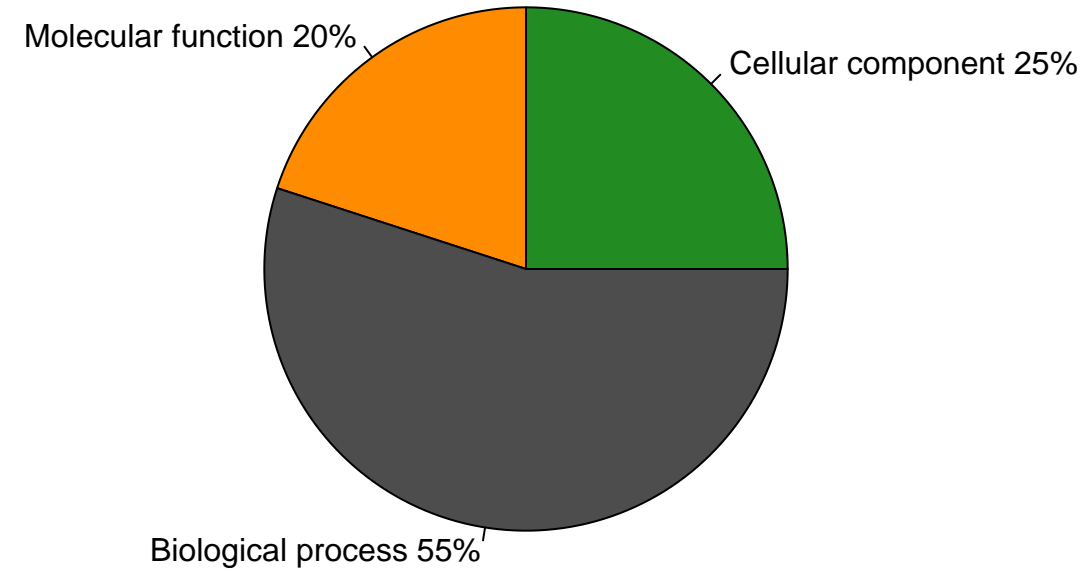

Enriched GO terms with highly expressed genes in pancreas

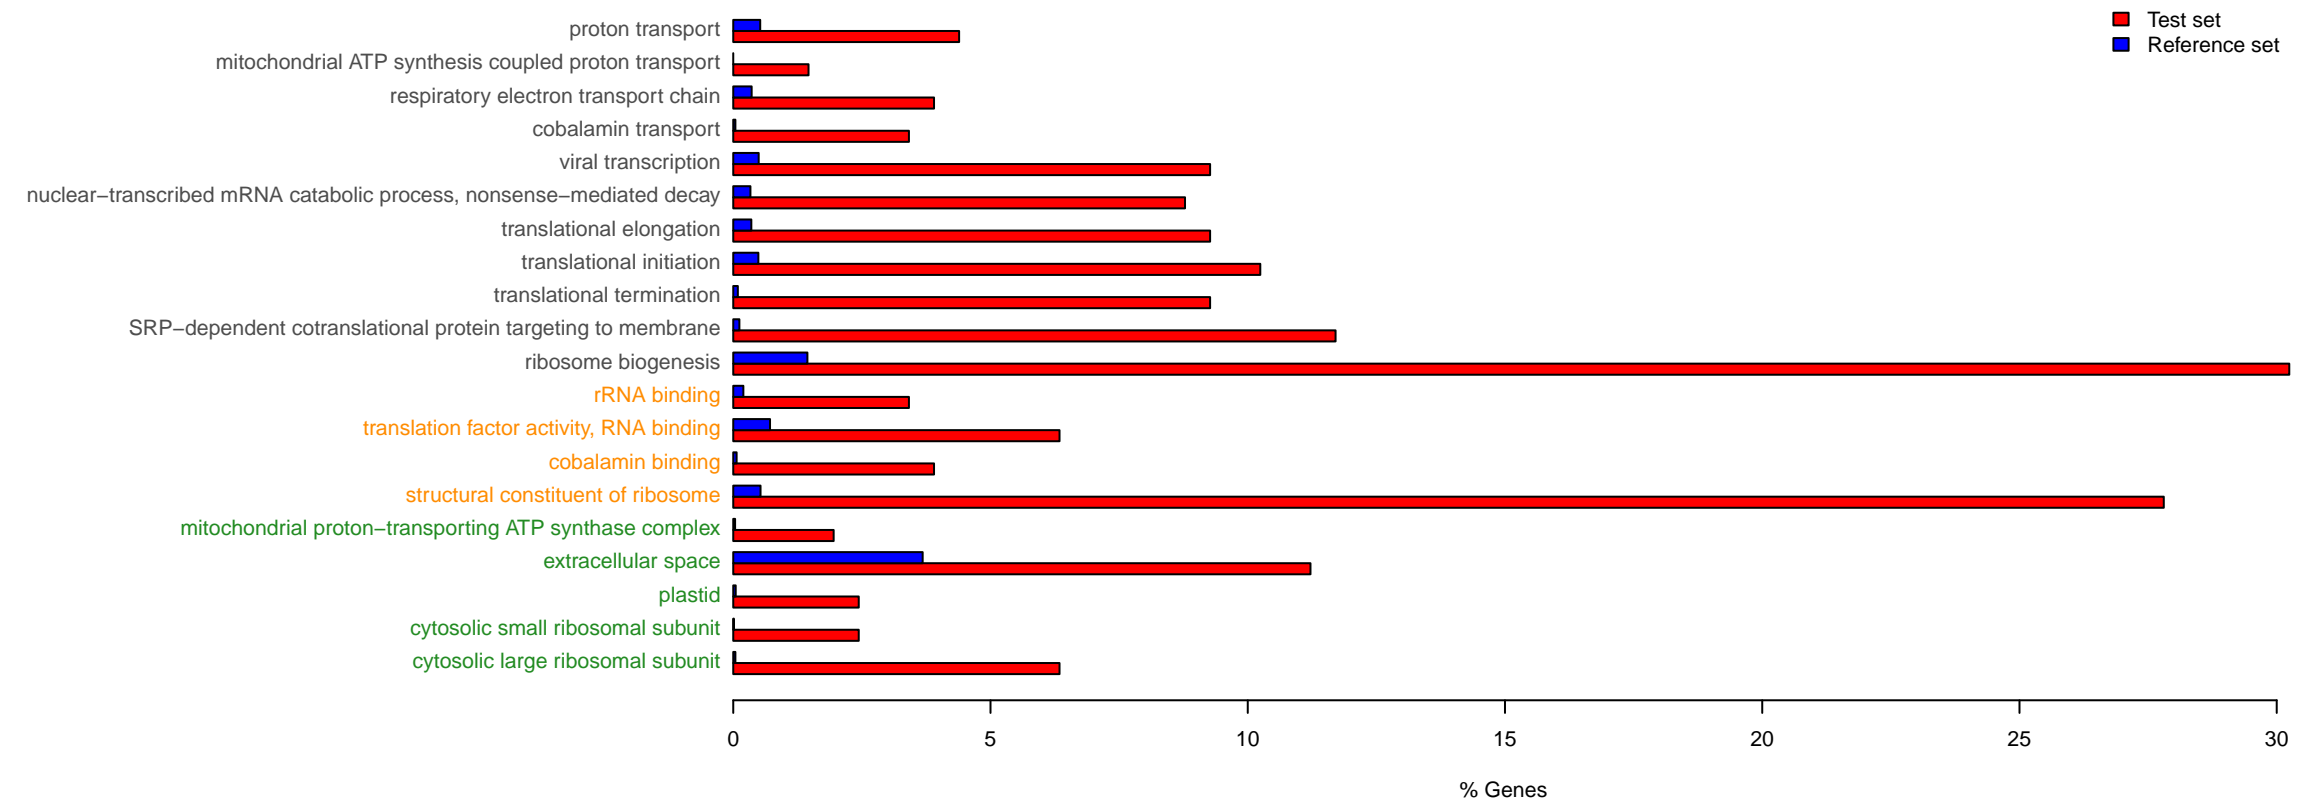

Enriched GO terms with up-regulated genes in liver

A

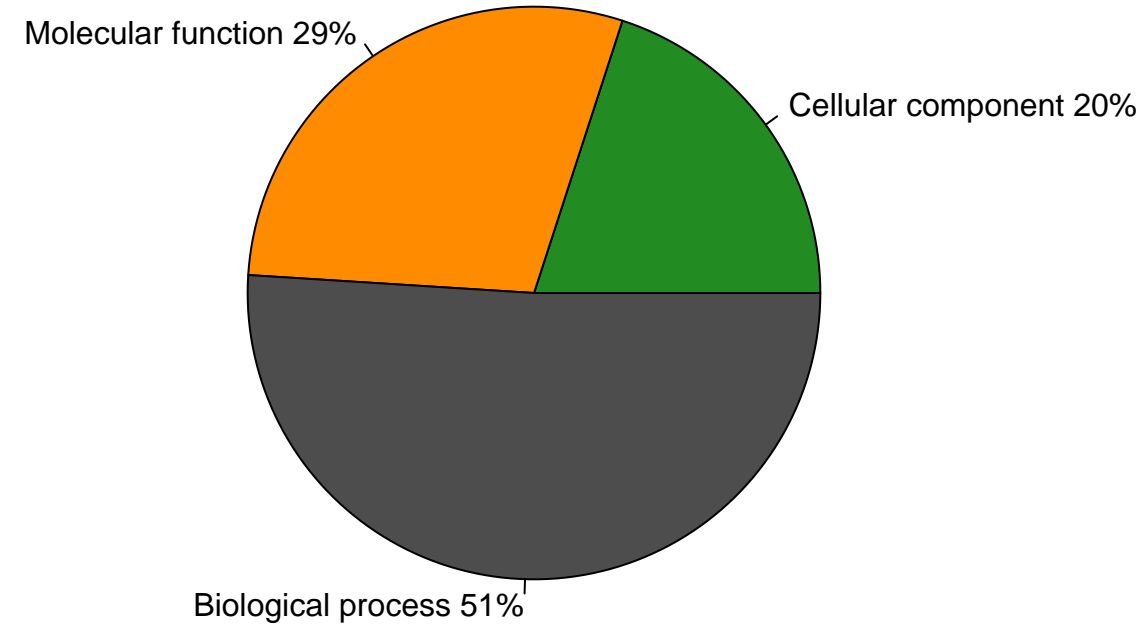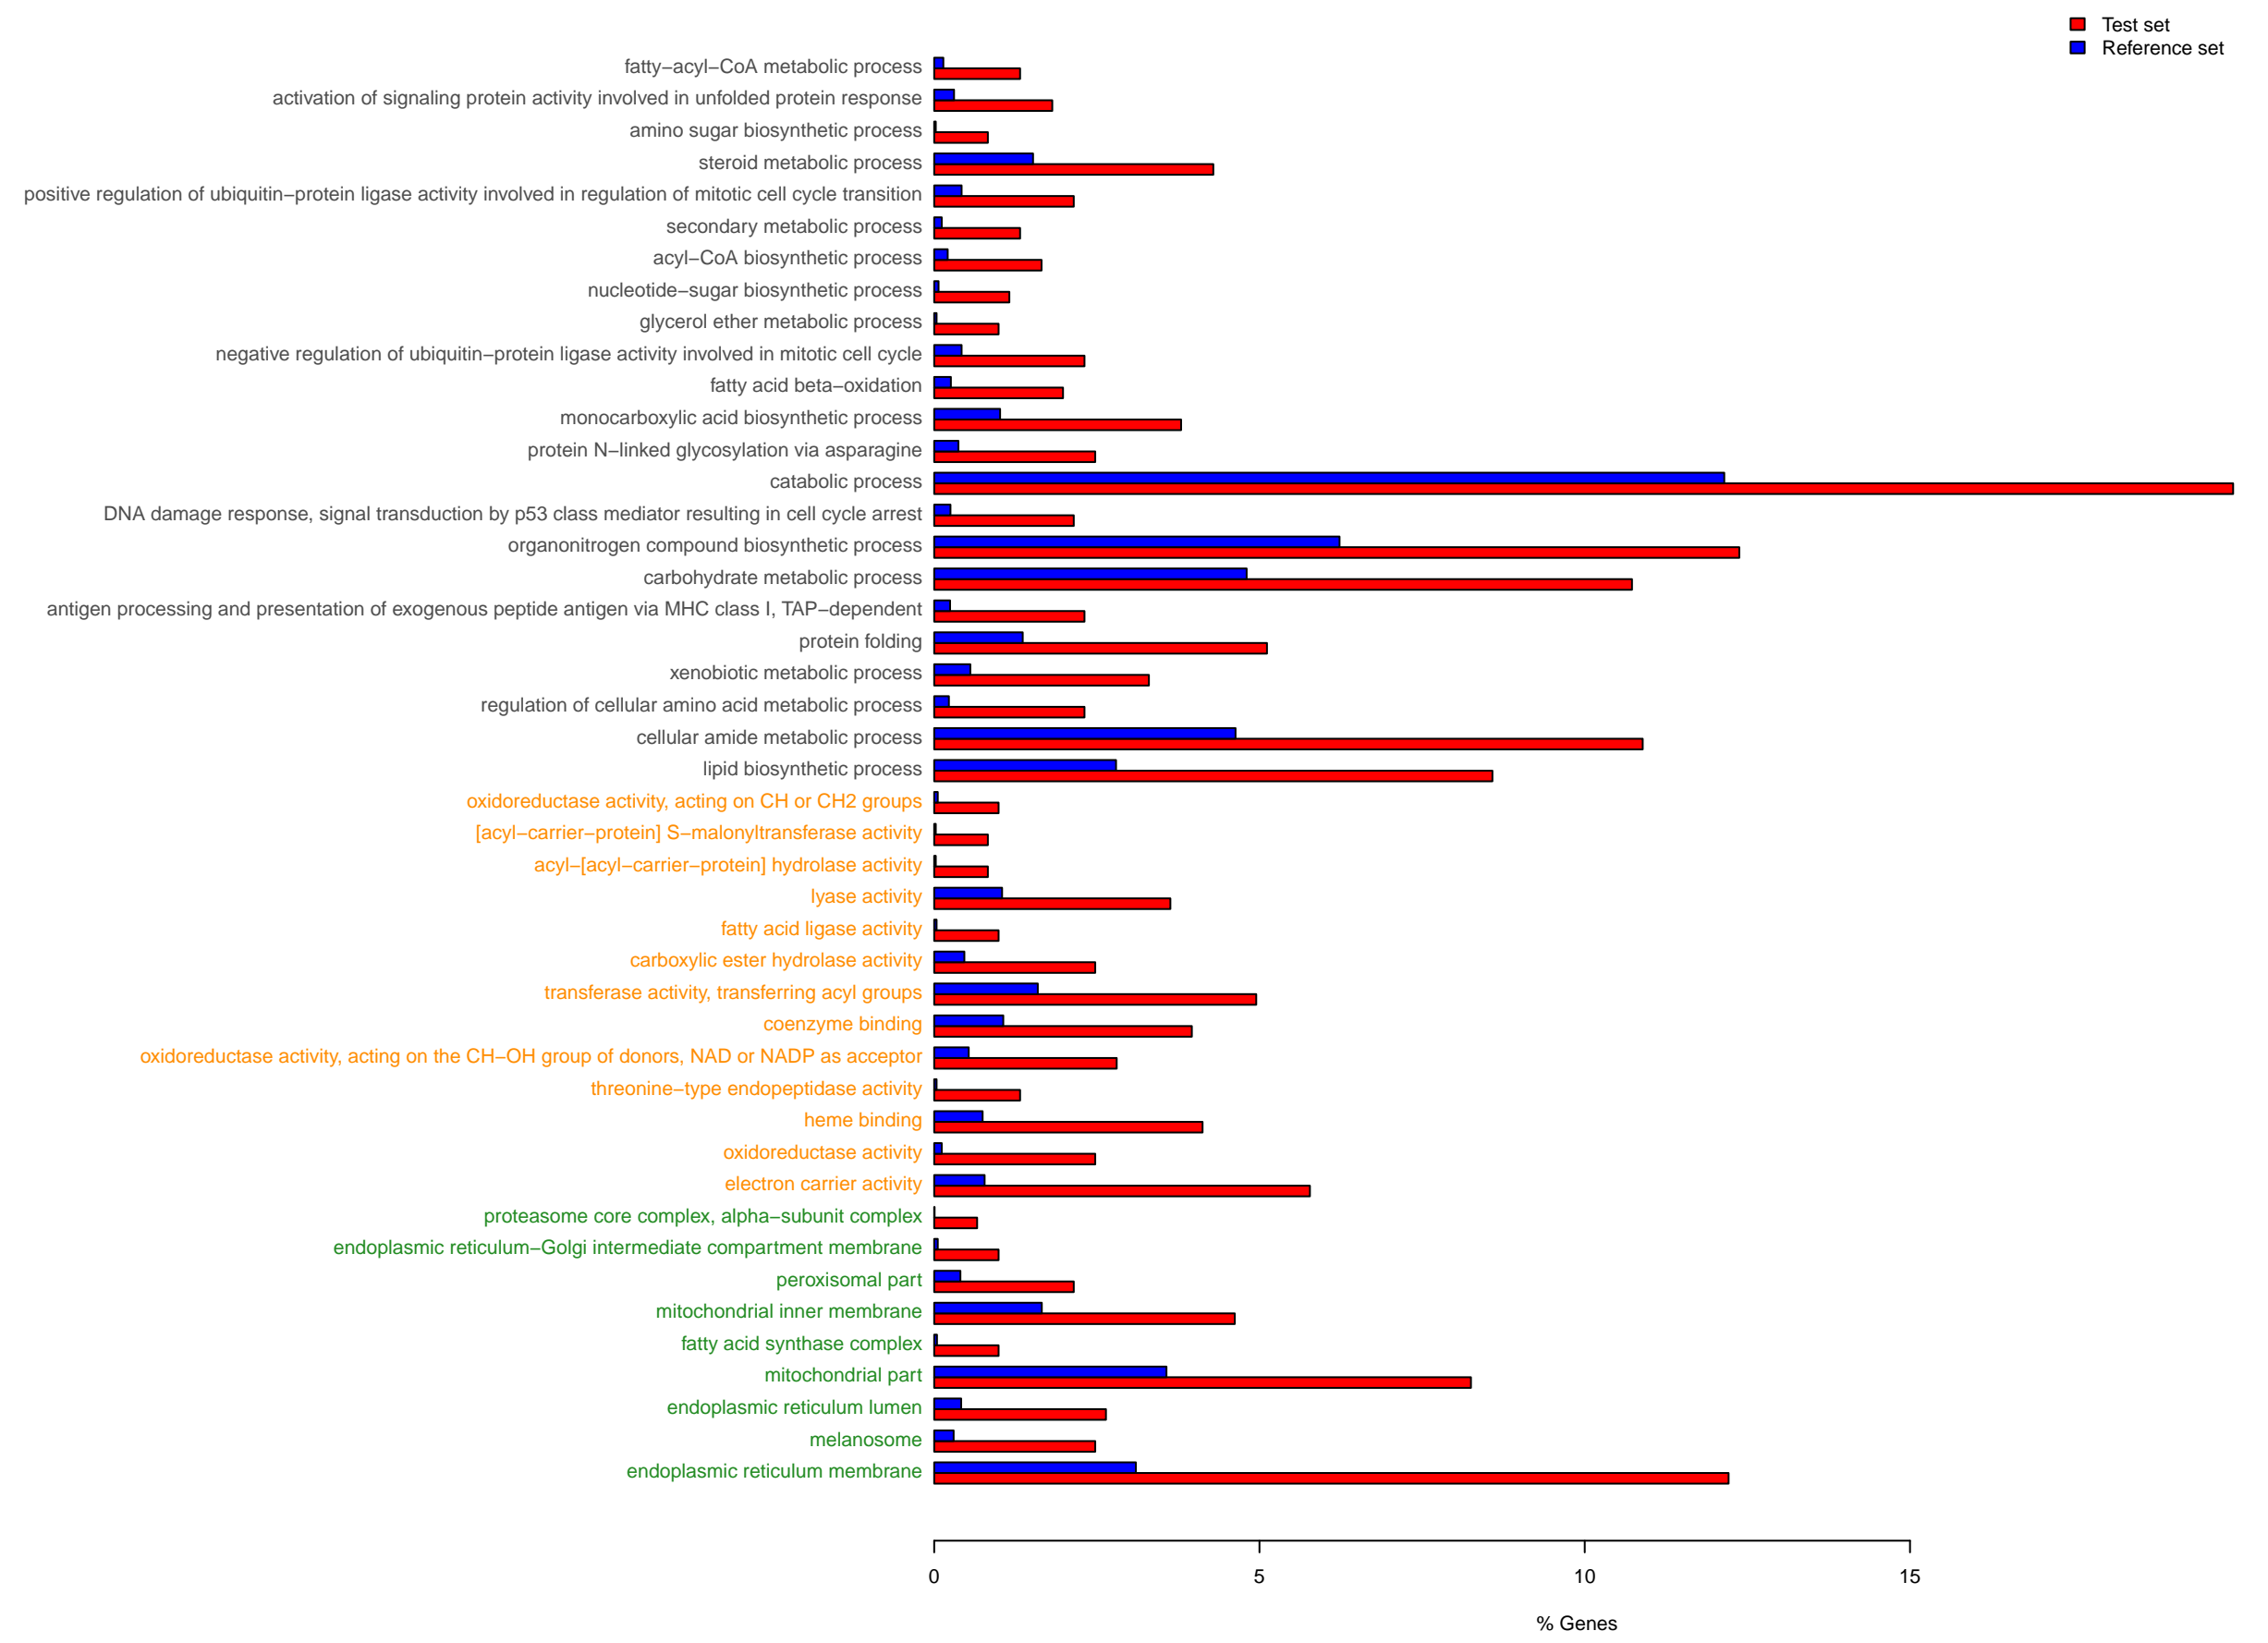

Enriched GO terms with highly expressed genes in liver

B

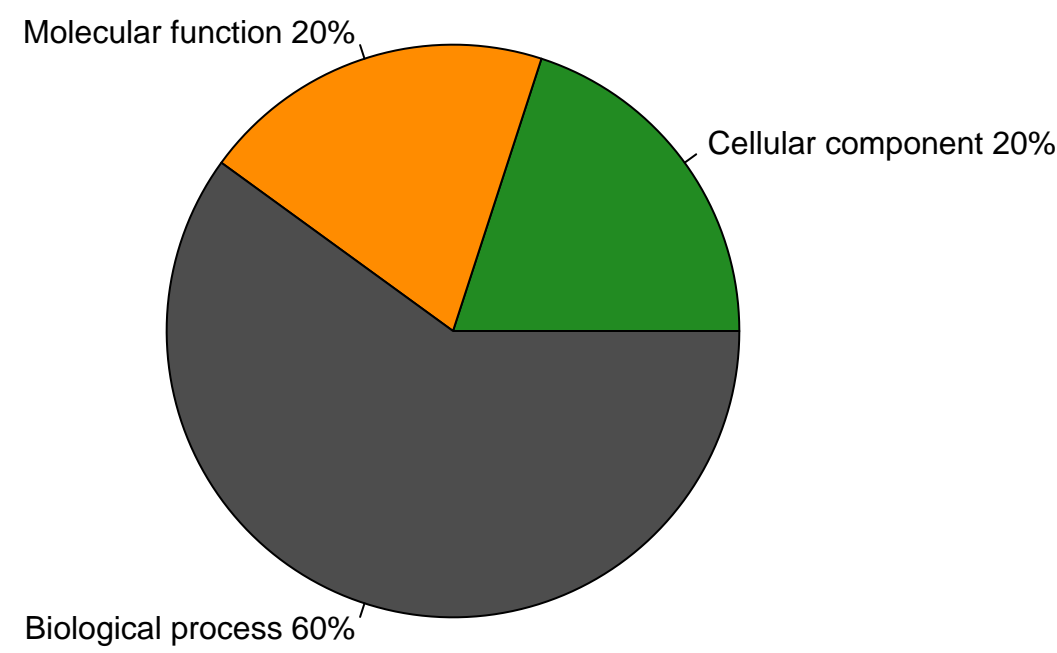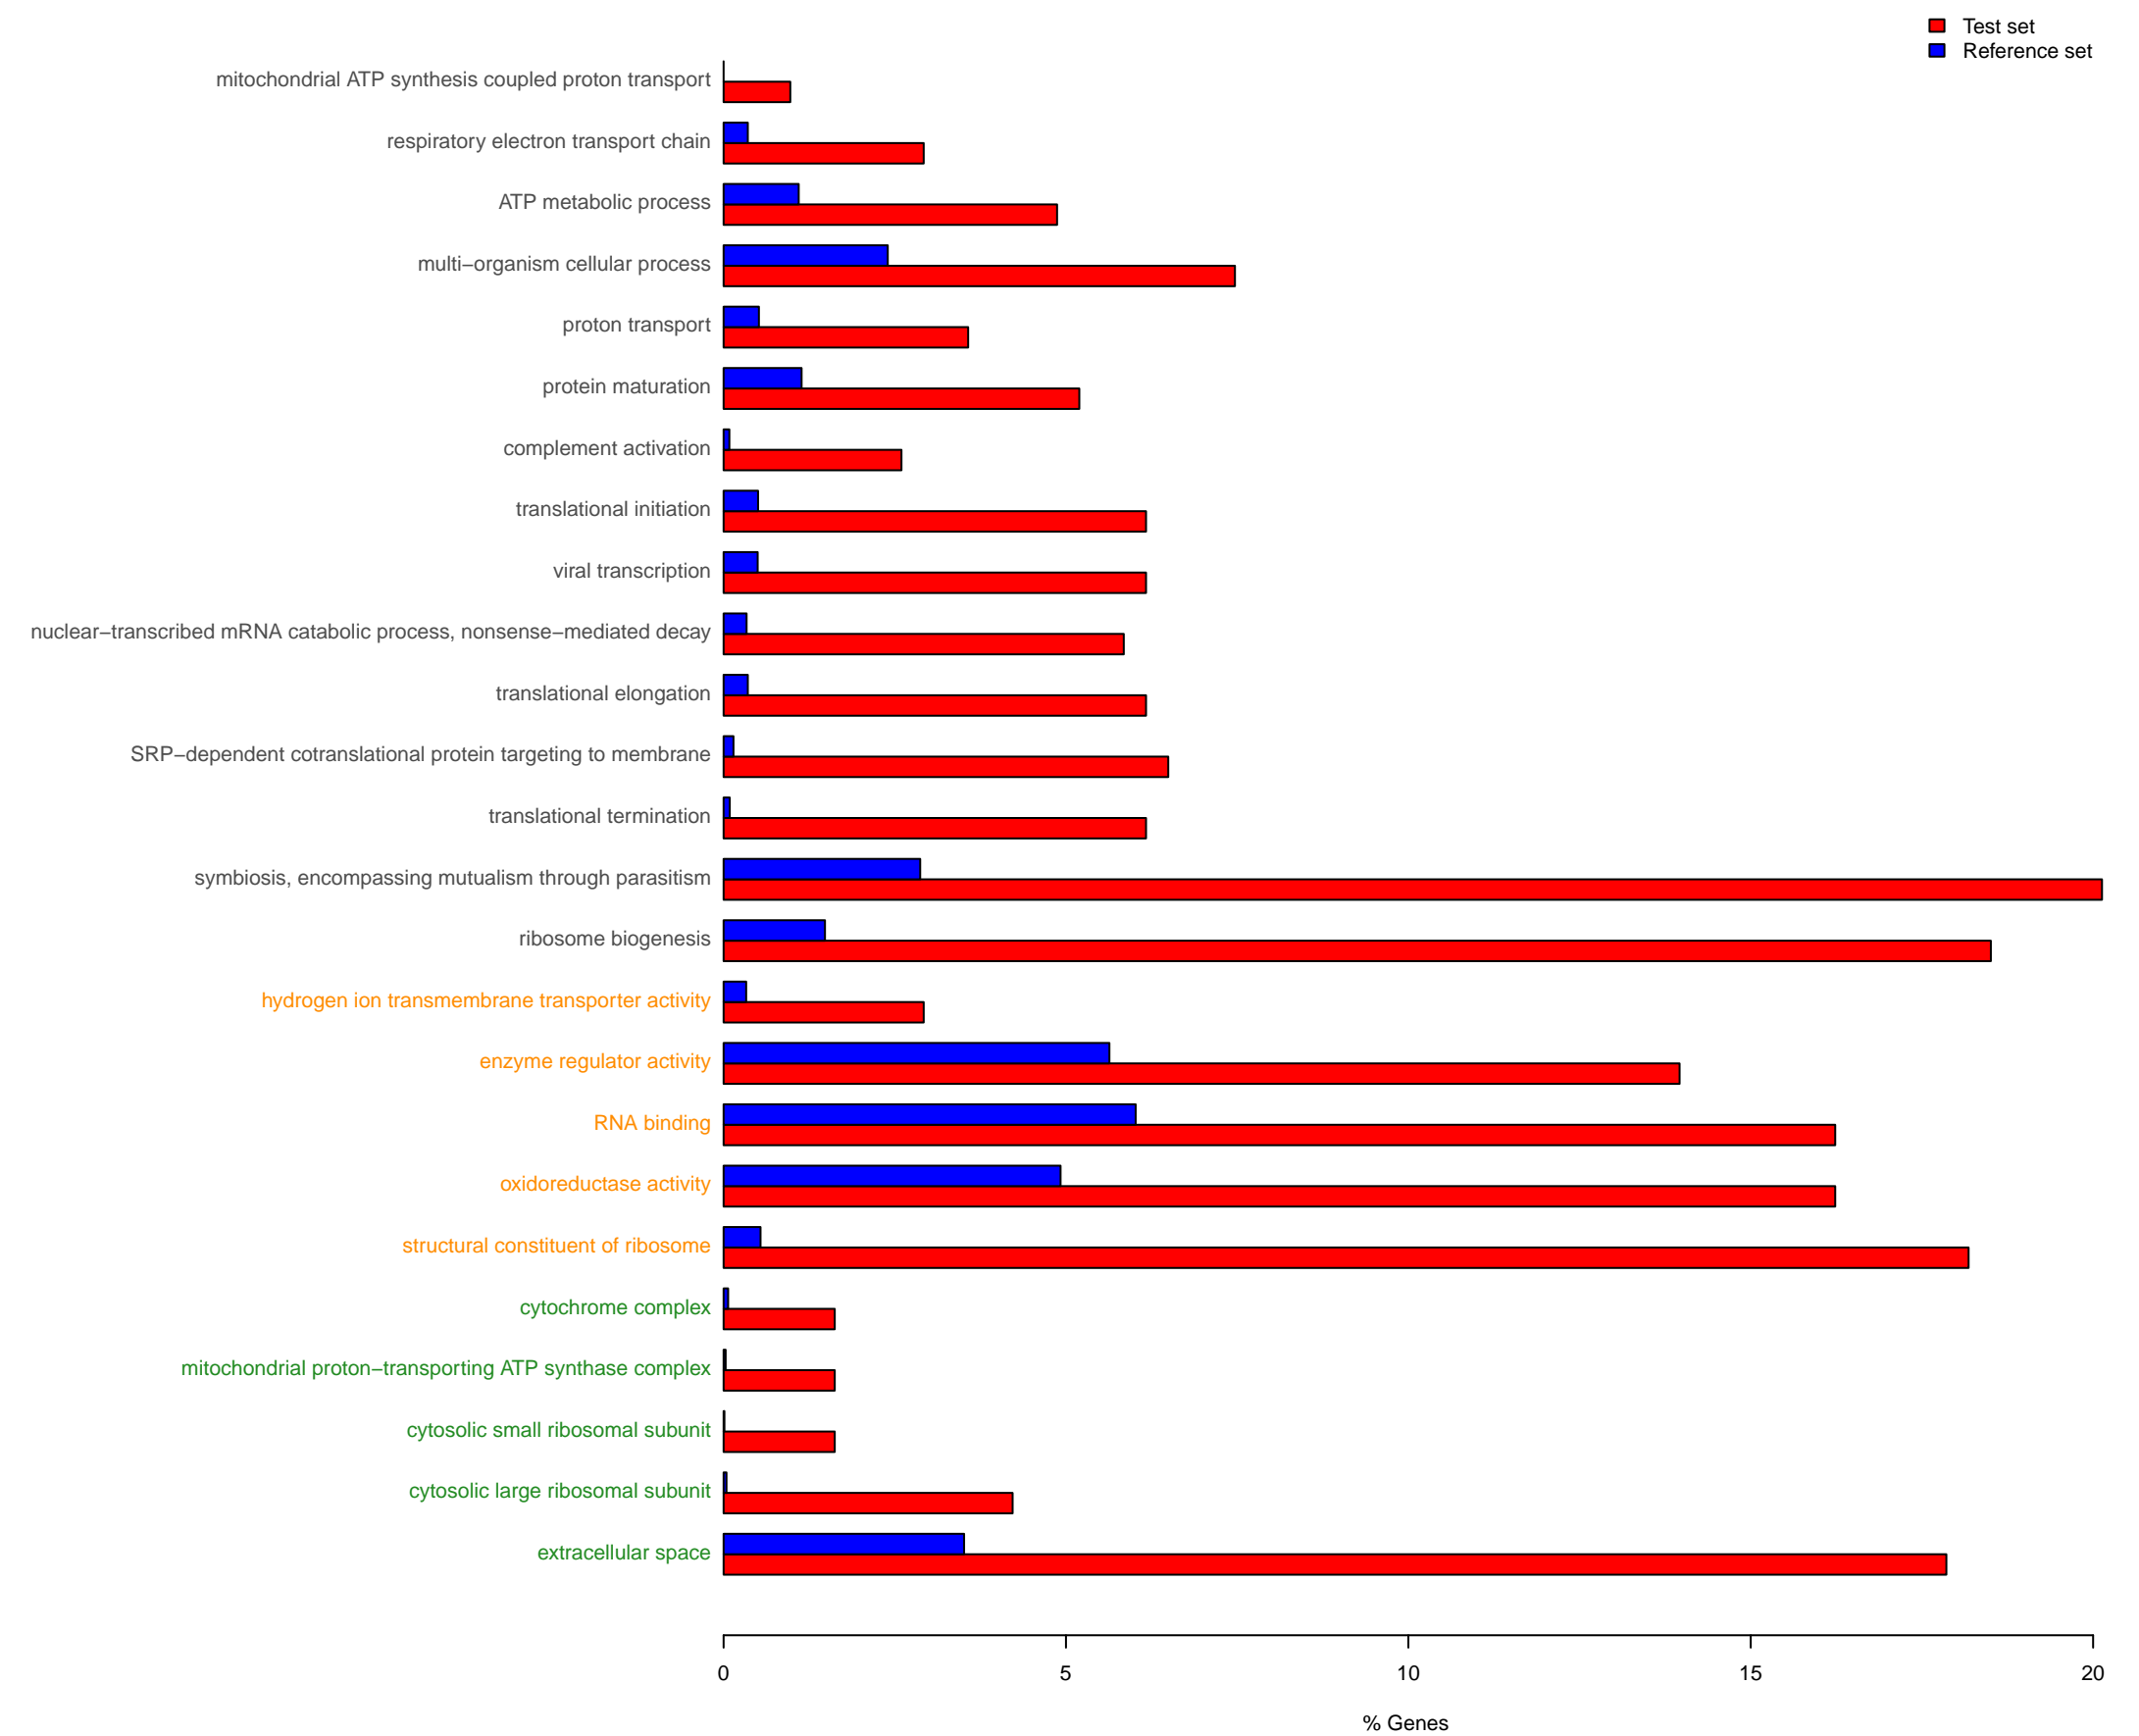

A

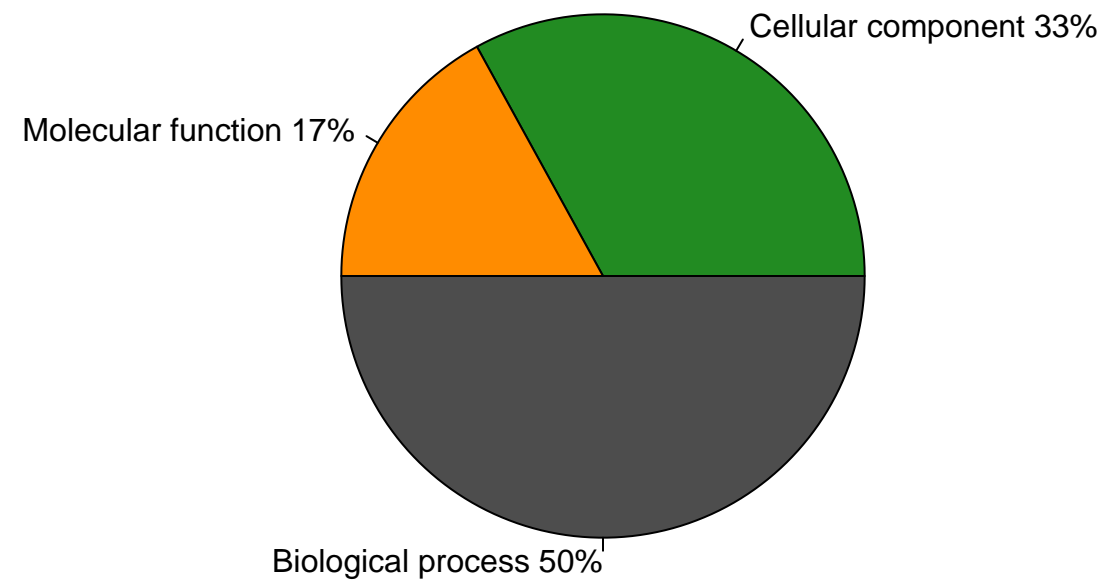

Enriched GO terms with up-regulated genes in heart

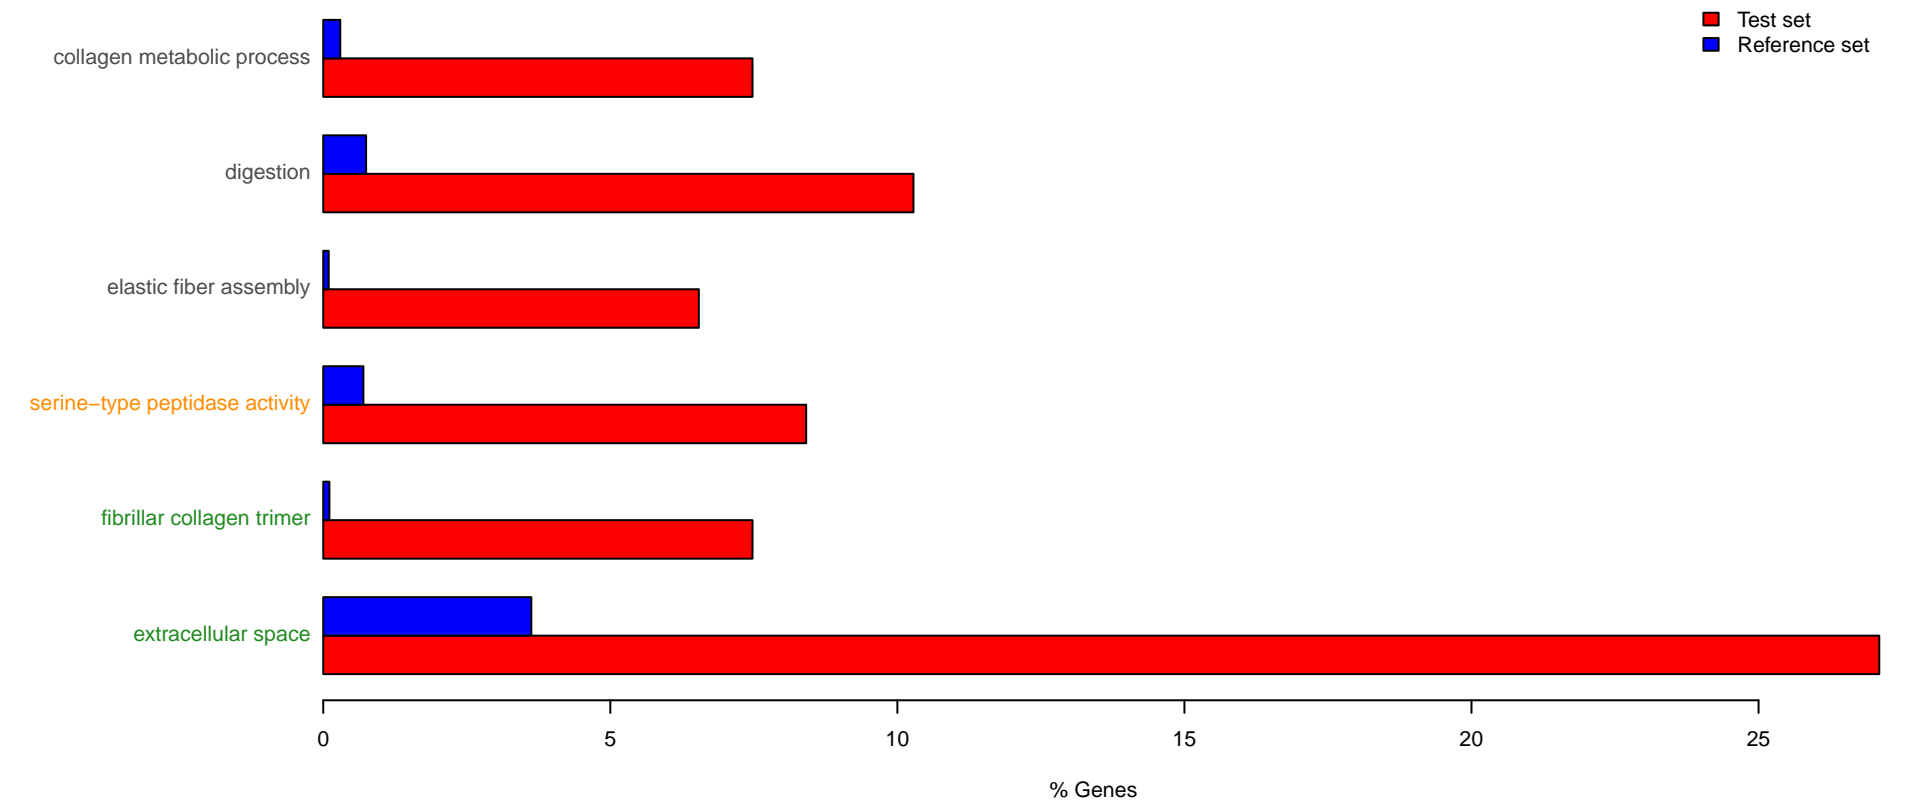

B

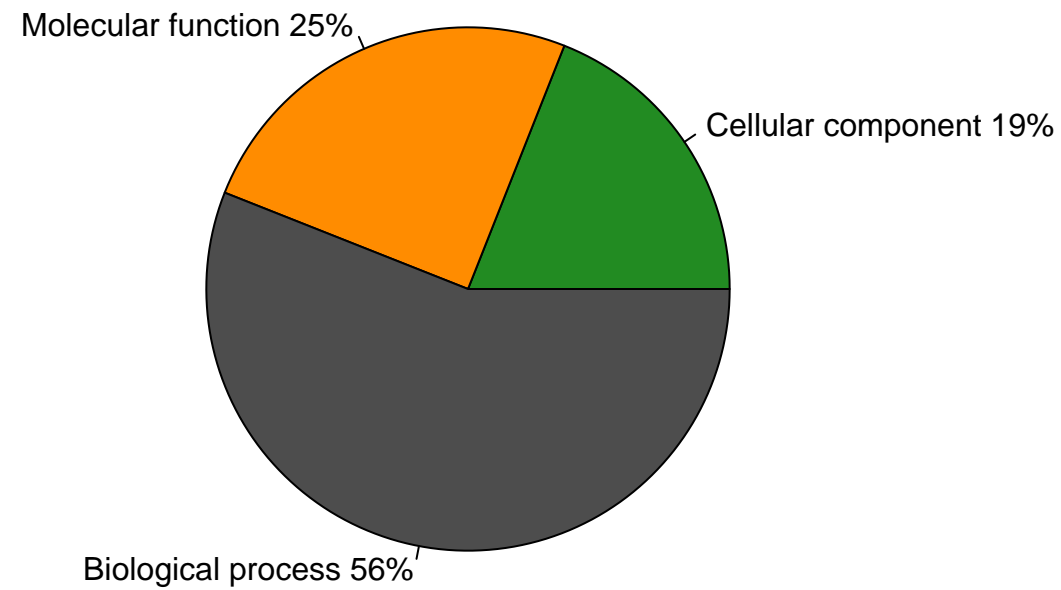

Enriched GO terms with highly expressed genes in heart

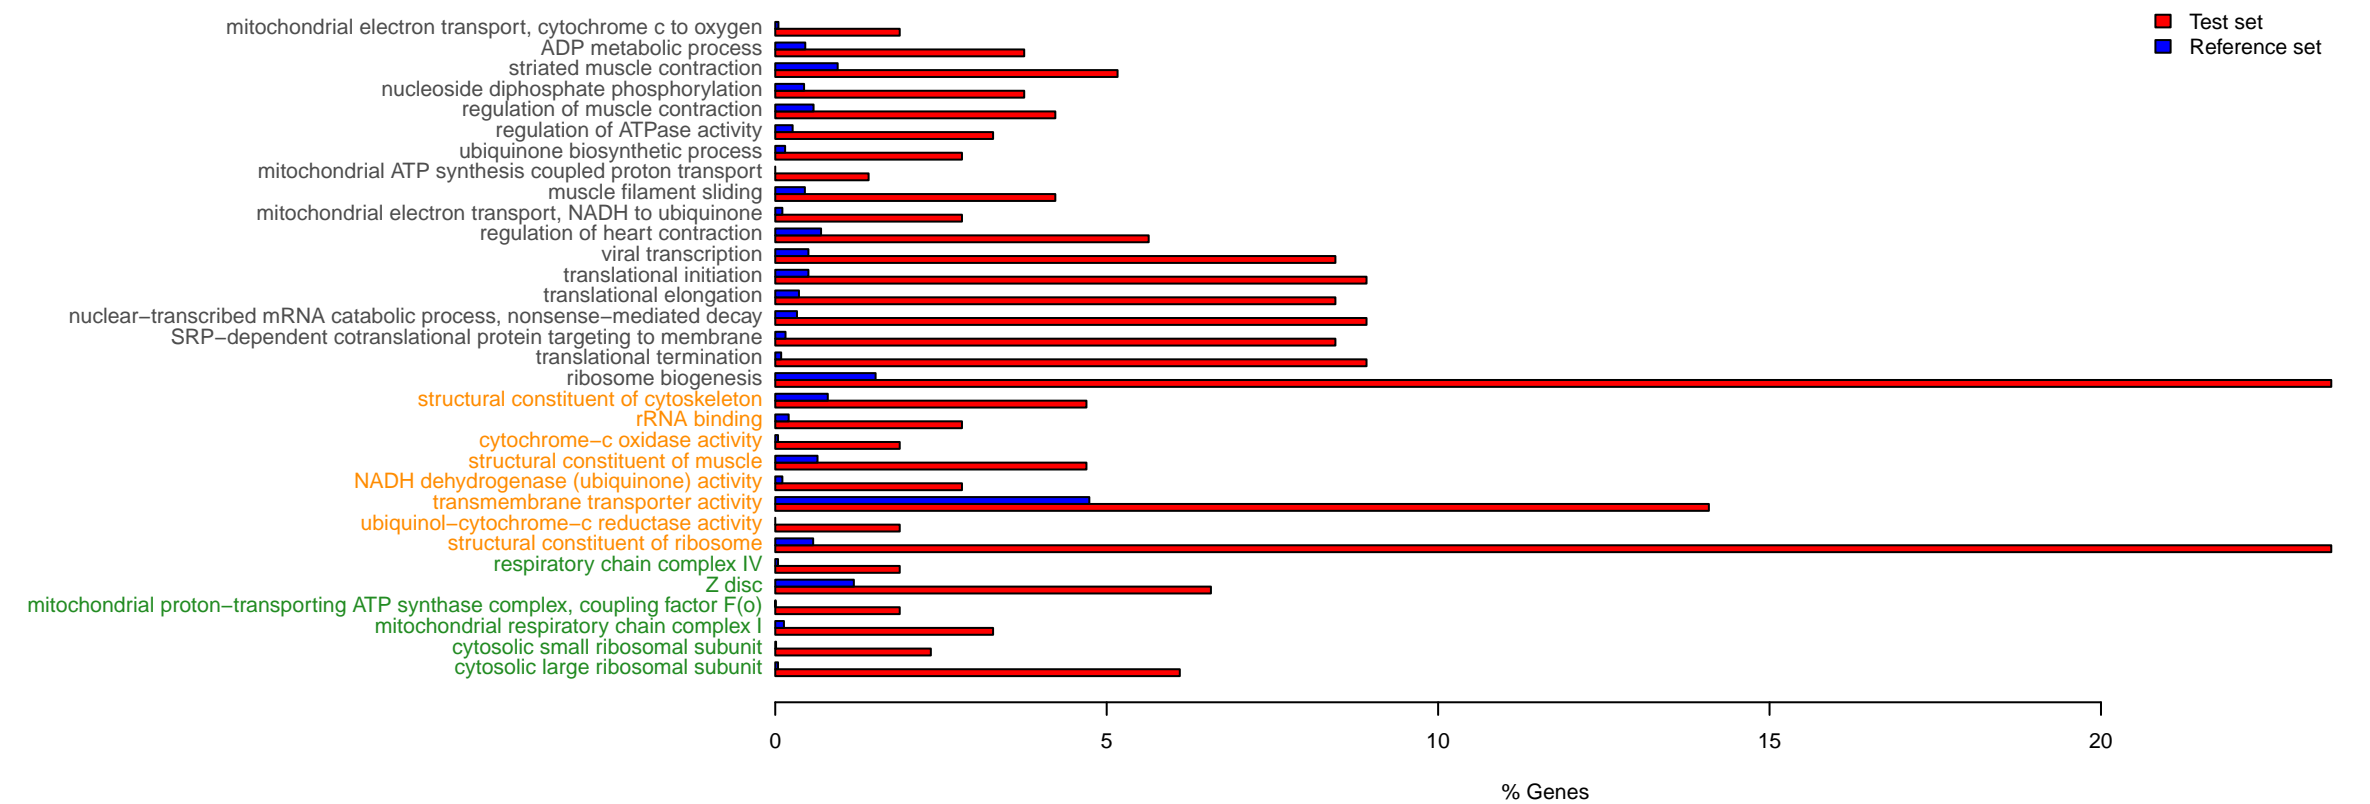

1. Sampling of digestive fluid

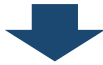

2. Recovery, denaturation, and trypsin treatment of digestive fluid proteins

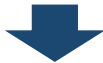

3. LC-MS/MS analyses

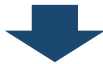

4. Protein identification

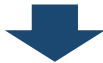

5. Identification of the python stomach secretome



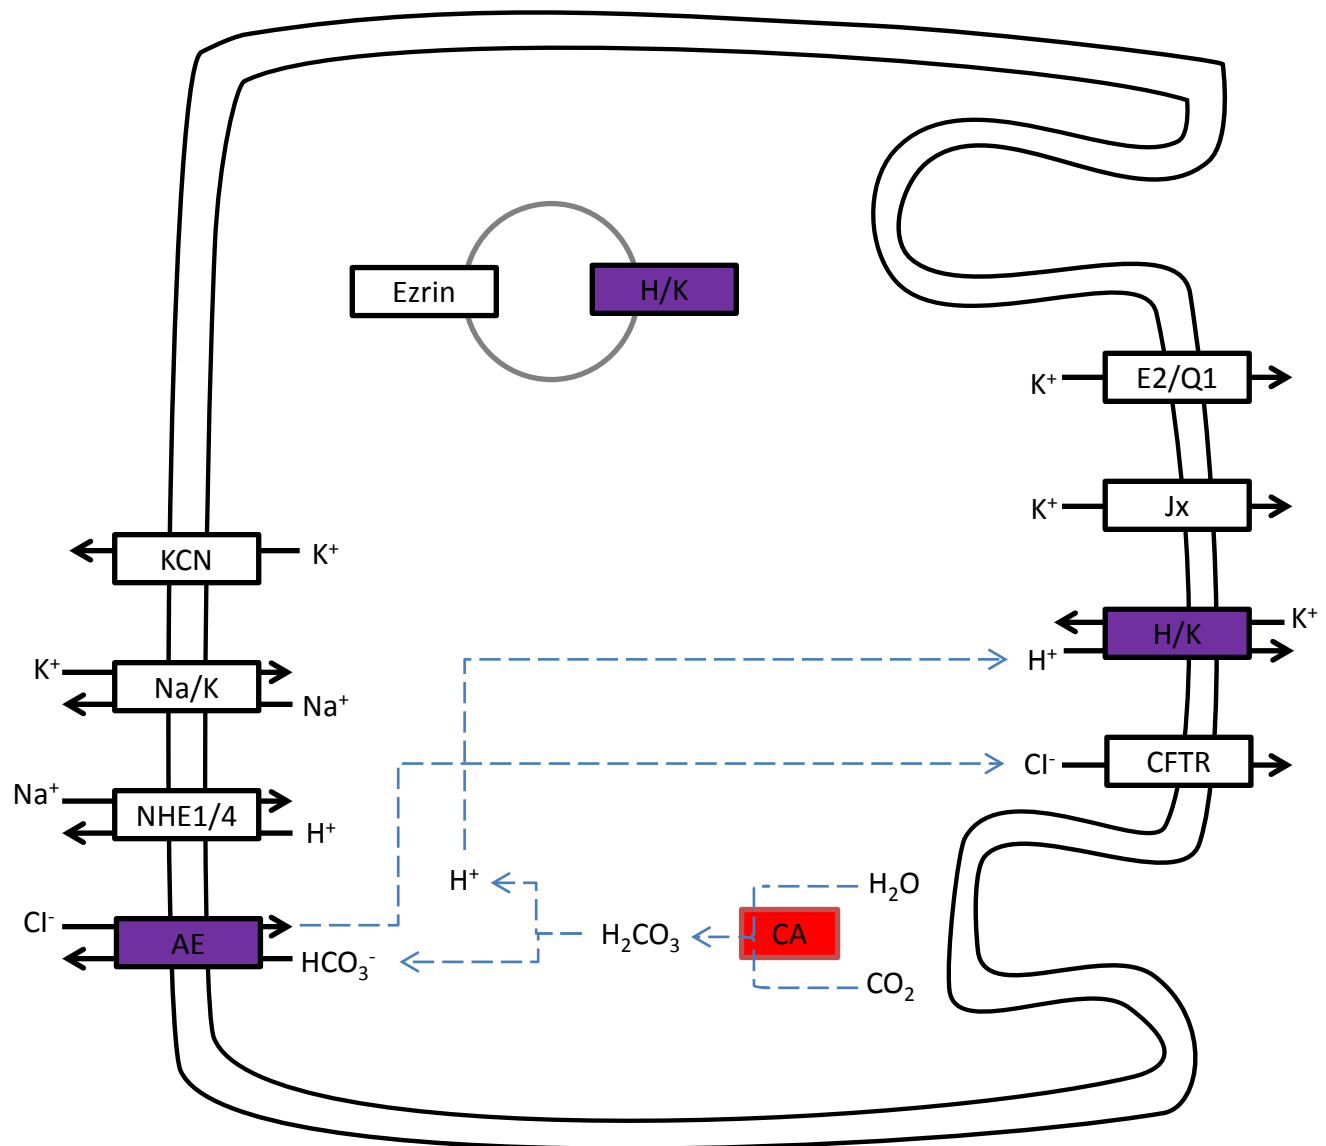



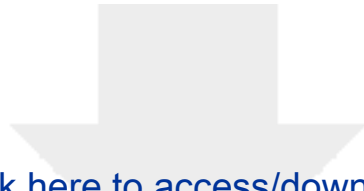

Click here to access/download  
**Supplementary Material**  
supplementary document.docx

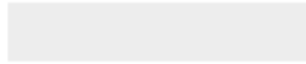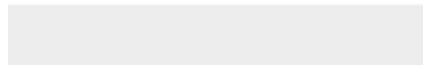

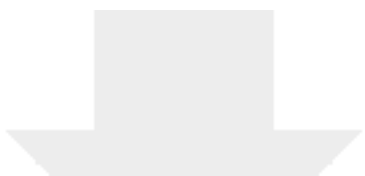

Click here to access/download  
**Supplementary Material**  
TableS4.xlsx





Click here to access/download  
**Supplementary Material**  
TableS5.xlsx





Click here to access/download  
**Supplementary Material**  
TableS6.xlsx





Click here to access/download  
**Supplementary Material**  
TableS7.xlsx



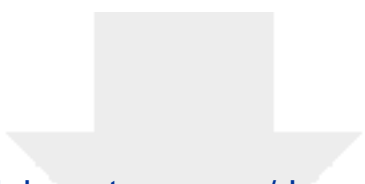

Click here to access/download  
**Supplementary Material**  
TableS8.xlsx





Click here to access/download  
**Supplementary Material**  
TableS9.xlsx





Click here to access/download  
**Supplementary Material**  
TableS10.xlsx





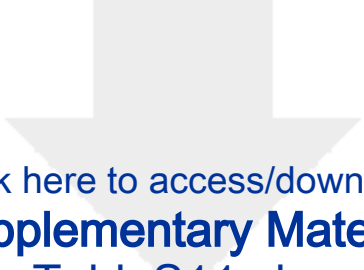

Click here to access/download  
**Supplementary Material**  
TableS11.xlsx





Click here to access/download  
**Supplementary Material**  
FigureS3.pdf
