# Supplementary material for: Transcriptome analysis of the response of Burmese python to digestion
Source: PubMed Central journal article supplement (PMC5597892; doi:10.1093/gigascience/gix057), 2017-07-13
Supplement: gix057_Reviewer-1_Revision-1-(Attachment).pdf [file gix057_Reviewer-1_Revision-1-%28Attachment%29.pdf]

|                                                                                      |                                                                                                                                                                                                                                                                                                                                                                                                                                                                                                                                                                                                                                                                                                                                                                                                                                                                                                                                                                                                                                                                                                                                                                                                                                                                                                                                                                                                                                                                                                                                                                                                                                                                                                                                                                                                                                                                                                                    |
|--------------------------------------------------------------------------------------|--------------------------------------------------------------------------------------------------------------------------------------------------------------------------------------------------------------------------------------------------------------------------------------------------------------------------------------------------------------------------------------------------------------------------------------------------------------------------------------------------------------------------------------------------------------------------------------------------------------------------------------------------------------------------------------------------------------------------------------------------------------------------------------------------------------------------------------------------------------------------------------------------------------------------------------------------------------------------------------------------------------------------------------------------------------------------------------------------------------------------------------------------------------------------------------------------------------------------------------------------------------------------------------------------------------------------------------------------------------------------------------------------------------------------------------------------------------------------------------------------------------------------------------------------------------------------------------------------------------------------------------------------------------------------------------------------------------------------------------------------------------------------------------------------------------------------------------------------------------------------------------------------------------------|
| <b>Manuscript Number:</b>                                                            | GIGA-D-16-00152R1                                                                                                                                                                                                                                                                                                                                                                                                                                                                                                                                                                                                                                                                                                                                                                                                                                                                                                                                                                                                                                                                                                                                                                                                                                                                                                                                                                                                                                                                                                                                                                                                                                                                                                                                                                                                                                                                                                  |
| <b>Full Title:</b>                                                                   | Transcriptome Analysis of the Response of Burmese Python to Digestion                                                                                                                                                                                                                                                                                                                                                                                                                                                                                                                                                                                                                                                                                                                                                                                                                                                                                                                                                                                                                                                                                                                                                                                                                                                                                                                                                                                                                                                                                                                                                                                                                                                                                                                                                                                                                                              |
| <b>Article Type:</b>                                                                 | Research                                                                                                                                                                                                                                                                                                                                                                                                                                                                                                                                                                                                                                                                                                                                                                                                                                                                                                                                                                                                                                                                                                                                                                                                                                                                                                                                                                                                                                                                                                                                                                                                                                                                                                                                                                                                                                                                                                           |
| <b>Abstract:</b>                                                                     | <p><b>Background:</b><br/>The exceptional and extreme feeding behaviour makes the Burmese python a unique and interesting model to study physiological remodelling and metabolic adaptation in response to feeding after prolonged starvation. With outset in specific hypotheses based on in vivo physiological responses, we use transcriptome sequencing of five visceral organs and three digestive stages to unravel the patterns of changes in the gene expression of Burmese python upon ingestion of a large meal. We first used the combined data to perform a de novo assembly of the transcriptome. We supplemented with a proteomic survey of enzymes in the gastric juice, stomach secretome and plasma during digestion assisted by our transcriptome sequence database.</p> <p><b>Results:</b><br/>We constructed a high-quality transcriptome with 34,423 transcripts of which 19,713 (57%) were annotated. Among highly expressed genes (FPKM&gt;100 in one tissue) we found differential expression for 43 genes in heart, 206 genes in liver, 114 genes in stomach, 89 genes in pancreas and 158 genes in intestine. We interrogated the function of these genes in order to test previous hypothesis on the response to feeding. We also used the transcriptome to identify 314 secreted proteins in the python gastric juice.</p> <p><b>Conclusions:</b><br/>We provide comprehensive transcriptome data of multiple organs and various digestive time of Burmese python and address specific hypothesis on certain pathways known to related digestion process. We also identify, for the first time, stomach-related proteins from a digesting individual and thereby demonstrate that the sensitivity of modern LC-MS/MS equipment allows the identification of gastric juice proteins that are present during digestion thereby providing novel insight into the digestion mechanism.</p> |
| <b>Response to Reviewers:</b>                                                        | <p>Dear Editor,</p> <p>Thank you for returning the constructive and useful comments from the two reviewers that kindly evaluated our manuscript entitled "Transcriptome Analysis of the Response of Burmese Python to Digestion" that we submitted for publication in GigaScience. Both reviewers provided positive overall assessments, but also raised a number of specific queries to be addressed in the revision. We are pleased to return a revised manuscript where we have followed all the advice given by the two reviewers. The responses to each query is listed in a separate PDF file entitled "Answer sheet to reviewers comments" attached as personal cover where you can see our responses describing the changes we have made to the manuscript. We greatly appreciate these comments and feel the manuscript has been improved in this review-process. We hope you will find the revised manuscript acceptable for publication in GigaScience and we are looking forward to hearing from you in due course. Please do not hesitate to contact me in case you need additional information.</p> <p>Sincerely yours<br/>Jinjie Duan (on behalf of all the authors)</p>                                                                                                                                                                                                                                                                                                                                                                                                                                                                                                                                                                                                                                                                                                                            |
| <b>Additional Information:</b>                                                       |                                                                                                                                                                                                                                                                                                                                                                                                                                                                                                                                                                                                                                                                                                                                                                                                                                                                                                                                                                                                                                                                                                                                                                                                                                                                                                                                                                                                                                                                                                                                                                                                                                                                                                                                                                                                                                                                                                                    |
| <b>Question</b>                                                                      | <b>Response</b>                                                                                                                                                                                                                                                                                                                                                                                                                                                                                                                                                                                                                                                                                                                                                                                                                                                                                                                                                                                                                                                                                                                                                                                                                                                                                                                                                                                                                                                                                                                                                                                                                                                                                                                                                                                                                                                                                                    |
| Are you submitting this manuscript to a special series or article collection?        | No                                                                                                                                                                                                                                                                                                                                                                                                                                                                                                                                                                                                                                                                                                                                                                                                                                                                                                                                                                                                                                                                                                                                                                                                                                                                                                                                                                                                                                                                                                                                                                                                                                                                                                                                                                                                                                                                                                                 |
| <b>Experimental design and statistics</b>                                            | Yes                                                                                                                                                                                                                                                                                                                                                                                                                                                                                                                                                                                                                                                                                                                                                                                                                                                                                                                                                                                                                                                                                                                                                                                                                                                                                                                                                                                                                                                                                                                                                                                                                                                                                                                                                                                                                                                                                                                |
| Full details of the experimental design and statistical methods used should be given |                                                                                                                                                                                                                                                                                                                                                                                                                                                                                                                                                                                                                                                                                                                                                                                                                                                                                                                                                                                                                                                                                                                                                                                                                                                                                                                                                                                                                                                                                                                                                                                                                                                                                                                                                                                                                                                                                                                    |

|                                                                                                                                                                                                                                                                                                                                                                                                                                                                                                                                                         |            |
|---------------------------------------------------------------------------------------------------------------------------------------------------------------------------------------------------------------------------------------------------------------------------------------------------------------------------------------------------------------------------------------------------------------------------------------------------------------------------------------------------------------------------------------------------------|------------|
| <p>in the Methods section, as detailed in our <a href="#">Minimum Standards Reporting Checklist</a>. Information essential to interpreting the data presented should be made available in the figure legends.</p> <p>Have you included all the information requested in your manuscript?</p>                                                                                                                                                                                                                                                            |            |
| <p><b>Resources</b></p> <p>A description of all resources used, including antibodies, cell lines, animals and software tools, with enough information to allow them to be uniquely identified, should be included in the Methods section. Authors are strongly encouraged to cite <a href="#">Research Resource Identifiers</a> (RRIDs) for antibodies, model organisms and tools, where possible.</p> <p>Have you included the information requested as detailed in our <a href="#">Minimum Standards Reporting Checklist</a>?</p>                     | <p>Yes</p> |
| <p><b>Availability of data and materials</b></p> <p>All datasets and code on which the conclusions of the paper rely must be either included in your submission or deposited in <a href="#">publicly available repositories</a> (where available and ethically appropriate), referencing such data using a unique identifier in the references and in the “Availability of Data and Materials” section of your manuscript.</p> <p>Have you have met the above requirement as detailed in our <a href="#">Minimum Standards Reporting Checklist</a>?</p> | <p>Yes</p> |

# Transcriptome Analysis of the Response of Burmese Python to Digestion

Jinjie Duan<sup>1</sup>, Kristian Wejse Sanggaard<sup>2,3</sup>, Leif Schauser<sup>5</sup>, Sanne Enok Lauridsen<sup>4</sup>, Jan J.  
Enghild<sup>2,3</sup>, Mikkel Heide Schierup<sup>1,4</sup> and Tobias Wang<sup>4</sup>

1. Bioinformatics Research Center, Aarhus University, Denmark

2. Department of Molecular Biology and Genetics, Aarhus University, Denmark

3. Interdisciplinary Nanoscience Center (iNANO), Aarhus University, Denmark

4. Department of Bioscience, Aarhus University, Denmark

5. QIAGEN Aarhus, Silkeborgvej 2, 8000 Aarhus C, Denmark

Corresponding authors: Jinjie Duan, Mikkel Heide Schierup & Tobias Wang

Email address:

Jinjie Duan: [jjduan@birc.au.dk](mailto:jjduan@birc.au.dk)

Kristian Wejse Sanggaard: [kristian@wejsesanggaard.dk](mailto:kristian@wejsesanggaard.dk)

Leif Schauser: [Leif.Schauser@qiagen.com](mailto:Leif.Schauser@qiagen.com)

Sanne Enok Lauridsen: [sanne.lauridsen@inano.au.dk](mailto:sanne.lauridsen@inano.au.dk)

Jan J. Enghild: [jje@mbg.au.dk](mailto:jje@mbg.au.dk)

Mikkel Heide Schierup: [mheide@birc.au.dk](mailto:mheide@birc.au.dk)

Tobias Wang: [tobias.wang@bios.au.dk](mailto:tobias.wang@bios.au.dk)

23 **Abstract**

24 Background:

25 ~~The~~ exceptional and extreme feeding behaviour makes the Burmese python a unique and  
26 interesting model to study physiological remodelling and metabolic adaptation in response to  
27 feeding after prolonged starvation. **With outset in specific hypotheses based on in vivo**  
28 **physiological responses**, we use transcriptome sequencing of five visceral organs and three  
29 digestive stages to unravel the patterns of changes in the gene expression of Burmese python  
30 upon ingestion of a large meal. We first used the combined data to perform a *de novo*  
31 assembly of the transcriptome. We supplemented with a proteomic survey of enzymes in the  
32 gastric juice, stomach secretome and plasma during digestion assisted by our transcriptome  
33 sequence database.

34 Results:

35 We constructed a high-quality transcriptome with 34,423 transcripts of which 19,713 (57%)  
36 were annotated. Among highly expressed genes (FPKM>100 in one tissue) we found  
37 **differential expression** for 43 genes in heart, 206 genes in liver, 114 genes in stomach, 89  
38 genes in pancreas and 158 genes in intestine. We interrogated the function of these genes in  
39 order to test previous **hypothesis** on the response to feeding. We also used the transcriptome  
40 to identify 314 secreted proteins in the python gastric juice.

41 Conclusions:

42 We provide comprehensive transcriptome data of multiple organs and various digestive **time**  
43 of Burmese python and address specific **hypothesis** on certain pathways known to related  
44 digestion process. We also identify, for the first time, stomach-related proteins from a



1  
2  
3  
4  
5  
6  
7  
8  
9  
10  
11  
12  
13  
14  
15  
16  
17  
18  
19  
20  
21  
22  
23  
24  
25  
26  
27  
28  
29  
30  
31  
32  
33  
34  
35  
36  
37  
38  
39  
40  
41  
42  
43  
44  
45  
46  
47  
48  
49  
50  
51  
52  
53  
54  
55  
56  
57  
58  
59  
60  
61  
62  
63  
64  
65

45 digesting individual and thereby demonstrate that the sensitivity of modern LC-MS/MS  
46 equipment allows the identification of gastric juice proteins that are present during digestion  
47 thereby providing novel insight into the digestion mechanism.

48 Keywords:

49 Burmese Python, transcriptome, tissue expression, digestion, pathway, proteome

## 50 **Background**

51 All animals exhibit dynamic changes in the size and functional capacities of bodily organs  
52 and tissues to match energetic maintenance costs to the prevailing physiological demands [1].

53 This phenotypic flexibility is particularly pronounced for the digestive organs in animals that  
54 naturally experience prolonged periods of fasting, **but capable** of ingesting large prey items at  
55 irregular intervals. The Burmese python is an iconic example of this extreme phenotype [1].

56 Many species of pythons easily endure months of fasting, but remain capable of subduing and  
57 ingesting very large meals. In Burmese pythons, digestion is attended by a large and rapid  
58 rise in mass and/or functional capacities of the intestine, stomach, liver, heart and kidneys [2-  
59 4] in combination with a stimulation of secretory processes and an activation of enzymes and  
60 transporter proteins. These physiological responses are associated with a many-fold rise in  
61 aerobic metabolism. Hence, the Burmese python is an excellent model to study the  
62 mechanisms underlying extreme metabolic transitions and physiological remodelling in  
63 response to altered demand [1, 3, 5-10].

64 The postprandial changes in the morphology and physiology of the intestine, heart and other  
65 organs have been described in some detail in pythons [1, 5, 8, 9, 11], but only a few studies  
66 [12-14] have addressed the underlying transcriptional changes of this interesting biological  
67 response. Transcriptome sequencing technology now allows comprehensive surveys [15, 16],  
68 and we therefore decided to use transcriptome sequencing of heart, liver, stomach, pancreas  
69 and intestine in snakes that had fasted for one month and at 24 and 48h into the postprandial  
70 period. These organs were chosen because a number of earlier studies reveal profound  
71 phenotypic changes during the postprandial period [1-4, 17], and are therefore likely to  
72 exhibit large changes in gene expression. Differential gene expression in some of these  
73 organs **have** previously been reported [12-14], but we provide new data on 48h into the

1  
2  
3  
4  
5  
6  
7  
8  
9  
10  
11  
12  
13  
14  
15  
16  
17  
18  
19  
20  
21  
22  
23  
24  
25  
26  
27  
28  
29  
30  
31  
32  
33  
34  
35  
36  
37  
38  
39  
40  
41  
42  
43  
44  
45  
46  
47  
48  
49  
50  
51  
52  
53  
54  
55  
56  
57  
58  
59  
60  
61  
62  
63  
64  
65

74 digestive period and the first descriptions of gene expression in the stomach and the pancreas.  
75 As the Burmese python reference genome assembly [12] ~~currently~~ is relatively fragmented  
76 (contig size N50 ~10kb), we found it impractical to use re-sequencing approaches and opted  
77 instead to use our high coverage data to build a *de novo* transcriptome assembly to identify  
78 differentially expressed genes (DEGs). To identify the enzymes involved in the digestion  
79 process, we initiated digestion, then isolated the digestive fluid and characterized the protein  
80 composition using a proteomics-based approach. This also allowed us to identify the major  
81 hydrolytic enzymes used to digest the large and un-masticated meals.

## 82 **Analyses**

### 83 Data summary

84 277,485,924 raw paired reads (2\*101 bp, insert size 180 bp) were obtained from Illumina Hi-  
85 Seq 2000 sequencing of 15 non-normalized cDNA libraries derived from five tissues (heart,  
86 liver, stomach, pancreas and intestine) at three time points (fasted for one month, 24h and 48h  
87 post-feeding) and 10 DSN-normalized cDNA libraries (see methods) (Supplementary Table  
88 S1). After removal of low-quality reads (See methods), 213,806,111 (77%), high-quality  
89 paired reads were retained. These reads contained a total 43,146,073,200 bp nucleotides with  
90 a mean Phred quality higher than 37 (Q37). To develop a comprehensive transcriptomics  
91 resource for the Burmese python (Fig. 1), we pooled these high-quality reads from 25  
92 libraries for subsequent *de novo* assembly.

### 93 *de novo* transcriptome assembly and evaluation

94 As short k-mers have a higher propensity to generate misassembled transcripts when using a  
95 de Bruijn graph-based *de novo* assembler, such as Velvet [18], we conservatively chose an  
96 assembly generated using long k-mers for subsequent analysis, at the cost of some sensitivity  
97 regarding assembled isoforms. Thus, balancing key metrics (Supplementary Table S2), we  
98 used an assembly based on the longest k-mer = 95 (Table 1), as it had the fewest  
99 scaffolds/transcripts (34,423), but represented a very large proportion (74%) of all reads. The  
100 scaffold N50 of this assembly was 1,673 bp.

101 To evaluate the accuracy of the transcriptome assembly, we compared it with the  
102 Burmese python reference genome (GenBank assembly accession: GCA\_000186305.2) and  
103 corresponding gene set in NCBI database using rnaQUAST v1.4.0 [19]. The transcriptome  
104 assembly had 34,423 transcripts in total. 34,040 (98%) of these transcripts had at least one

105 **significant** alignment to the reference genome, and 31,102 (91%) out of 34,040 were uniquely  
1  
2 106 aligned (Supplementary table S3). Average aligned fraction (i.e. total number of aligned  
3  
4 107 bases in the transcript divided by the total transcript length) was 0.975 (Supplementary table  
5  
6  
7 108 S3). The high concordance between the *de novo* transcript assembly and genome reference  
8  
9 109 strengthened our confidence in using *de novo* assembly as our reference, and shows that the  
10  
11 110 individual fragments were accurate although the reference genome assembly is fragmented.  
12  
13 111 By aligning assembled sequences back to reference genome, we checked the chimeric  
14  
15 112 assembled sequences which have discordant best-scored alignment (partial alignments that  
16  
17 113 are either mapped to different strands/different chromosomes/in reverse order/too far away)  
18  
19 114 and found 1,974 (5.7%) misassembled (chimeric) transcripts (Supplementary table S3) which  
20  
21 115 sequences **were stored in a supplementary FASTA file**. The comparison of assembled  
22  
23 116 sequences and reference gene sequences (Supplementary table S3) showed that 26,320  
24  
25 117 (77.3%) assembled transcripts cover at least one isoform from the reference gene set and the  
26  
27 118 mean fraction of transcript matched is 67.8%, suggesting there is a good concordance but also  
28  
29 119 some differences which can be due to errors in either the reference genome  
30  
31 120 assembly/annotation or our assembly. In addition, we assessed the completeness of our  
32  
33 121 transcriptome assembly with the Benchmarking Universal Single-Copy Orthologs (BUSCO)  
34  
35 122 strategy. Results showed 55.2% (1,428 out of 2,586) complete BUSCOs, 19.8% (512)  
36  
37 123 fragmented BUSCOs and 25% (646) missing BUSCOs. These results are consistent with the  
38  
39 124 survey [20] of assessment completeness of 28 transcriptomes from 18 vertebrates. In this  
40  
41 125 survey, most of transcriptomes from species with close phylogenetic relationship to **snake**  
42  
43 126 contain less than 50% complete BUSCOs and more than 40% missing BUSCOs. Therefore,  
44  
45 127 we conclude the quality of our transcriptome assembly was ~~well~~ acceptable.  
46  
47  
48  
49  
50  
51  
52  
53  
54  
55  
56

## 57 128 Transcriptome annotation

58  
59  
60 129 19,713 transcripts (57% of 34,423) were annotated using transfer of blastx hit annotation  
61  
62  
63  
64  
65

130 against the non-redundant (nr) NCBI peptide database [21]. To assign proper annotation for  
131 each transcript, we chose the first best hit that was not represented in uninformative  
132 descriptions (Supplementary Table S4). The most closely related species with an annotated  
133 genome, *Anolis carolinensis* was able to annotate 10,704 transcripts (54% of all annotated  
134 transcripts). Burmese Python and *Anolis carolinensis* both belong to the reptilian Squamata  
135 order, and are separated by approximately 120 million years of evolution [22].

136 Blast2GO [23] then annotated these 19,713 transcripts, and 16,992 of them could be  
137 assigned by one or more GO terms and putative functional roles were described. The  
138 distributions of the most frequently identified GO terms categories for biological process  
139 (BP), molecular function (MF) and cellular component (CC) are shown in Fig. S1. Moreover,  
140 we used the functionality of InterPro [24] annotations in Blast2GO to retrieve domain/motif  
141 information for our transcripts, and 21,023 transcripts were annotated by the InterPro  
142 database.

#### 143 Gene expression analysis and principal component analysis

144 For comparisons between genes, expression profiles were obtained by mapping high quality  
145 reads to the reference transcriptome and the expression level was given by fragments per kilo  
146 base per million sequenced reads (FPKM) [25]. For the study of expression profiles, we  
147 chose to investigate 1862 highly expressed genes (FPKM  $\geq$  100 in at least one tissue of 15),  
148 as it is known that for highly expressed genes, the biological variation among biological  
149 replicates in the same tissue at the same stage is lower than for genes showing low expression  
150 levels [26]. The majority (~64%) of these 1862 genes were expressed in all tissues, and only  
151 ~18% were expressed solely in one tissue (Supplementary Fig. S2). The liver had the highest  
152 number of uniquely expressed genes, which may reflect its particular role in metabolism and  
153 excretion of waste products.

154 We used principal component analysis (PCA) to reveal overall differences in gene  
1  
2 155 expression patterns among tissues and time points within the digestive period. The first three  
3  
4  
5 156 principal components (PCs) accounted for ~58% of the variation (Supplementary Fig. S3).  
6  
7 157 Despite the large overlap in expressed genes (Supplementary Fig. S2), the different tissues  
8  
9  
10 158 exhibited distinct transcriptional signatures shown by the PCA in Figure 2, showing a  
11  
12 159 tendency for 24h to represent an intermediate position between fasting and 48h. Liver,  
13  
14 160 intestine and stomach displayed greater shifts in the PCA plots compared to heart and  
15  
16  
17 161 pancreas, and the largest changes occurred between fasting and 24h in the stomach and  
18  
19 162 intestine. This fits well with the expectation that the stomach and intestine respond early in  
20  
21  
22 163 digestion [3]. The dramatic changes in gene expression in the liver are also consistent with  
23  
24 164 previous observations on pythons [12].

#### 28 165 Pattern of transcriptional responses to feeding

31  
32 166 The postprandial response involves thousands of genes and large changes in gene expression.  
33  
34 167 To restrict the analysis of these many genes, we used a conservative approach where we  
35  
36 168 selected genes that are both highly and differentially expressed with two strict thresholds (see  
37  
38  
39 169 methods). Application of these two thresholds yielded 43 genes for heart, 206 genes for liver,  
40  
41 170 114 genes for stomach, 89 genes for pancreas and 158 genes for intestine, respectively, that  
42  
43  
44 171 were differentially expressed in response to digestion (Fig. 3). To illustrate in greater detail,  
45  
46 172 we enlarged the five sub-clusters with the most prominent increase in expression. These sub-  
47  
48  
49 173 clusters, labelled a - e in Figure 3, are shown with full annotation in Figures 4-8. To unravel  
50  
51 174 the functional implications of these responses, we searched for genes encoding for proteins  
52  
53  
54 175 involved in processes of tissue re-organization, cellular metabolism and digestion within  
55  
56 176 these sub-clusters for each organ.

#### 60 177 GO enrichment analysis and colored KEGG pathway maps

178 To **get a** broader biological insight, compared to the strict threshold set used in the above  
1  
2 179 clustering analysis, we **applied a looser threshold set (Table 2)** of defining DEG and highly  
3  
4 180 expressed genes for functional annotation analysis. The summary of number of DEGs during  
5  
6 181 digestion in each tissue is illustrated in Table 3. In each organ, most ~~of~~ genes (> 76%) have  
7  
8  
9 182 low expression (max FPKM < 10). Around 1% of the genes are highly expressed (max  
10  
11  
12 183 FPKM >= 200). The number of upregulated genes is approximately 3% in each organ, except  
13  
14 184 for the heart where only 0.57% of the genes were upregulated in response to feeding. This  
15  
16 185 suggests that during digestion, the digestive organs, like liver, stomach, intestine and  
17  
18  
19 186 pancreas show more pronounced post feeding response than the heart. To dissect the  
20  
21  
22 187 functions of DEGs, we performed GO enrichment analysis with upregulated genes and highly  
23  
24 188 expressed genes respectively for each organ (Supplementary Figs. S4-S8). As an example,  
25  
26 189 the most significantly associated GO term to upregulated genes in stomach was  
27  
28  
29 190 “mitochondrial respiratory chain complex 1”, “endoplasmic reticulum membrane” and  
30  
31  
32 191 “cytosol” (Supplementary Fig. S4A).

33  
34  
35 192 To specifically identify the pathways associated to DEGs and highly expressed genes,  
36  
37  
38 193 we mapped genes to KEGG [27, 28] human pathway maps and colored the mapped entries  
39  
40 194 with trend of gene expression during digestion (Table 2). We identified upregulated genes  
41  
42  
43 195 and highly expressed genes, respectively, involved in three selected pathways  
44  
45 196 (glycolysis/gluconeogenesis, citrate cycle (TCA cycle), and oxidative phosphorylation) for  
46  
47  
48 197 each tissue (Supplementary table S5), and we performed the same identification for two main  
49  
50 198 pathway categories in the KEGG pathway database (1.3 lipid metabolism and 1.5 amino acid  
51  
52  
53 199 metabolism; Supplementary table S6). The glycolysis/gluconeogenesis pathway,  
54  
55 200 glyceraldehyde-3 phosphate dehydrogenase showed high expression in all organs.

56  
57  
58  
59 201 Identification of the python gastric juice proteome



202 We identified the secretome of the python stomach during digestion (Fig. 9). The resulting  
1  
2 203 mass spectrometry data (containing 122538 MS/MS spectra) was used to interrogate our  
3  
4 204 python transcriptome database, which includes transcriptome from stimulated stomach tissue.  
5  
6  
7 205 In total, 549 python proteins were identified using this approach. Afterwards, all  
8  
9 206 identifications based on a single tryptic peptide were removed reducing the number of  
10  
11  
12 207 identified python proteins to 314 (Supplementary Table S7).  
13  
14

15  
16 208 Five classical types of pepsinogens exist, namely pepsinogen A, B, and F,  
17  
18 209 progastricsin (or pepsinogen C), and prochymosin [29]. Of these, our analyses  
19  
20  
21 210 (Supplementary table S8 and S9) show that pythons primarily rely on progastricsin for  
22  
23 211 proteolytic digestion, as the five most abundant proteases identified in the gastric juice are  
24  
25 212 annotated as progastricsin-like. Alignment of the sequences of the various transcripts for  
26  
27 213 gastricsin-like proteins shows considerable differences in sequence, which indicate the  
28  
29  
30 214 presence of numerous different proteins with similar functions. This annotation is based on  
31  
32  
33 215 accession XP\_003220378.1 and XP\_003220378.1 from *Anolis carolinensis*. Alignment of the  
34  
35 216 python sequences with the two anole sequences, as well as with the well-characterized human  
36  
37  
38 217 gastricsin variant, shows that both the active site residues, as well as cysteine bridges, are  
39  
40 218 conserved. It demonstrates the similarity between these enzymes and suggests that the  
41  
42  
43 219 identified python sequences indeed represent catalytically active proteolytic enzymes  
44  
45 220 (Supplementary Fig. S9). The last identified pepsinogen-like python sequence  
46  
47 221 (m.31615\_Py95) was annotated based on the predicted embryonic pepsinogen-like sequence  
48  
49  
50 222 (XP\_003220239.1), also from *Anolis carolinensis*. Here, the annotation originates from an  
51  
52 223 embryonic pepsinogen identified in chicken [30]. This protease was identified in the python's  
53  
54  
55 224 gastric juice with a lower emPAI value than the gastricsin sequences indicating a lower  
56  
57 225 concentration of this enzyme (Supplementary table S8), although the transcript displays the  
58  
59 226 highest concentration of the analysed pepsinogens in the post-prandial period (Supplementary  
60  
61  
62  
63  
64  
65

227 table S9). As the name **indicate** it is exclusively expressed during the embryonic period [30,  
1 228 31], and **phylogenic** analysis of the sequence suggest that its closest homolog, among the  
2 3 4 229 classical pepsinogens, is prochymosin [30]. Also, prochymosin displays a temporal  
5 6 7 230 expression pattern and is, in mammals, mainly expressed in new-born species. However, the  
8 9 10 231 identified python snake embryonic chicken pepsinogen homolog does not display a similar  
11 12 232 development-related temporal expression pattern and is, as shown, used among adult species  
13 14 233 for digestion. However, it does not exclude that the protease is expressed during the python's  
15 16 17 234 embryonic phase.

## 21 235 Identification of prey proteins and the python plasma proteome

24 236 Many of the obtained MS/MS spectra were expected to correspond to abundant mice  
25 26 27 237 proteins, such as collagen. To facilitate the downstream analyses of the python proteins, we  
28 29 238 produced a list of background proteins related to the prey. Hence, interrogation of the mass  
30 31 32 239 spectrometry data against the 16693 mouse protein sequences in the Swiss-Prot database  
33 34 240 resulted in the identification of 212 mouse proteins, after removing hits based on single  
35 36 241 peptides (Supplementary table S10). To produce a list of identified python proteins, most  
37 38 39 242 likely present in the digestive fluid samples due to blood contaminations during collection,  
40 41 243 we characterized the python plasma proteome. The most abundant plasma proteins are  
42 43 44 244 produced by the liver. Consequently, our python transcriptome sequence database, which  
45 46 245 encompasses liver transcriptomes, is expected to contain the protein sequences of the python  
47 48 49 246 plasma proteins. Thus, our python plasma LC-MS/MS data was used to interrogate our  
50 51 247 python sequence database. It provided an overview of the most abundant python plasma  
52 53 248 proteins (Supplementary table S11). In total, 64 plasma proteins were identified with  
54 55 56 249 minimum two tryptic peptides. The result supports the liver transcriptome data, since the  
57 58 250 abundant (based on emPAI) plasma proteins **correlate** with the transcripts that are detected at

251 high concentration in the liver tissue. The overall protein composition is similar to the  
252 composition in humans with albumin, fibrinogen, alpha-2-macroglobulin, immunoglobulins,  
253 complement factors and apolipoproteins being the dominating proteins. One protein that  
254 stands out is the anti-haemorrhagic factor cHLP-B (m.27\_Py95), which appeared in high  
255 concentration in the plasma of these snakes. This is a protease inhibitor of the haemorrhagic-  
256 causing metalloproteinases present in snake venom and these inhibitors have previously been  
257 purified from serum of venomous snakes and thoroughly characterized [32, 33]. The role of  
258 such a protease inhibitor in non-venomous pythons is not obvious, but it has been proposed  
259 that they inhibit the deleterious action of venom enzymes in non-venomous snakes [34].

#### 260 Identification of the python stomach secretome

261 To identify the python stomach secretome, the list of python proteins, identified in the  
262 digestive fluid (Supplementary table S7) was analysed further. We assumed no overlap  
263 between abundant plasma proteins and proteins secreted by the stomach. Thus, plasma  
264 proteins, identified in the gastric juice, were assumed to be contaminations from blood and  
265 therefore the 64 identified plasma proteins were, when present, removed from the list.  
266 Subsequently, python proteins that most likely were identified based on prey proteins  
267 homology (*e.g.* python collagens and keratins, as well as conserved intracellular household  
268 proteins) were removed. These two steps reduced the list of proteins identified in the stomach  
269 samples from 314 to 114 proteins (Supplementary table S12). It cannot be excluded that a  
270 few proteins belonging to the python stomach secretome also were removed.

271 To identify the secretome, the 114 identified proteins were manually analysed as  
272 described in the method section (Supplementary table S12). In addition to household proteins,  
273 the identified intracellular proteins also included intracellular stomach-specific proteins (*e.g.*  
274 the stomach specific calpain 9 cysteine protease [35]), underlining the specificity of the

1  
2  
3  
4  
5  
6  
7  
8  
9  
10  
11  
12  
13  
14  
15  
16  
17  
18  
19  
20  
21  
22  
23  
24  
25  
26  
27  
28  
29  
30  
31  
32  
33  
34  
35  
36  
37  
38  
39  
40  
41  
42  
43  
44  
45  
46  
47  
48  
49  
50  
51  
52  
53  
54  
55  
56  
57  
58  
59  
60  
61  
62  
63  
64  
65

275 proteomics analysis. In total, 37 proteins constituted the putative python stomach secretome  
276 (Supplementary table S8). These could be divided into 18 gastric mucosal-related proteins  
277 (e.g. mucin homologous and gastrokine), seven proteolytic enzymes (mainly pepsin  
278 homologous), four other hydrolytic enzymes (e.g. phospholipases), and eight other proteins  
279 (e.g. gastric intrinsic factor) (Supplementary table S8). Previous gastric juice proteomics  
280 analyses were performed on samples obtained from fasting humans, most likely to avoid the  
281 complex prey-protein background. In our study, we identify, for the first time, stomach-  
282 related proteins from a digesting individual and thereby demonstrate that the sensitivity of  
283 modern LC-MS/MS equipment allows the identification of gastric juice proteins that are  
284 present during digestion.

## 285 Discussion

1  
2  
3  
4 286 A primary motivation for our description of the temporal changes in gene expression profiles  
5  
6 287 as the visceral organs of Burmese pythons made the transition from fasting to digestion was  
7  
8 288 to identify key regulatory genes and pathways responsible for the pronounced tissue  
9  
10 289 restructuring and the increased functional capacity during the postprandial period. An equally  
11  
12  
13 290 important motivation was to address specific hypothesis on the upregulation of certain  
14  
15 291 pathways known to be involved in the secretion of digestive juices and enzymes as well as  
16  
17  
18 292 the absorption of the nutrients as digestion proceed. We achieved these goals by identifying  
19  
20  
21 293 the biochemical and physiological roles of the highly expressed genes with increased  
22  
23 294 expression during digestion and by using KEGG analysis of specific pathways underlying  
24  
25 295 physiological responses known to be stimulated by digestion. We also present GO  
26  
27  
28 296 enrichment analyses of both up-regulated genes and highly expressed genes in all organs  
29  
30 297 (Supplementary Figs. S4-S8), showing that “biological process” is the most common  
31  
32  
33 298 enriched category.

34  
35  
36 299 The influence of digestion on gene expression profiles in heart, liver, kidney and small  
37  
38  
39 300 intestine has been studied previously in pythons [12-14]. These earlier studies reported  
40  
41 301 thousands of genes being either up- or downregulated within the first day of digestion [12-  
42  
43  
44 302 14], and we confirm these substantial changes in gene expression at 24h and 48h. However,  
45  
46 303 we merely identified hundreds of genes, probably because we selected a more stringent  
47  
48  
49 304 threshold for calling the differential expression. Given the differences in the selection of  
50  
51 305 thresholds and analysis strategy for differential expression and differences in times of  
52  
53  
54 306 sampling, it is difficult to make a direct comparison between our study and that of Castoe et  
55  
56 307 al (2013). Nevertheless, for heart, liver and small intestine, both studies have determined a  
57  
58 308 number of upregulated genes at 24h where we identified 15, 93 and 61 upregulated genes,  
59  
60  
61  
62  
63  
64  
65

309 respectively. Comparing upregulated genes between two studies (see supplementary material  
1  
2 310 for detailed method and result), we found there was **good overlap** in identifying upregulated  
3  
4 311 genes in the liver where more than half of the 93 genes identified in our study were identified  
5  
6  
7 312 as upregulated genes by Castoe et al (2013). However, there was less overlap for heart and  
8  
9  
10 313 the small intestine. These differences may be due to the use of different quantification  
11  
12 314 methods for gene expression in the various studies, but may also be a result of the limited  
13  
14 315 biological replicates in our study. **Nevertheless, genes identified as being upregulated in both**  
15  
16  
17 **316 studies, are probably of high confidence.**

18  
19  
20 317 Physiological interpretation of the upregulated genes in the stomach

21  
22  
23  
24 318 The considerable changes in gene expression in the stomach were reflected in a pronounced  
25  
26  
27 319 rise in expression of ribosomal 40S and 60S proteins (Fig. 4) that is likely to have attended a  
28  
29 320 rise in protein synthesis required for the marked transition from a quiescent fasting state to  
30  
31 321 the activated digestive state. This is also supported by the presence of ribosomal functions in  
32  
33  
34 322 the enriched GO analysis of the stomach of the highly-expressed genes (Supplementary Fig.  
35  
36 323 S4B). During fasting, gastric acid secretion and presumably also the secretion of digestive  
37  
38  
39 324 enzymes and lysozymes, is halted, such that the gastric juice has a neutral pH, whilst  
40  
41 325 ingestion of prey is followed by an immediate activation of gastric acid secretion [36, 37].  
42  
43  
44 326 The stimulation of the secretory actions of the stomach is attended by an increased mass of  
45  
46 327 the stomach, where particularly the mucosa expands already within the first 24h [38].  
47  
48

49  
50 328 The KEGG analysis, however, shows that the genes encoding for the gastric H,K  
51  
52 329 ATPase, the active and ATP consuming ion-transporter responsible for gastric acid secretion,  
53  
54  
55 330 are highly expressed in fasting animals, and not additionally elevated in the postprandial  
56  
57 331 period (Fig. 10). This strongly indicates that the enzymatic machinery for gastric acid  
58  
59  
60 332 secretion is maintained during fasting, a trait that may enable fast activation of acid secretion,  
61  
62  
63  
64  
65

333 at modest energetic expenditure, to kill bacteria and match gastric pH to the optimum value  
1  
2 334 for pepsin. This interpretation is consistent with a number of recent studies indicating a rather  
3  
4  
5 335 modest contribution of gastric acid secretion to the specific dynamic action (SDA) response  
6  
7 336 in pythons [39, 40], but we also did observe a high prevalence of ATP synthase subunits (Fig.  
8  
9  
10 337 4) amongst the highly upregulated genes, which does indicate a rise in aerobic metabolism  
11  
12 338 (see also supplementary Fig. S4). Furthermore, the upregulation of the gene encoding for  
13  
14 339 creatine kinase (Fig. 4) indicate increased capacity for aerobic respiration required costs of  
15  
16 340 acid secretion and the stimulation of the accompanying gastric functions. It has been  
17  
18  
19 341 proposed that gastric processes account for more than half of the rise in total metabolism  
20  
21 342 during digestion [36], and aerobic metabolism of isolated gastric strips *in vitro* increased  
22  
23 343 during digestion [41]. However, while metabolism of the stomach certainly must increase  
24  
25  
26 344 during the postprandial period, more recent studies indicate a considerably smaller  
27  
28  
29 345 contribution of gastric acid secretion to the total SDA response **is considerable** lower than  
30  
31 346 50% [39, 40, 42].  
32  
33  
34

35 347 Our KEGG analysis also showed a large rise in expression of the gene encoding for  
36  
37 348 carbonic anhydrase (Fig. 10), the enzyme that hydrates CO<sub>2</sub> and provide protons for gastric  
38  
39 349 acid secretion. Gastric acid secretion, therefore, does not appear **to under transcriptional**  
40  
41  
42 350 regulation, but is likely to involve translocation of existing H,K ATPases in vesicles from  
43  
44 351 intracellular vacuoles to the apical membrane of the oxyntopeptic cells that are responsible  
45  
46 352 for both gastric acid secreting as well as the release of pepsinogen in reptiles [43]. An  
47  
48  
49 353 activation of the processes involved in vesicle transport is further supported by increased  
50  
51 354 transcription of the gene encoding for CD63 (Fig. 4), which belongs to the tetraspanin family  
52  
53  
54 355 and mediate signal transduction events.  
55  
56  
57

58 356 In contrast to acid secretion, expression of several genes encoding for digestive  
59  
60  
61  
62  
63  
64  
65

357 enzymes (embryonic pepsinogen-like, gastricsin precursor and gastricsin-like) (Fig. 4) were  
1  
2 358 upregulated, which is consistent with *de novo* synthesis of the enzymes responsible gastric  
3  
4  
5 359 protein degradation. Also, there was good overlap between the upregulation of the relevant  
6  
7 360 genes encoding for the proteins identified in the stomach secretome, such as gastrokines,  
8  
9  
10 361 pepsin homologous, phospholipases and gastric intrinsic factor (Supplementary table S8). In  
11  
12 362 this context, it is also interesting that mucin 6 (Fig. 4), the gene coding for the large  
13  
14  
15 363 glycoprotein (gastric mucin) that protects the gastric mucosa from the acidic and  
16  
17 364 proteolytically active chyme in the stomach lumen was upregulated. Thus, as gastric acid  
18  
19 365 secretion is activated, probably in response to increased levels of the gastrin as well as  
20  
21  
22 366 luminal factors, there is an accompanying activation of the protective mucus layer that  
23  
24 367 prevents auto-digestion of the gastric mucosa. It is also noteworthy that the genes for both  
25  
26  
27 368 gastrokine 1 and 2 were upregulated during digestion (Fig. 4). Gastrokines are constitutively  
28  
29 369 produced proteins in the gastric mucosa in mammals and chickens, and while the  
30  
31  
32 370 physiological function remains somewhat elusive, they appear to upregulated during mucosal  
33  
34 371 remodelling in response to inflammation (*e.g.* in connection with ulcers) and often  
35  
36  
37 372 downregulated in cancers. Thus, it is likely that the gastrokines are involved in regulating the  
38  
39 373 restructuring of the mucosa during digestion in pythons.

42 374 In addition to analysing the gene expression profiles of the stomach, we also used a  
43  
44  
45 375 proteomics approach, assisted by our python transcriptome sequence database, to identify the  
46  
47  
48 376 hydrolytic enzymes in the gastric juice secreted during digestion. We identified python  
49  
50 377 proteins on a complex background of highly abundant mice proteins. Python's digested food  
51  
52 378 is, when it enters the duodenum, **overall similar** to digested food in **e.g.** humans. Thus, the  
53  
54  
55 379 digestive enzymes secreted by the pancreas are probably functional similar to known  
56  
57 380 hydrolytic enzymes from other species. Consequently, the enzymes that facilitate the extreme  
58  
59  
60 381 digestion process and **allow for** have to be present in the stomach's digestive fluid.



382 We hypothesized that relative aggressive proteolytic digestive enzymes in the gastric  
1  
2 383 juice facilitate digestion of large and un-masticated whole prey items [8]. In our analysis, six  
3  
4  
5 384 out of the seven identified proteolytic enzymes were pepsinogens homologous (Peptidase  
6  
7 385 subfamily A1A), and these were also the most abundant hydrolytic enzymes in the gastric  
8  
9  
10 386 juice according to the emPAI values (Supplementary table S8). Most likely other pepsinogen  
11  
12 387 isoforms exist in the gastric juice, as our approach predominantly **target** the most abundant  
13  
14 388 proteolytic enzymes. The importance of the proteomics-identified pepsinogens was also  
15  
16  
17 389 substantiated by the transcriptomics data (Supplementary table S9). Here, we found that the  
18  
19 390 six different pepsinogens were upregulated between 2.2 and 22.2 fold from the fasting  
20  
21  
22 391 animals to 48 hours after ingestion of mice. In average the pepsinogen transcripts were  
23  
24 392 upregulated 10.7 fold. It supports that these proteases play a substantial role in the aggressive  
25  
26  
27 393 digestion process performed by the python.

28  
29  
30 394 Our proteomic analysis also suggested the identification of the pepsinogens as the  
31  
32  
33 395 major digestive proteolytic enzymes is similar to all other vertebrate species. Thus, our  
34  
35 396 results indicate that it is not unique (with respect to protease class) and hitherto  
36  
37  
38 397 uncharacterized proteases that facilitate the aggressive digestion process. Instead, pepsins,  
39  
40 398 homologous to pepsins among other species, digest the intact swallowed prey. The general  
41  
42  
43 399 condition in the stomach during digestion (e.g. pH) is also **similar to other species**. Thus, it is  
44  
45 400 likely that these pepsins variants are among the most effective and aggressive pepsins  
46  
47  
48 401 identified so far and the provided sequence information facilitate future cloning, expression,  
49  
50 402 and characterization of these potential industrial relevant enzymes.

51  
52  
53 403 Physiological interpretation of the upregulated genes in the intestine

54  
55  
56  
57 404 The small intestine of pythons undergoes a remarkable and fast expansion during digestion  
58  
59  
60 405 where both wet and dry mass more than doubles within the first 24 hours. The expansion

406 stems primarily from increased mucosal mass, achieved by swelling of the individual  
1  
2 407 enterocytes [44], while the smooth muscle in the gut wall is much less responsive [45].  
3  
4  
5 408 Earlier studies on gene expression profiles during digestion in the python intestine revealed  
6  
7 409 massive upregulation of more than one thousand genes, commencing within the first six  
8  
9  
10 410 hours after ingestion [12, 13]. Importantly, this previous study [13] identified a number of  
11  
12 411 genes that are likely to be involved in the restructuring of the microvilli, cell division and  
13  
14 412 apoptosis, as well as brush-border transporter proteins. In line with these earlier findings, our  
15  
16  
17 413 GO enrichment analysis also highlights functions pertaining to mitotic cell division, which  
18  
19 414 supports a contribution to growth by hyperplasia faster cell turnover (Supplementary Fig. S5).  
20  
21  
22 415 The expansion of the individual enterocytes is accompanied by pronounced elongation of the  
23  
24 416 microvilli [46] and the resulting rise in surface area of the intestinal lining is accompanied by  
25  
26  
27 417 an ten-fold increase in intestinal transport capacity for amino acids and other nutrients [1, 4,  
28  
29 418 47].  
30  
31  
32  
33 419 Earlier studies provided strong evidence for an upregulation of genes coding for nutrient  
34  
35 420 transporter proteins, such as D-glucose, L-proline and L-leucine [13]. In this context, it is  
36  
37  
38 421 noteworthy that there were no nutrient transporters amongst the highly expressed and  
39  
40 422 upregulated genes in the intestine (Fig. 5), but our KEGG analysis nevertheless showed  
41  
42 423 increased expression of the serosal L-type amino acid transporter. Clearly, it would be  
43  
44  
45 424 worthwhile to quantitatively analyse the extent to which *de novo* synthesis of the various  
46  
47 425 nutrient transporters, particularly those for amino acids, is increased during digestion and  
48  
49  
50 426 how much such synthesis **contribute** to absorptive capacity. It would seem adaptive if many  
51  
52 427 of the transporters merely have to be activated, either by insertion within the luminal  
53  
54  
55 428 membrane or exposed as the enterocytes expand, to allow for an energetically cheap manner  
56  
57 429 of matching intestinal performance to the sudden appearance of nutrients in the intestine after  
58  
59  
60 430 a meal. The GO enrichment analysis also pointed to an enrichment of various metabolic  
61  
62  
63  
64  
65

431 processes during digestion, particularly for the upregulated genes (Supplementary Fig. S5). It  
432 is noteworthy that the expression of genes for glutathione S-transferase, peroxiredoxin and  
433 selenoprotein increased during digestion (Fig. 5). These three proteins are involved in cellular  
434 defence, particularly as antioxidants as a likely protection of reactive oxygen species  
435 resulting from increased aerobic metabolism.

436 There is consensus that the anatomical and structural responses underlying this  
437 phenotypic flexibility of intestinal function occur at modest energetic expenditure [17, 36,  
438 48], but our expression profile does show increased expression of the gene coding for  
439 Cytochrome P450 pointing to increased aerobic and mitochondrial metabolism. An increased  
440 expression of genes involved in oxidative phosphorylation was also reported in earlier studies  
441 on pythons [12, 13]. This rise in metabolism may be driven primarily by the massive rise in  
442 secondary active transport to absorb the amino acids and smaller peptides rather than the  
443 structural changes [48]. Nevertheless, the structural changes may be reflected in increased  
444 expression of galectin 1 (Fig. 5), which mediate numerous function including cell–cell  
445 interactions, cell–matrix adhesion and transmembrane signalling.

446 Fig. 5 reveals the importance of lipid absorption and the subsequent transport by the  
447 cardiovascular and lymph systems, and it is also possible that several of the expressed  
448 proteins play a role in the incorporation of lipid droplets within the enterocytes. Thus, the  
449 presence of numerous apolipoproteins, and their precursor apoe protein, amongst the list of  
450 highly expressed and highly expressed genes (Fig. 5) are probably needed to transport the  
451 absorbed lipids in plasma and lymph, but the apolipoproteins could also act enzyme  
452 cofactors, receptor ligands, and lipid transfer carriers in the regulation of lipoprotein  
453 metabolism and cellular uptake. Diazepam-binding inhibitor (Fig. 5), a protein involved in  
454 lipid metabolism and under hormonal regulation mostly within nervous tissue, is also likely

1 455 to reflect the increased lipid absorption and metabolism in the postprandial period, and there  
2 456 was also a rise phospholipases (Fig. 5) that are likely to be involved in lipid degradation.  
3  
4 457 Also, the capacity for protein metabolism clearly increased in the intestine during digestion  
5  
6  
7 458 (meprin A and endopeptidase that cleaves peptides, as well as 4-aminobutyrate  
8  
9 459 aminotransferase, 4-trimethylaminobutyraldehyde dehydrogenase and diamine  
10  
11  
12 460 acetyltransferase) and there was a rise in the ammonium transporter protein Rh (Fig. 5).  
13  
14 461 Finally, a number of proteins involved in calcium uptake and metabolism, such as calbindin  
15  
16  
17 462 and calmodulin (Fig. 5), could be important to handle the break-down of the bone in a normal  
18  
19 463 rodent, and it was recently shown the enterocytes of pythons contain small particles of bone  
20  
21  
22 464 already 24 hours after ingestion [46].  
23  
24

25 465 Physiological interpretation of the upregulated genes in the heart  
26  
27

28  
29 466 The large metabolic response to digestion is tailored by a doubling of heart rate and stroke of  
30  
31  
32 467 the heart such that cardiac output remains elevated for many days during digestion [49, 50].  
33  
34 468 This cardiovascular response plays a pivotal role in securing adequate oxygen delivery to the  
35  
36 469 various organs and serves to ensure an appropriate convective transport of the nutrients taken  
37  
38  
39 470 up by the intestine. The tachycardia is mediated by a release of vagal tone and the presence of  
40  
41 471 a non-adrenergic-non-cholinergic stimulation of the heart, which has been speculated to be  
42  
43  
44 472 released from the gastrointestinal organs during digestion [51, 52]. The increased heart rate,  
45  
46 473 and the rise in the amount of blood pumped with each beat, must be supported by increased  
47  
48  
49 474 metabolism of the myocardium and we observed an upregulation of malate dehydrogenase,  
50  
51 475 cytochromes and ATPase linked enzymes (Fig. 6) that are likely to be related to an increased  
52  
53  
54 476 oxidative phosphorylation within the individual myocytes (see also the prevalence of  
55  
56 477 enriched GO terms associated with aerobic metabolism in Supplementary Fig. S8). Previous  
57  
58 478 gene expression studies on the python heart also yielded evidence for increased oxidative  
59  
60  
61  
62  
63  
64  
65

479 capacity in postprandial period [53] and cytochrome oxidase activity is almost doubled  
1  
2 480 during digestion [54], and we confirm that transcription for heat shock proteins may be  
3  
4  
5 481 increased [53], possibly to protect against oxidative damage as result of the increased  
6  
7 482 metabolism. As in earlier studies [53], our observation of increased ATP synthase  
8  
9  
10 483 lipid-binding protein and fatty acid binding protein 3 (Fig. 6) provide evidence for increased  
11  
12 484 fatty acid metabolism, which may reflect the substantial rise in circulating fatty acids in the  
13  
14 485 plasma.

16  
17  
18 486           It was originally suggested that the postprandial rise in stroke volume could be  
19  
20  
21 487 ascribed to an impressive and swift growth of the heart [10], possibly triggered lipid-  
22  
23 488 signalling [53]. However, a number of recent studies, primarily from our laboratory, have  
24  
25 489 shown that increased cardiac mass is not an obligatory postprandial response amongst  
26  
27  
28 490 pythons [54-56], and that stroke volume may be increased in response to increased venous  
29  
30 491 return rather than cardiac hypertrophy [54]. It is nevertheless, noteworthy that our and the  
31  
32  
33 492 previous studies show a clear increase in the expression of contractile proteins (e.g. myosin  
34  
35 493 and actin) as well as tubulin (Fig. 6), which may reflect increased protein-turnover in  
36  
37  
38 494 response to increased myocardial workload rather than cell proliferation or hypertrophy. The  
39  
40 495 enriched GO analyses also point to major changes in the extracellular space as well as both  
41  
42 496 elastin and collagen, which may indicate some level of cardiac reorganization at the cellular  
43  
44  
45 497 or subcellular level that may alter compliance of the myocardial wall and influence cardiac  
46  
47 498 filling (Supplementary Fig. S8). It is noteworthy that the increased expression of BNP may  
48  
49  
50 499 serve a signalling function as described in response to the cardiac hypertrophy that attends  
51  
52 500 hypertension.

#### 56 501 Physiological interpretation of the genes in the liver

57  
58  
59  
60 502 The liver exhibited a diverse expression profile in response to digestion that is likely to

503 reflect its many metabolic functions in connection with metabolism, synthesis and  
1  
2 504 detoxification during the postprandial period. This pattern is also evident from the many  
3  
4 505 metabolic functions identified in the enriched GO analysis (Supplementary Fig. S7). There  
5  
6  
7 506 were marked upregulations of the P450 system (Fig. 7), which stems well with a rise in  
8  
9  
10 507 synthesis and breakdown of hormones and signalling molecules, cholesterol synthesis in  
11  
12 508 response to lipid absorption and possibly also an increased metabolism of potentially toxic  
13  
14 509 compounds in the prey. A rise in cholesterol metabolism was supported by increased  
15  
16  
17 510 expression apolipoproteins (Fig. 7). The hepatic involvement in lipid metabolism was also  
18  
19 511 supported by the increased expression of genes for Alpha-2-macroglobulin and serum  
20  
21 512 albumin (Fig. 7). The increased expression of albumin obviously also fits nicely with the  
22  
23  
24 513 proteomic analysis of plasma proteins and it is likely that the postprandial rise in plasma  
25  
26  
27 514 albumin serves a functional role in the lipid transport between the intestine and the liver as  
28  
29 515 well as other metabolically active organs  
30  
31

32  
33 516 It is also noteworthy that a number of genes associated with the protection of  
34  
35 517 oxidative stress, such as catalase, heat shock protein and glutathionine transferase were  
36  
37  
38 518 markedly upregulated (Fig. 7). It was recently argued that snakes digesting large meals  
39  
40 519 experience oxidative damage due to reactive oxygen metabolites requiring increased  
41  
42  
43 520 antioxidant responses to protect cellular functions [57].  
44  
45

46 521 Physiological interpretation of the genes in the pancreas  
47  
48  
49

50 522 We sampled the entire pancreas for our analysis of gene expression and our data therefore  
51  
52 523 reflect both endocrine and exocrine pancreatic functions. **The vast majority** of the upregulated  
53  
54 524 genes concerned the exocrine pancreas, and we found ample evidence for upregulated  
55  
56  
57 525 expression of genes associated with the digestive functions, such as lipases, trypsin,  
58  
59  
60 526 chymotrypsin and elastase and other enzymes for digestion of protein and lipid (Fig. 8). This  
61  
62  
63  
64  
65

527 general upregulation of secretory processes is likely to explain the prevalence of processes  
1  
2 528 associated with protein synthesis in the enriched GO analysis (Supplementary Fig. S6). There  
3  
4  
5 529 was even an increased expression of amylase (Fig. 8) that breaks down polysaccharides. In  
6  
7 530 connection with this latter function, the increased expression of insulin (Fig. 8) from the  
8  
9  
10 531 endocrine pancreas is likely to reflect increased cellular signalling for postprandial uptake of  
11  
12 532 both glucose and amino acids. As in the other organs, we found increased expression of  
13  
14  
15 533 cytochrome oxidase (Fig. 8) indicative of increased metabolism during digestion, and the rise  
16  
17 534 in heat shock protein expression may reflect a response to formation of reactive oxygen-  
18  
19 535 species as metabolism is stimulated by increased secretion of the pancreas.  
20  
21  
22  
23  
24  
25  
26  
27  
28  
29  
30  
31  
32  
33  
34  
35  
36  
37  
38  
39  
40  
41  
42  
43  
44  
45  
46  
47  
48  
49  
50  
51  
52  
53  
54  
55  
56  
57  
58  
59  
60  
61  
62  
63  
64  
65

536 **Conclusions**

1  
2  
3  
4 537 Our study confirms that the extensive physiological and anatomical reorganization of the  
5  
6 538 visceral organs of pythons during the postprandial period is driven by differential expression  
7  
8 539 of hundreds or even thousands of genes. Many of the upregulated functions pertain to energy  
9  
10  
11 540 production to support the rise in aerobic metabolism associated with digestion and absorption  
12  
13 541 of the large meals. In terms of the gastrointestinal organs, the gene expression profiles also  
14  
15  
16 542 support the view that many of the digestive functions, such as gastric acid secretion and  
17  
18 543 nutrient absorption, can be stimulated with little gene expression indicating that the proteins  
19  
20  
21 544 involved in these processes are merely need to be activated during the postprandial period,  
22  
23 545 and thus avoiding the energy and time-consuming processes associated with *de novo*  
24  
25 546 synthesis. This digestive strategy may, at least in part, explain how intermittent feeders, such  
26  
27  
28 547 as snakes, retain the capacity for fast and reliable upregulation of the digestive processes  
29  
30 548 immediately after ingestion.  
31  
32  
33  
34  
35  
36  
37  
38  
39  
40  
41  
42  
43  
44  
45  
46  
47  
48  
49  
50  
51  
52  
53  
54  
55  
56  
57  
58  
59  
60  
61  
62  
63  
64  
65



549 **Methods**

1  
2  
3  
4 550 Stimulation of the postprandial response, collection of tissue biopsies and purification of  
5  
6 551 RNA for mRNA-seq analyses  
7  
8

9  
10 552 Six *Python molurus* (Tiger Python/Burmese Python) with a body mass ranging from 180 to  
11  
12 553 700 g (average 373 g) were obtained from a commercial supplier and housed in vivaria with a  
13  
14 554 heating system providing temperatures of 25-32 °C. The animals were fed rodents once a  
15  
16  
17 555 week and fresh water was always available. The animals appeared healthy and all  
18  
19 556 experiments were performed according to Danish Federal Regulations. All six individuals  
20  
21  
22 557 were fasted for one month and divided in three groups. Four animals were fed a rodent meal  
23  
24 558 of 25 % of body weight and euthanized with an intra-peritoneal injection of pentobarbital (50  
25  
26 559 mg kg<sup>-1</sup>; Mebumal) at 24h (N = 2) or 48h after feeding (N = 2). The remaining two snakes  
27  
28  
29 560 served as fasted controls. During deep anaesthesia, two biopsies were obtained from each  
30  
31 561 snake from each of the following tissues: The heart (ventricles), liver, stomach, intestine, and  
32  
33  
34 562 pancreas. In regard to the stomach tissue samples, one sample was obtained from the  
35  
36 563 proximal part of the stomach and one sample was obtained from the distal part. In total, 60  
37  
38  
39 564 biopsies were collected. The samples were taken from the same part of the different tissues in  
40  
41 565 all individuals. After sampling, the biopsies were weighted and immediately snap frozen in  
42  
43 566 liquid nitrogen; stomach and intestinal tissues were rinsed in sterile saline solution before  
44  
45  
46 567 weighting to avoid contamination with rodent tissue from the ingested meal. Subsequently,  
47  
48  
49 568 all 60 biopsies were homogenized in liquid nitrogen and the four biological replicates (two  
50  
51 569 biopsies from each individual) were pooled in a 1:1 manner based on mass. It resulted in 15  
52  
53 570 samples (five tissues X three time points). From these samples, total RNA was purified using  
54  
55  
56 571 the Nucleospin RNA II kit (Machery-Nagel GmbH & Co.), as recommended by the  
57  
58 572 manufacturer. The RNA concentration and quality were assessed by Nanodrop ND 1000  
59  
60  
61  
62  
63  
64  
65

573 Spectrophotometer (Thermo Scientific) analyses, agarose gel-electrophoreses, and Agilent  
1  
2 574 BioAnalyzer (Agilent) analyses.  
3  
4  
5  
6 575 Library production and sequencing  
7  
8  
9  
10 576 Poly-A transcripts were enriched and the transcripts broken in the presence of Zn<sup>2+</sup>.  
11  
12 577 Subsequently, double-stranded cDNA was synthesized using random primers and RNase H.  
13  
14 578 After end repair and purification, the fragments were ligated with bar-coded paired-end  
15  
16 579 adapters, and fragments with insert sizes of approximately 150-250 bp were isolated from an  
17  
18 580 agarose gel. Each of the 15 samples derived from five tissues (heart, liver, stomach, pancreas  
19  
20 581 and intestine) at the three time points (fasted for one month, 24h and 48h post-feeding) were  
21  
22 582 amplified by PCR to generate DNA colonies template libraries and the libraries were then  
23  
24 583 purified. In addition, to sample as broadly from transcriptome as possible, we also produced  
25  
26 584 normalized libraries for each tissue in order to capture the reads from lowly expressed, tissue-  
27  
28 585 specific genes. Here, a part of the samples, which originating from the same tissue, were  
29  
30 586 pooled before the PCR analyses, i.e. in total five pooled samples were generated. These five  
31  
32 587 samples were split in two and after PCR amplification and library purification they were  
33  
34 588 normalized using two different normalization protocols, i.e. in total 10 normalized libraries  
35  
36 589 were prepared. Library quality of all 25 samples was then assessed by a titration-run (1 x 50  
37  
38 590 bp) on an Illumina HiSeq 2000 instrument. Finally, the sequencing was performed on the  
39  
40 591 same instrument using paired-reads (2 × 101 bp). One channel was used for the 15 non-  
41  
42 592 normalized libraries and one channel was used for the 10 normalized libraries.  
43  
44  
45  
46  
47  
48  
49  
50  
51  
52 593 Data pre-processing and *de novo* transcriptome assembly  
53  
54  
55  
56 594 To reduce the amount of erroneous data, the raw paired reads were processed by i) removing  
57  
58 595 reads that contained the sequencing adaptor, ii) removing reads that contained ambiguous  
59  
60  
61  
62  
63  
64  
65

596 characters (Ns), and iii) trimming bases that had ~~the~~ low average quality (Q<20) within a  
1  
2 597 sliding window of length 10.  
3  
4

5  
6 598 To develop a comprehensive transcriptomics resource for the Burmese python, all  
7  
8 599 high-quality reads from 25 libraries were pooled together for *de novo* assembly. To determine  
9  
10  
11 600 the optimal assembly, *de novo* assembly was performed using Velvet (version 1.2.03) [18]  
12  
13  
14 601 and Oases (version 0.2.06) [58] with different k-mer parameters. The performance of these  
15  
16 602 assemblies was assessed according to number of transcripts, total length of transcripts, N50  
17  
18 603 length, mean length, proportion of mapped reads and number of transcripts which length is  
19  
20  
21 604 larger than N50 (Supplementary Table S2).

#### 22 23 24 605 Assessment of the transcriptome assembly

25  
26  
27  
28 606 The transcriptome assembly was evaluated by rnaQUAST 1.4.0 with default parameters  
29  
30  
31 607 supplying reference genome sequences and genome annotation of Burmese python (GenBank  
32  
33 608 assembly accession: GCA\_000186305.2).

34  
35  
36  
37 609 BUSCO\_v2 [20] was used to test the completeness of transcriptome assembly with  
38  
39 610 dependencies NCBI BLAST+ 2.4.0 [59] and HMMER 3.1b2 [60]. The vertebrata lineage set  
40  
41  
42 611 was used and accessed on 28 Nov 2016.

#### 43 44 45 612 Transcriptome annotation

46  
47  
48 613 To assess the identity of the most closely related gene in other organisms, the assembled  
49  
50  
51 614 transcripts were compared with the sequences in the National Center for Biotechnology  
52  
53 615 Information (NCBI) non-redundant protein (nr) database using blastx [61] with an e-value  
54  
55 616 cut-off of 0.01. The nr annotation term of each transcript was assigned with the first best hit,  
56  
57  
58 617 which was not represented in uninformative description (e.g., 'hypothetical protein', 'novel  
59  
60 618 protein', 'unnamed protein product', 'predicted protein' or 'Uncharacterized protein')

1  
2  
3  
4  
5  
6  
7  
8  
9  
10  
11  
12  
13  
14  
15  
16  
17  
18  
19  
20  
21  
22  
23  
24  
25  
26  
27  
28  
29  
30  
31  
32  
33  
34  
35  
36  
37  
38  
39  
40  
41  
42  
43  
44  
45  
46  
47  
48  
49  
50  
51  
52  
53  
54  
55  
56  
57  
58  
59  
60  
61  
62  
63  
64  
65

619 (Supplementary Table S4). To assign functional annotations of transcripts, Blast2GO was  
620 used (e-value threshold = 0.01) to return GO annotation, Enzyme code annotation with  
621 KEGG maps and InterPro annotation.

#### 622 Estimation of gene expression values

623 For each 15 non-normalized libraries, the paired-end reads were firstly mapped back to  
624 assembled transcriptome using Bowtie2 [62]with default parameters, the raw counts then  
625 were calculated based on the alignment results using RSEM (version 1.1.20) [63] for each  
626 transcript. To quantify the gene expression level, for genes with alternative splicing  
627 transcripts, the longest transcript was selected to represent the gene, and a gene's abundance  
628 estimate was the sum of its transcripts' abundance estimates. Finally, the raw expression  
629 counts were normalized into FPKM with custom Perl scripts.

#### 630 PCA

631 To facilitate graphical interpretation of tissue relatedness, R function prcomp was used to  
632 perform PCA with genes which the maximum FPKM of 15 samples was greater than 100.

#### 633 Identification of DEGs and clustering analysis

634 For each tissue, DEGs were selected with two thresholds, 1) FPKM is greater than or equal to  
635 400 in at least one time point and 2) fold change (FC) is greater than or equal to two in at  
636 least one pairwise comparison among three time points. FPKM values of DEGs were log2-  
637 transformed and median-centered, then hierarchical clustering was performed using R  
638 command hclust with method = 'average' and distance = 'Spearman correlation' and results  
639 were displayed using R command heatmap.2.

641 Colored KEGG Pathway and GO enrichment analysis

1  
2  
3  
4 642 For each tissue, all assembled genes were mapped to KEGG human pathway maps using  
5  
6 643 KOBAS 2.0 [64] with e-value  $1e-50$ . Then genes were colored by representing FPKM value  
7  
8 644 and trend of differential expression value (Table 2).

10  
11  
12 645 Blast2GO was used to implement GO enrichment analysis (Fisher's exact test) with  
13  
14 646 threshold of FDR 0.001. The reference set is the whole transcripts with GO slim annotation.  
15  
16  
17 647 For each organ, the selected test set is either upregulated or highly expressed genes defined in  
18  
19 648 Table 2. Finally, we performed Blast2GO to reduce to most specific GO terms.

20  
21  
22  
23 649 Isolation of samples for proteomics analyses

24  
25  
26  
27 650 Two Burmese pythons (weighing 400 and 800 g, respectively) were fed a rodent meal  
28  
29 651 corresponding to approximately 25% of their body mass. Approximately 24 h into the  
30  
31  
32 652 postprandial period the animals were euthanized with an overdose of pentobarbital (100 mg  
33  
34 653  $\text{kg}^{-1}$ , i.m.). Immediately afterwards, an incision was made to expose the stomach, which was  
35  
36 654 then ligated at the lower oesophagus and the pylorus, before the intact stomach was excised  
37  
38  
39 655 by a cleavage just below the two sutures resulting in the stomach being released from the rest  
40  
41 656 of the animal. All undigested mouse remains were manually removed by forceps and 25  
42  
43  
44 657 ml/kg tris-buffered saline (TBS) was injected into the stomach. The stomach was then ligated  
45  
46 658 at the opened end, rinsed by gently shaking the tissue, and finally the digestive fluid-  
47  
48  
49 659 containing solution was collected and stored on ice. To ensure collection of all gastric fluid,  
50  
51 660 the stomach was rinsed additional two-three times with 12 ml/kg TBS. Subsequently, the  
52  
53  
54 661 samples were filtered and centrifuged, and the supernatant stored at  $-80\text{ }^{\circ}\text{C}$ . We also obtained  
55  
56 662 two samples of gastric juice from a third individual (200 g) that had been fed 4 g peptone  
57  
58 663 (Sigma Aldrich), suspended in water. Peptone is a mixture of small peptides and amino acids  
59  
60  
61  
62  
63  
64  
65

664 and the solution was injected directly into the stomach and after three hours the snake was  
1  
2 665 euthanized by an overdose of pentobarbital. The stomach was removed, rinsed with TBS, and  
3  
4  
5 666 a single sample collected and stored, as described above. We analysed two samples from each  
6  
7 667 of the three individuals, resulting in a total of six digestive fluid samples being analysed by  
8  
9  
10 668 MS/MS. In addition, we obtained a single plasma sample from each snake by direct cardiac  
11  
12 669 puncture followed by centrifugation and storage for later analysis.  
13  
14

#### 15 16 670 Sample preparation for mass spectrometry analyses 17

18  
19 671 The proteins in the six obtained python digestive fluid samples were recovered by  
20  
21  
22 672 trichloroacetic acid precipitation. The resulting pellets were resuspended in 8 M Urea, 5 mM  
23  
24 673 DTT, 0.1 M ammonium bicarbonate pH 8.0 and incubated for 30 minutes at room  
25  
26  
27 674 temperature in order to denature and reduce the proteins. Subsequently, the proteins were  
28  
29 675 alkylated by the addition of iodoacetamide to a final concentration of 25 mM. The samples  
30  
31  
32 676 were incubated for additional 20 minutes at room temperature and then diluted five times  
33  
34 677 with a 50 mM ammonium bicarbonate, pH 8.0 buffer before the addition of approximately 2  
35  
36 678  $\mu\text{g}$  sequencing grade modified trypsin (Promega) per 50  $\mu\text{g}$  protein in the sample.  
37  
38  
39 679 Subsequently, the samples were incubated at 37 °C for approximately 16 h. The proteins in  
40  
41 680 the plasma sample were denatured, reduced, alkylated, and digested with trypsin, as described  
42  
43  
44 681 for the digestive fluid samples. Finally, the resulting peptides in all samples were  
45  
46 682 micropurified and stored at -20 C until the LC-MS/MS analyses.  
47  
48

#### 49 50 683 Liquid chromatography-tandem mass spectrometry analyses 51

52  
53 684 Nano-liquid chromatography-tandem mass spectrometry (LC-MS/MS) analyses were  
54  
55  
56 685 performed on a nanoflow HPLC system (Thermo Scientific, EASY-nLC II) connected to a  
57  
58 686 mass spectrometer (TripleTOF 5600, AB Sciex) equipped with an electrospray ionization  
59  
60  
61  
62  
63  
64  
65

687 source (NanoSpray III, AB Sciex) and operated under Analyst TF 1.6 control. The samples  
688 were dissolved in 0.1% formic acid, injected, trapped and desalted isocratically on a  
689 precolumn whereupon the peptides were eluted and separated on an analytical column (16 cm  
690 × 75 µm i.d.) packed in-house with ReproSil-Pur C18-AQ 3 µm resin (Dr. Marisch GmbH).  
691 The peptides were eluted at a flow rate of 250 nL/min using a 50 min gradient from 5 % to 35  
692 % phase B (0.1 % formic acid and 90 % acetonitrile). An information dependent acquisition  
693 method was employed allowing up to 25 MS/MS spectra per cycle of 2.8 s.

#### 694 Protein identification and filtering of data

695 The six collected MS files, related to digested fluid, were converted to Mascot generic format  
696 (MGF) using the AB SCIEX MS Data Converter beta 1.3 (AB SCIEX) and the “proteinpilot  
697 MGF” parameters. Subsequently, the files were merged to a single MGF-file using Mascot  
698 daemon. The resulting file (encompassing 122538 MS/MS queries) was used to interrogate  
699 the 16693 *Mus musculus* sequences in the Swiss-Prot database (version 2014\_10) and the  
700 generated python database encompassing 21131 protein sequences using Mascot 2.5.0  
701 (Matrix Science)[65]. Trypsin, with up to one missed cleavage allowed, was selected as  
702 enzyme; carbamidomethyl was employed as fixed modification, and oxidation of methionine  
703 and proline was selected as variable modifications. The instrument setting was specified as  
704 ESI-QUAD-TOF, the mass accuracy of the precursor and product ions was 15 ppm and 0.2  
705 da respectively, and the significance threshold ( $p$ ) was set to 0.01 and an expect cut-off at  
706 0.005. The data obtained by the LC-MS/MS-analysis of the python plasma proteome was  
707 analysed as described for the digestive fluid samples, except that the *Mus musculus* sequences  
708 were not interrogated. This dataset contains 9224 MS/MS queries. All obtained results were  
709 subsequently parsed using MS Data Miner v. 1.3.0 [66], and protein hits were only accepted  
710 if they were identified based on two unique peptides. Semi-quantitative proteomics data was

1  
2 711 obtained using the emPAI-values given by the Mascot 2.5.0 software after analysis of the  
3 MS/MS data [67].  
4

5  
6 713 To identify the proteins secreted into the python stomach, identified python plasma  
7  
8 714 proteins, as well as the mouse protein homologs were removed from the list of identified  
9  
10 715 python digestive fluid proteins. With regard to the removal of prey protein homologs, the  
11  
12 716 overall mouse protein names were used to search the list of python proteins (e.g. “collagen”  
13  
14 717 was used as search term, not “collagen alpha-1(I) chain”) and to identify python proteins that  
15  
16 718 were identified based on homology with mouse. These proteins were removed from the list of  
17  
18 719 stomach-secreted python proteins. For each identified protein remaining on the list, we  
19  
20 720 reassessed the annotation of the python sequence, i.e. sequence comparisons were performed  
21  
22 721 using blastp version 2.2.30, and in addition, UniProt and NCBI protein databases, as well as  
23  
24 722 PubMed and SignalP 4.1, were interrogated to identify functional properties and cellular  
25  
26 723 location of the identified proteins. Plasma proteins, remaining collagen homologous,  
27  
28 724 intracellular proteins, and membrane proteins were discarded from the list of identified  
29  
30  
31  
32  
33  
34  
35 725 python stomach secretome proteins.  
36  
37  
38  
39  
40  
41  
42  
43  
44  
45  
46  
47  
48  
49  
50  
51  
52  
53  
54  
55  
56  
57  
58  
59  
60  
61  
62  
63  
64  
65



726 **List of abbreviations**

1  
2  
3  
4  
5  
6  
7  
8  
9  
10  
11  
12  
13  
14  
15  
16  
17  
18  
19  
20  
21  
22  
23  
24  
25  
26  
27  
28  
29  
30  
31  
32  
33  
34  
35  
36  
37  
38  
39  
40  
41  
42  
43  
44  
45  
46  
47  
48  
49  
50  
51  
52  
53  
54  
55  
56  
57  
58  
59  
60  
61  
62  
63  
64  
65

727 DEG differentially expressed genes

728 FC fold change

729 FPKM fragments per kilo base per million sequenced reads

730 PCA principal component analysis

731 **Declarations**  
1  
2  
3  
4 732 Ethics approval and consent to participate  
5  
6  
7 733 Not applicable  
8  
9  
10  
11 734  
12  
13  
14 735 Consent for publication  
15  
16  
17  
18 736 Not applicable  
19  
20  
21  
22 737  
23  
24  
25 738 Availability of data and material  
26  
27  
28  
29 739 The raw RNA-Seq sequencing data that support the findings of this study have been  
30  
31 740 deposited in the NCBI BioProject database (accession no. PRJNA343735).  
32  
33  
34 741 <https://www.ncbi.nlm.nih.gov/bioproject/PRJNA343735>  
35  
36  
37  
38 742  
39  
40  
41 743 Competing interests  
42  
43  
44  
45 744 The authors declare that they have no competing interests.  
46  
47  
48  
49 745  
50  
51  
52 746 Funding  
53  
54  
55  
56 747 This work was supported by a grant (Novenia) from the Danish Research Council for  
57  
58 748 Strategic Research (grant identification number: 09-067076).  
59  
60  
61  
62  
63  
64  
65

749

1  
2  
3  
4  
5  
6  
7  
8  
9  
10  
11  
12  
13  
14  
15  
16  
17  
18  
19  
20  
21  
22  
23  
24  
25  
26  
27  
28  
29  
30  
31  
32  
33  
34  
35  
36  
37  
38  
39  
40  
41  
42  
43  
44  
45  
46  
47  
48  
49  
50  
51  
52  
53  
54  
55  
56  
57  
58  
59  
60  
61  
62  
63  
64  
65

750 Authors' contributions

751 JD, KWS, TW and MHS designed the study. JD performed the transcriptome data analysis  
752 with input from LS and was a major contributor in writing the manuscript. SEL performed  
753 RNA-Seq lab experiment. KWS and JE performed the proteomics experiment and data  
754 analysis. WT interpreted the transcriptome data regarding digestion. All authors read and  
755 approved the final manuscript.

756

757 Acknowledgements

758 We thank Tania A. Nielsen (Aarhus, Denmark) for valuable assistance with RNA purification  
759 and Fasteris SA (Switzerland) for library preparation and Illumina sequencing.

760 **Figure and table legends**

1  
2  
3  
4 761 **Fig. 1. The workflow of Python RNA-Seq data analysis.** The diagram shows the main  
5  
6 762 steps and bioinformatics tools used in the study.

7  
8 763 **Fig. 2. PCA plots of FPKM of 1862 genes.** PC, principal component. PC1 represents 25%,  
9  
10 764 PC2 represents 18% and PC3 represents 16% of total variation in the data. The name of the  
11  
12 765 label consists two part, one capital letter plus one number. Letter H, S, I, L, P represent  
13  
14 766 heart, stomach, intestine, liver and pancreas respectively. Number 0, 1, 2 represent fasting  
15  
16  
17 767 for one month, 24h/1d after feeding and 48h/2d after feeding respectively.

18  
19 768 **Fig. 3. Heat maps from hierarchical clustering of DEGs in each tissue.** Heat maps  
20  
21 769 showing the hierarchically clustered Spearman correlation matrix resulting from comparing  
22  
23 770 the normalized FPKM value for each pair of genes. Heat map columns represent samples  
24  
25  
26 771 and rows correspond to genes. Expression values (FPKM) are  $\log_2$ -transformed and then  
27  
28 772 median-centered by gene. Relative levels of gene expression are represented by colors.  
29  
30 773 Pale colour is low expression and darker blue is high expression. Five sub-clusters labelled  
31  
32 774 a to e are shown with full annotation in Fig. 4-8.

33  
34  
35 775 **Fig. 4. The cluster of upregulated genes with NCBI nr annotation in stomach.** It shows  
36  
37 776 the cluster e in Fig. 3. Heat map columns represent samples and rows correspond to genes.  
38  
39 777 Expression values (FPKM) are  $\log_2$ -transformed and then median-centered by gene.  
40  
41 778 Relative levels of gene expression are represented by colors. Pale colour is low expression  
42  
43  
44 779 and darker blue is high expression.

45  
46 780 **Fig. 5. The cluster of upregulated genes with NCBI nr annotation in intestine.** It shows  
47  
48 781 the cluster b in Fig. 3. Heat map columns represent samples and rows correspond to genes.  
49  
50 782 Expression values (FPKM) are  $\log_2$ -transformed and then median-centered by gene.  
51  
52 783 Relative levels of gene expression are represented by colors. Pale colour is low expression  
53  
54  
55 784 and darker blue is high expression.

56  
57 785 **Fig. 6. The cluster of upregulated genes with NCBI nr annotation in heart.** It shows the  
58  
59 786 cluster a in Fig. 3. Heat map columns represent samples and rows correspond to genes.  
60

787 Expression values (FPKM) are  $\log_2$ -transformed and then median-centered by gene.

788 Relative levels of gene expression are represented by colors. Pale colour is low expression  
789 and darker blue is high expression.

790 **Fig. 7. The cluster of upregulated genes with NCBI nr annotation in liver.** It shows the  
791 cluster c in Fig. 3. Heat map columns represent samples and rows correspond to genes.

792 Expression values (FPKM) are  $\log_2$ -transformed and then median-centered by gene.

793 Relative levels of gene expression are represented by colors. Pale colour is low expression  
794 and darker blue is high expression.

795 **Fig. 8. The cluster of upregulated genes with NCBI nr annotation in pancreas.** It shows  
796 the cluster d in Fig. 3. Heat map columns represent samples and rows correspond to genes.

797 Expression values (FPKM) are  $\log_2$ -transformed and then median-centered by gene.

798 Relative levels of gene expression are represented by colors. Pale colour is low expression  
799 and darker blue is high expression.

800 **Fig. 9. The workflow used to identify the python's stomach secretome during**  
801 **digestion. 1)** Initially pythons were feed with mice, or a peptide mixture, and later the gastric  
802 juice samples were obtained and mice debris were removed. **2)** The proteins were  
803 precipitated, denatured and digested with trypsin. **3)** The resulting tryptic peptides were  
804 analysed by LC-MS/MS analyses and the data merged into a single file. **4)** The file was used  
805 to interrogate the in-house generated python protein sequence database (based on the  
806 transcriptomic data) and python proteins were identified. **5)** The data was filtered to remove  
807 mice proteins and plasma proteins. Subsequently, the annotation of the remaining proteins  
808 was reassessed and the secretome identified.

809 **Fig. 10. Cartoon depiction of colored KEGG pathway of gastric acid secretion in**  
810 **stomach.** Entry in red represents upregulated during digestion; Entry in purple for highly  
811 expressed. H/K is H<sup>+</sup>/K<sup>+</sup>-exchanging ATPase alpha polypeptide. CA is carbonic anhydrase.  
812 AE is solute carrier family 26 (anion exchange transporter).

813 **Table 1. Summary of transcriptome assembly of Burmese Python.**

814 **Table 2. Colour coding of genes in KEGG pathway maps.** Three criteria are used to  
1  
2 815 classify and colour genes. First, i) whether the maximum FPKM of the gene among fasting,  
3  
4 816 24h and 48h is over 10, then ii) whether the gene is differential expressed in at least one of  
5  
6 817 the pairwise comparison among fasting, 24h and 48h with FC over 4. Finally, iii) for those  
7  
8 818 genes expressed, but not differential expressed, whether it is highly expressed with  
9  
10  
11 819 maximum FPKM among three time points over 200. The term expression trend indicates the  
12  
13 820 trend of gene expression across fasting, 24h and 48h. e.g. The trend up means the gene is  
14  
15 821 upregulated from either fasting to 24h, fasting to 48h or 24h to 48h. The trend up-then-down  
16  
17 822 means the gene is firstly upregulated from fasting to 24h, then downregulated from 24h to  
18  
19 823 48h.

20  
21  
22 824 **Table 3. The number of DEGs across fasting, 24h and 48h in each tissue.** The  
23  
24 825 expression trend is consistent with definition in Table 2.  
25  
26  
27  
28  
29  
30  
31  
32  
33  
34  
35  
36  
37  
38  
39  
40  
41  
42  
43  
44  
45  
46  
47  
48  
49  
50  
51  
52  
53  
54  
55  
56  
57  
58  
59  
60  
61  
62  
63  
64  
65

- 1  
2  
3  
4 827 1. Secor SM, Diamond J: **A vertebrate model of extreme physiological**  
5 828 **regulation.** *Nature* 1998, **395**:659-662.
- 6 829 2. Cox CL, Secor SM: **Matched regulation of gastrointestinal performance in the**  
7 830 **Burmese python, *Python molurus*.** *J Exp Biol* 2008, **211**:1131-1140.
- 8  
9 831 3. Secor SM, Diamond J: **Adaptive responses to feeding in Burmese pythons:**  
10 832 **pay before pumping.** *J Exp Biol* 1995, **198**:1313-1325.
- 11 833 4. Secor SM, Diamond JM: **Evolution of regulatory responses to feeding in**  
12 834 **snakes.** *Physiological and Biochemical Zoology* 2000, **73**:123-141.
- 13 835 5. Aubret F, Shine R, Bonnet X: **Evolutionary biology: adaptive developmental**  
14 836 **plasticity in snakes.** *Nature* 2004, **431**:261-262.
- 15 837 6. Cohn MJ, Tickle C: **Developmental basis of limblessness and axial patterning**  
17 838 **in snakes.** *Nature* 1999, **399**:474-479.
- 18 839 7. Ott BD, Secor SM: **Adaptive regulation of digestive performance in the genus**  
20 840 ***Python*.** *J Exp Biol* 2007, **210**:340-356.
- 21 841 8. Secor SM: **Digestive physiology of the Burmese python: broad regulation of**  
22 842 **integrated performance.** *J Exp Biol* 2008, **211**:3767-3774.
- 23 843 9. Zaar M, Overgaard J, Gesser H, Wang T: **Contractile properties of the**  
24 844 **functionally divided python heart: two sides of the same matter.** *Comp*  
25 845 *Biochem Physiol A Mol Integr Physiol* 2007, **146**:163-173.
- 27 846 10. Andersen JB, Rourke BC, Caiozzo VJ, Bennett AF, Hicks JW: **Physiology:**  
28 847 **postprandial cardiac hypertrophy in pythons.** *Nature* 2005, **434**:37-38.
- 29 848 11. Vidal N, Hedges SB: **Molecular evidence for a terrestrial origin of snakes.**  
31 849 *Proc Biol Sci* 2004, **271 Suppl 4**:S226-229.
- 32 850 12. Castoe TA, de Koning AP, Hall KT, Card DC, Schield DR, Fujita MK, Ruggiero RP,  
33 851 Degner JF, Daza JM, Gu W, et al: **The Burmese python genome reveals the**  
34 852 **molecular basis for extreme adaptation in snakes.** *Proc Natl Acad Sci U S A*  
36 853 2013, **110**:20645-20650.
- 37 854 13. Andrew AL, Card DC, Ruggiero RP, Schield DR, Adams RH, Pollock DD, Secor SM,  
38 855 Castoe TA: **Rapid changes in gene expression direct rapid shifts in intestinal**  
39 856 **form and function in the Burmese python after feeding.** *Physiol Genomics*  
41 857 2015, **47**:147-157.
- 42 858 14. Castoe TA, Fox SE, Jason de Koning A, Poole AW, Daza JM, Smith EN, Mockler TC,  
43 859 Secor SM, Pollock DD: **A multi-organ transcriptome resource for the**  
44 860 **Burmese Python (*Python molurus bivittatus*).** *BMC Res Notes* 2011, **4**:310.
- 45 861 15. Wang Z, Gerstein M, Snyder M: **RNA-Seq: a revolutionary tool for**  
47 862 **transcriptomics.** *Nat Rev Genet* 2009, **10**:57-63.
- 48 863 16. Mortazavi A, Williams BA, McCue K, Schaeffer L, Wold B: **Mapping and**  
49 864 **quantifying mammalian transcriptomes by RNA-Seq.** *Nat Methods* 2008,  
50 865 **5**:621-628.
- 52 866 17. Wang T, Hung CC, Randall DJ: **The comparative physiology of food**  
53 867 **deprivation: from feast to famine.** *Annu Rev Physiol* 2006, **68**:223-251.
- 54 868 18. Zerbino DR, Birney E: **Velvet: algorithms for de novo short read assembly**  
55 869 **using de Bruijn graphs.** *Genome Res* 2008, **18**:821-829.
- 57 870 19. Bushmanova E, Antipov D, Lapidus A, Suvorov V, Prjibelski AD: **rnaQUAST: a**  
58 871 **quality assessment tool for de novo transcriptome assemblies.**  
59 872 *Bioinformatics* 2016, **32**:2210-2212.

- 873 20. Simão FA, Waterhouse RM, Ioannidis P, Kriventseva EV, Zdobnov EM: **BUSCO:**  
1 874 **assessing genome assembly and annotation completeness with single-copy**  
2 875 **orthologs.** *Bioinformatics* 2015:btv351.
- 3 876 21. Pruitt KD, Tatusova T, Maglott DR: **NCBI reference sequences (RefSeq): a**  
4 877 **curated non-redundant sequence database of genomes, transcripts and**  
5 878 **proteins.** *Nucleic Acids Res* 2007, **35**:D61-65.
- 6 879 22. Benton MJ: **Phylogeny of the major tetrapod groups: morphological data and**  
7 880 **divergence dates.** *J Mol Evol* 1990, **30**:409-424.
- 8 881 23. Conesa A, Gotz S, Garcia-Gomez JM, Terol J, Talon M, Robles M: **Blast2GO: a**  
9 882 **universal tool for annotation, visualization and analysis in functional**  
10 883 **genomics research.** *Bioinformatics* 2005, **21**:3674-3676.
- 11 884 24. Hunter S, Apweiler R, Attwood TK, Bairoch A, Bateman A, Binns D, Bork P, Das U,  
12 885 Daugherty L, Duquenne L, et al: **InterPro: the integrative protein signature**  
13 886 **database.** *Nucleic Acids Res* 2009, **37**:D211-215.
- 14 887 25. Trapnell C, Williams BA, Pertea G, Mortazavi A, Kwan G, van Baren MJ, Salzberg  
15 888 SL, Wold BJ, Pachter L: **Transcript assembly and quantification by RNA-Seq**  
16 889 **reveals unannotated transcripts and isoform switching during cell**  
17 890 **differentiation.** *Nat Biotechnol* 2010, **28**:511-515.
- 18 891 26. Fan HP, Di Liao C, Fu BY, Lam LC, Tang NL: **Interindividual and interethnic**  
19 892 **variation in genomewide gene expression: insights into the biological**  
20 893 **variation of gene expression and clinical implications.** *Clin Chem* 2009,  
21 894 **55**:774-785.
- 22 895 27. Kanehisa M, Goto S, Sato Y, Furumichi M, Tanabe M: **KEGG for integration and**  
23 896 **interpretation of large-scale molecular data sets.** *Nucleic Acids Res* 2012,  
24 897 **40**:D109-114.
- 25 898 28. Kanehisa M, Goto S: **KEGG: kyoto encyclopedia of genes and genomes.** *Nucleic*  
26 899 *Acids Res* 2000, **28**:27-30.
- 27 900 29. Kageyama T: **Pepsinogens, progastricsins, and prochymosins: structure,**  
28 901 **function, evolution, and development.** *Cell Mol Life Sci* 2002, **59**:288-306.
- 29 902 30. Hayashi K, Agata K, Mochii M, Yasugi S, Eguchi G, Mizuno T: **Molecular cloning**  
30 903 **and the nucleotide sequence of cDNA for embryonic chicken pepsinogen:**  
31 904 **phylogenetic relationship with prochymosin.** *J Biochem* 1988, **103**:290-296.
- 32 905 31. Watanuki K, Yasugi S: **Analysis of transcription regulatory regions of**  
33 906 **embryonic chicken pepsinogen (ECPg) gene.** *Dev Dyn* 2003, **228**:51-58.
- 34 907 32. Aoki N, Deshimaru M, Terada S: **Active fragments of the antihemorrhagic**  
35 908 **protein HSF from serum of habu (*Trimeresurus flavoviridis*).** *Toxicon* 2007,  
36 909 **49**:653-662.
- 37 910 33. Perales J, Neves-Ferreira AG, Valente RH, Domont GB: **Natural inhibitors of**  
38 911 **snake venom hemorrhagic metalloproteinases.** *Toxicon* 2005, **45**:1013-1020.
- 39 912 34. Tomihara Y, Yonaha K, Nozaki M, Yamakawa M, Kawamura Y, Kamura T, Toyama  
40 913 S: **Purification of an antihemorrhagic factor from the serum of the non-**  
41 914 **venomous snake *Dinodon semicarinatus*.** *Toxicon* 1988, **26**:420-423.
- 42 915 35. Lee HJ, Sorimachi H, Jeong SY, Ishiura S, Suzuki K: **Molecular cloning and**  
43 916 **characterization of a novel tissue-specific calpain predominantly**  
44 917 **expressed in the digestive tract.** *Biol Chem* 1998, **379**:175-183.
- 45 918 36. Secor SM: **Gastric function and its contribution to the postprandial**  
46 919 **metabolic response of the Burmese python *Python molurus*.** *Journal of*  
47 920 *Experimental Biology* 2003, **206**:1621-1630.



- 921 37. Bessler SM, Secor SM: **Effects of feeding on luminal pH and morphology of**  
1 922 **the gastroesophageal junction of snakes.** *Zoology (Jena)* 2012, **115**:319-329.
- 2 923 38. Helmstetter C, Pope RK, T'Flachebba M, Secor SM, Lignot J-H: **The effects of**  
3 924 **feeding on cell morphology and proliferation of the gastrointestinal tract of**  
4 925 **juvenile Burmese pythons (*Python molurus*).** *Canadian Journal of Zoology*  
5 926 2009, **87**:1255-1267.
- 7 927 39. Enok S, Simonsen LS, Wang T: **The contribution of gastric digestion and**  
8 928 **ingestion of amino acids on the postprandial rise in oxygen consumption,**  
9 929 **heart rate and growth of visceral organs in pythons.** *Comp Biochem Physiol A*  
10 930 *Mol Integr Physiol* 2013, **165**:46-53.
- 12 931 40. Nørsgaard S, Andreassen K, Malte CL, Enok S, Wang T: **Low cost of gastric acid**  
13 932 **secretion during digestion in ball pythons.** *Comparative Biochemistry and*  
14 933 *Physiology Part A: Molecular & Integrative Physiology* 2016, **194**:62-66.
- 16 934 41. Secor SM, Taylor JR, Grosell M: **Selected regulation of gastrointestinal acid-**  
17 935 **base secretion and tissue metabolism for the diamondback water snake**  
18 936 **and Burmese python.** *J Exp Biol* 2012, **215**:185-196.
- 20 937 42. Andrade DV, De Toledo LF, Abe AS, Wang T: **Ventilatory compensation of the**  
21 938 **alkaline tide during digestion in the snake *Boa constrictor*.** *J Exp Biol* 2004,  
22 939 **207**:1379-1385.
- 23 940 43. Koelz HR: **Gastric acid in vertebrates.** *Scand J Gastroenterol Suppl* 1992, **193**:2-  
24 941 6.
- 26 942 44. Starck JM, Beese K: **Structural flexibility of the intestine of Burmese python**  
27 943 **in response to feeding.** *Journal of Experimental Biology* 2001, **204**:325-335.
- 28 944 45. Holmberg A, Kaim J, Persson A, Jensen J, Wang T, Holmgren S: **Effects of**  
29 945 **digestive status on the reptilian gut.** *Comparative Biochemistry and Physiology*  
30 946 *a-Molecular and Integrative Physiology* 2002, **133**:499-518.
- 32 947 46. Lignot JH, Helmstetter C, Secor SM: **Postprandial morphological response of**  
33 948 **the intestinal epithelium of the Burmese python (*Python molurus*).** *Comp*  
34 949 *Biochem Physiol A Mol Integr Physiol* 2005, **141**:280-291.
- 36 950 47. Secor SM, Whang EE, Lane JS, Ashley SW, Diamond J: **Luminal and systemic**  
37 951 **signals trigger intestinal adaptation in the juvenile python.** *American Journal*  
38 952 *of Physiology-Gastrointestinal and Liver Physiology* 2000, **279**:G1177-G1187.
- 39 953 48. Overgaard J, Andersen JB, Wang T: **The effects of fasting duration on the**  
40 954 **metabolic response to feeding in *Python molurus*: an evaluation of the**  
41 955 **energetic costs associated with gastrointestinal growth and upregulation.**  
42 956 *Physiol Biochem Zool* 2002, **75**:360-368.
- 44 957 49. Secor SM, White SE: **Prioritizing blood flow: cardiovascular performance in**  
45 958 **response to the competing demands of locomotion and digestion for the**  
46 959 **Burmese python, *Python molurus*.** *J Exp Biol* 2010, **213**:78-88.
- 48 960 50. Secor SM, Hicks JW, Bennett AF: **Ventilatory and cardiovascular responses of**  
49 961 **a python (*Python molurus*) to exercise and digestion.** *J Exp Biol* 2000,  
50 962 **203**:2447-2454.
- 52 963 51. Skovgaard N, Møller K, Gesser H, Wang T: **Histamine induces postprandial**  
53 964 **tachycardia through a direct effect on cardiac H<sub>2</sub>-receptors in pythons.**  
54 965 *American Journal of Physiology - Regulatory, Integrative and Comparative*  
55 966 *Physiology* 2009, **296**:R774-R785.
- 57 967 52. Enok S, Simonsen LS, Pedersen SV, Wang T, Skovgaard N: **Humoral regulation**  
58 968 **of heart rate during digestion in pythons (*Python molurus* and *Python***  
59 969 ***regius*).** *Am J Physiol Regul Integr Comp Physiol* 2012, **302**:R1176-1183.

- 970 53. Riquelme CA, Magida JA, Harrison BC, Wall CE, Marr TG, Secor SM, Leinwand LA:  
1 971 **Fatty acids identified in the Burmese python promote beneficial cardiac**  
2 972 **growth.** *Science* 2011, **334**:528-531.
- 3 973 54. Enok S, Leite G, Leite C, Gesser H, Hedrick MS, Wang T: **Improved cardiac filling**  
4 974 **facilitates the postprandial elevation of stroke volume in Python regius.** *J*  
5 975 *Exp Biol* 2016.
- 6 976 55. Slay CE, Enok S, Hicks JW, Wang T: **Reduction of blood oxygen levels enhances**  
7 977 **postprandial cardiac hypertrophy in Burmese python (Python bivittatus).** *J*  
8 978 *Exp Biol* 2014, **217**:1784-1789.
- 9 979 56. Jensen B, Larsen CK, Nielsen JM, Simonsen LS, Wang T: **Change of cardiac**  
10 980 **function, but not form, in postprandial pythons.** *Comp Biochem Physiol A Mol*  
11 981 *Integr Physiol* 2011, **160**:35-42.
- 12 982 57. Butler MW, Lutz TJ, Fokidis HB, Stahlschmidt ZR: **Eating increases oxidative**  
13 983 **damage in a reptile.** *J Exp Biol* 2016, **219**:1969-1973.
- 14 984 58. Schulz MH, Zerbino DR, Vingron M, Birney E: **Oases: robust de novo RNA-seq**  
15 985 **assembly across the dynamic range of expression levels.** *Bioinformatics*  
16 986 2012, **28**:1086-1092.
- 17 987 59. Camacho C, Coulouris G, Avagyan V, Ma N, Papadopoulos J, Bealer K, Madden TL:  
18 988 **BLAST+: architecture and applications.** *BMC Bioinformatics* 2009, **10**:421.
- 19 989 60. Eddy SR: **A probabilistic model of local sequence alignment that simplifies**  
20 990 **statistical significance estimation.** *PLoS Comput Biol* 2008, **4**:e1000069.
- 21 991 61. Altschul SF, Gish W, Miller W, Myers EW, Lipman DJ: **Basic local alignment**  
22 992 **search tool.** *J Mol Biol* 1990, **215**:403-410.
- 23 993 62. Langmead B, Salzberg SL: **Fast gapped-read alignment with Bowtie 2.** *Nat*  
24 994 *Methods* 2012, **9**:357-359.
- 25 995 63. Li B, Dewey CN: **RSEM: accurate transcript quantification from RNA-Seq data**  
26 996 **with or without a reference genome.** *BMC Bioinformatics* 2011, **12**:323.
- 27 997 64. Xie C, Mao X, Huang J, Ding Y, Wu J, Dong S, Kong L, Gao G, Li CY, Wei L: **KOBAS**  
28 998 **2.0: a web server for annotation and identification of enriched pathways**  
29 999 **and diseases.** *Nucleic Acids Res* 2011, **39**:W316-322.
- 30 1000 65. Perkins DN, Pappin DJC, Creasy DM, Cottrell JS: **Probability-based protein**  
31 1001 **identification by searching sequence databases using mass spectrometry**  
32 1002 **data.** *Electrophoresis* 1999, **20**:3551-3567.
- 33 1003 66. Dyrlund TF, Poulsen ET, Scavenius C, Sanggaard KW, Enghild JJ: **MS Data Miner:**  
34 1004 **A web-based software tool to analyze, compare, and share mass**  
35 1005 **spectrometry protein identifications.** *Proteomics* 2012, **12**:2792-2796.
- 36 1006 67. Ishihama Y, Oda Y, Tabata T, Sato T, Nagasu T, Rappsilber J, Mann M:  
37 1007 **Exponentially modified protein abundance index (emPAI) for estimation of**  
38 1008 **absolute protein amount in proteomics by the number of sequenced**  
39 1009 **peptides per protein.** *Mol Cell Proteomics* 2005, **4**:1265-1272.
- 40 1010

| <b>Parameter</b>                   | <b><i>De novo</i> assembly</b> |
|------------------------------------|--------------------------------|
| Total transcripts                  | 34,423                         |
| Annotated transcripts with nr NCBI | 19,713                         |
| Annotated transcripts with GO term | 16,992                         |
| Minimum transcript size (nt)       | 100                            |
| Medium transcript size (nt)        | 605                            |
| Mean transcript size (nt)          | 1,034                          |
| Largest transcript (nt)            | 26,010                         |
| N50                                | 6,240                          |
| N50 size (nt)                      | 1,673                          |
| Total assembled bases (Mb)         | 35.6                           |

| Expression level  | Fold change level | Expression trend<br>(fasting -> 24h -> 48h)  | Color code |
|-------------------|-------------------|----------------------------------------------|------------|
| max FPKM over 10  | FC over 4         | Up-regulated                                 | Red        |
|                   |                   | Down-regulated                               | Blue       |
|                   |                   | Up-then-down regulated                       | Yellow     |
|                   |                   | Down-then-up regulated                       | Brown      |
|                   | FC below 4        | Highly expressed<br>(max FPKM over 200)      | Purple     |
|                   |                   | Moderately expressed (max<br>FPKM below 200) | Pink       |
| max FPKM below 10 | -                 | Lowly expressed                              | Darkgrey   |

| <b>Expression trend<br/>(fasting -&gt; 24h -&gt; 48h)</b> | <b>Stomach</b>       | <b>Intestine</b>     | <b>Pancreas</b>      | <b>Liver</b>         | <b>Heart</b>         |
|-----------------------------------------------------------|----------------------|----------------------|----------------------|----------------------|----------------------|
| Up-regulated                                              | 932 (2.9%)           | 1,131 (3.5%)         | 859 (2.6%)           | 1,047 (3.2%)         | 184 (0.6%)           |
| Up-then-down regulated                                    | 28 (0.1%)            | 31 (0.1%)            | 150 (0.5%)           | 61 (0.2%)            | 6 (0.0%)             |
| Down-regulated                                            | 869 (2.7%)           | 625 (1.9%)           | 567 (1.7%)           | 618 (1.9%)           | 168 (0.5%)           |
| Down-then-up regulated                                    | 36 (0.1%)            | 45 (0.1%)            | 127 (0.4%)           | 90 (0.3%)            | 16 (0.1%)            |
| Highly expressed                                          | 199 (0.6%)           | 211 (0.7%)           | 225 (0.7%)           | 354 (1.1%)           | 232 (0.7%)           |
| Moderately expressed                                      | 5,541 (17.0%)        | 5,582 (17.2%)        | 4,933 (15.2%)        | 5,385 (16.5%)        | 6,044 (18.6%)        |
| Lowly expressed                                           | 24,926 (76.6%)       | 24,906 (76.5%)       | 25,670 (78.9%)       | 24,976 (76.8%)       | 25,881 (79.5%)       |
| <b>Total</b>                                              | <b>32,531 (100%)</b> | <b>32,531 (100%)</b> | <b>32,531 (100%)</b> | <b>32,531 (100%)</b> | <b>32,531 (100%)</b> |

Figure 1

[Click here to download Figure Figure1.pdf](#)

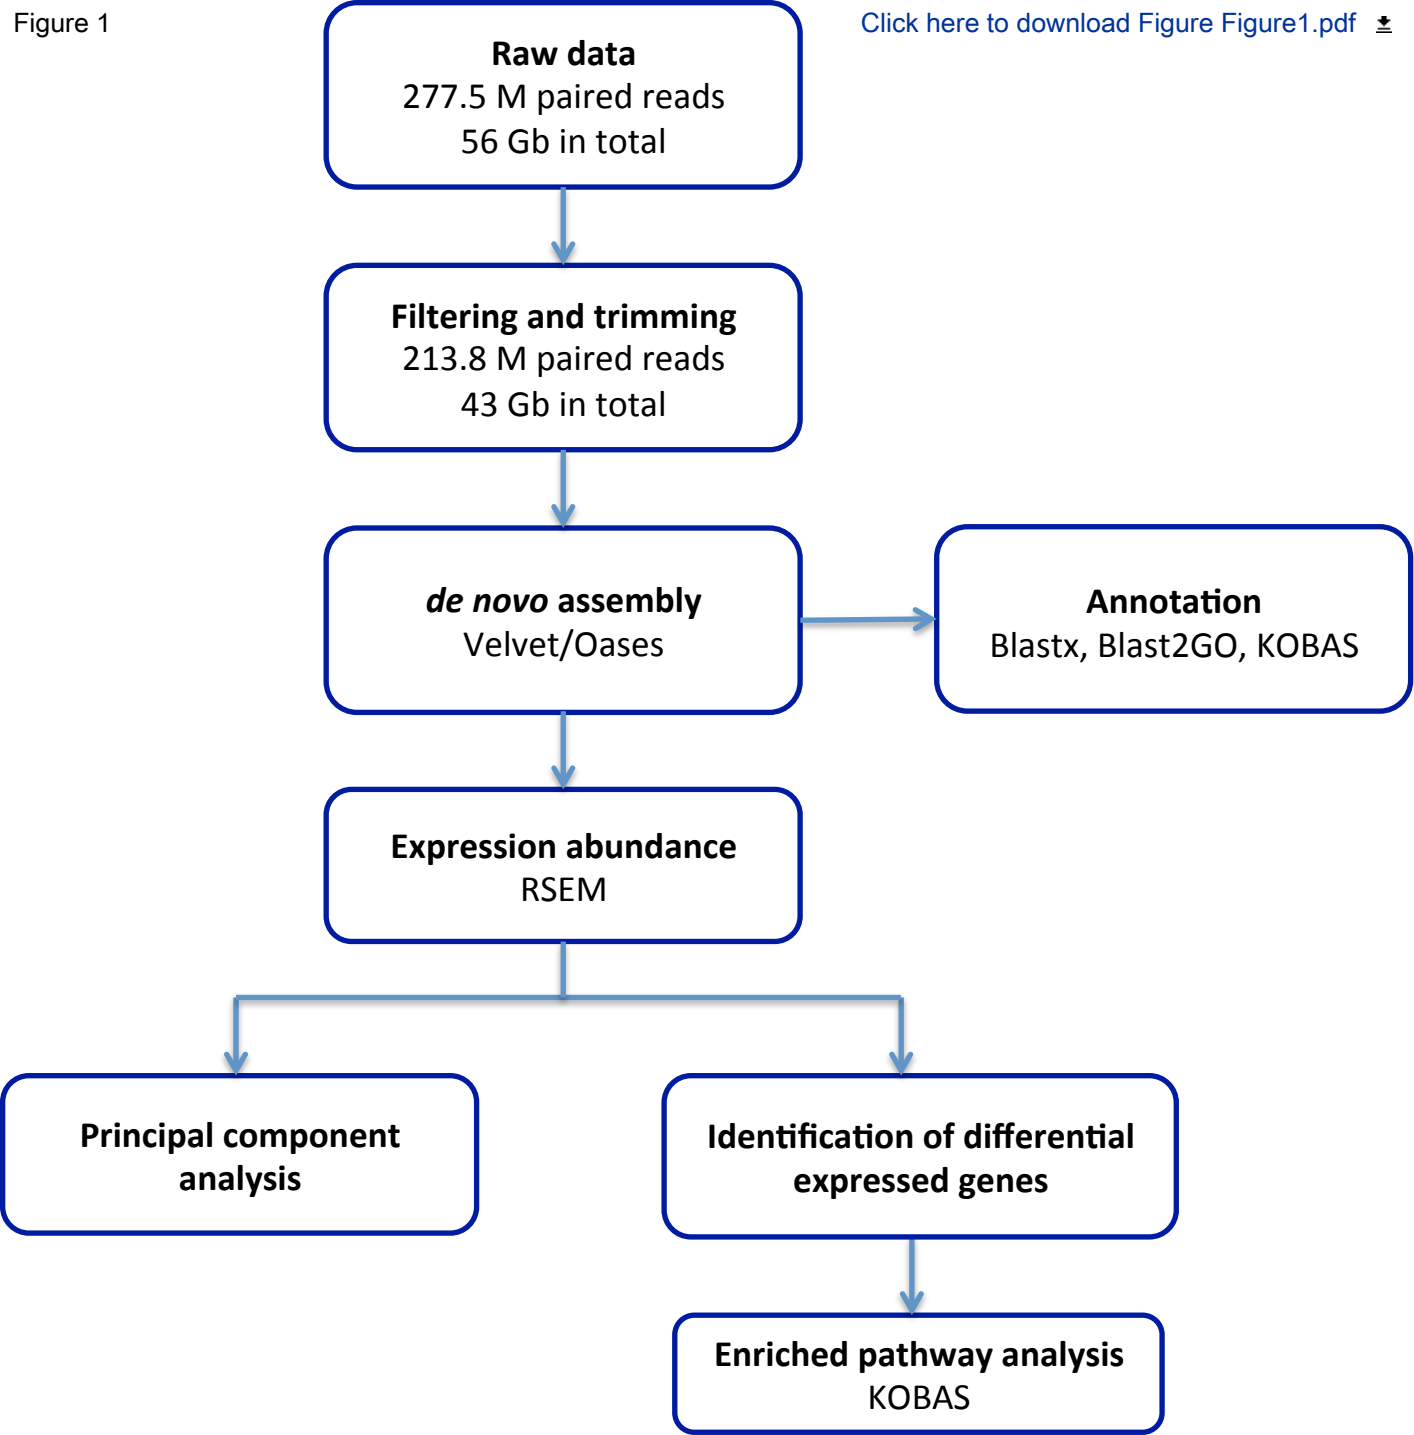

Figure 2

[Click here to download Figure2.pdf](#)

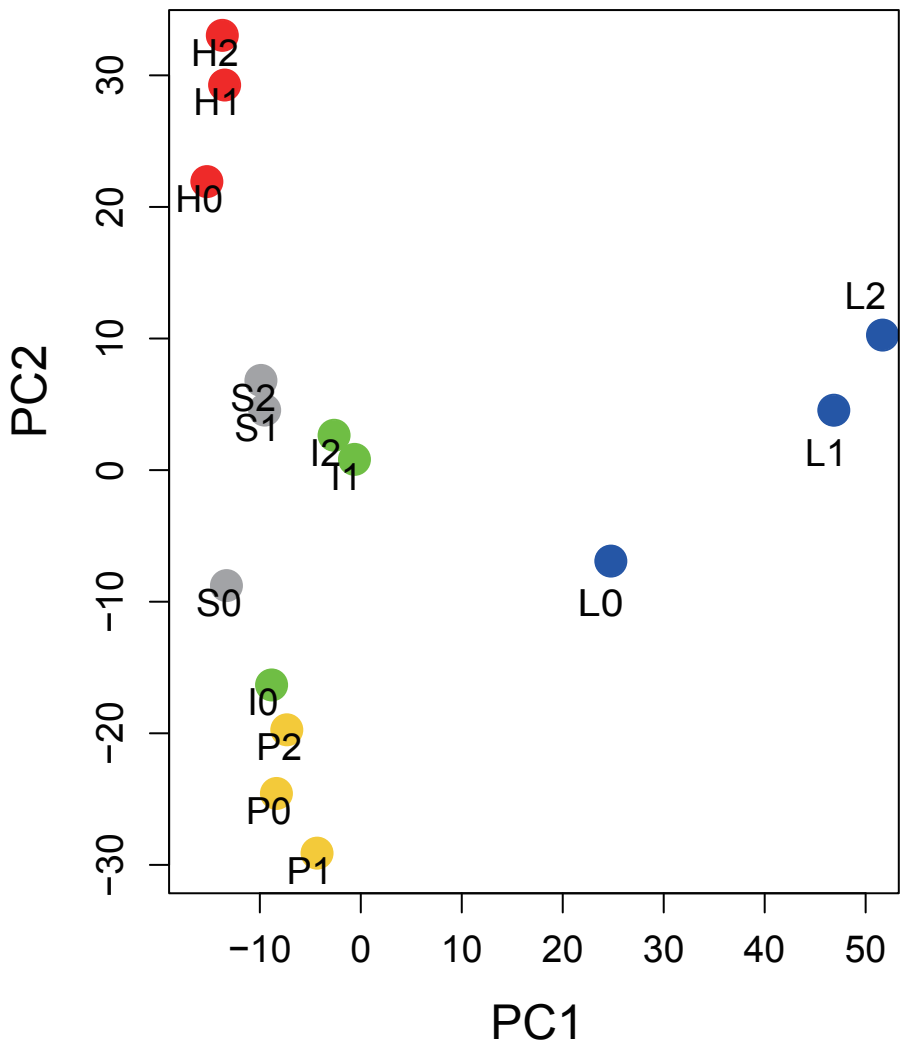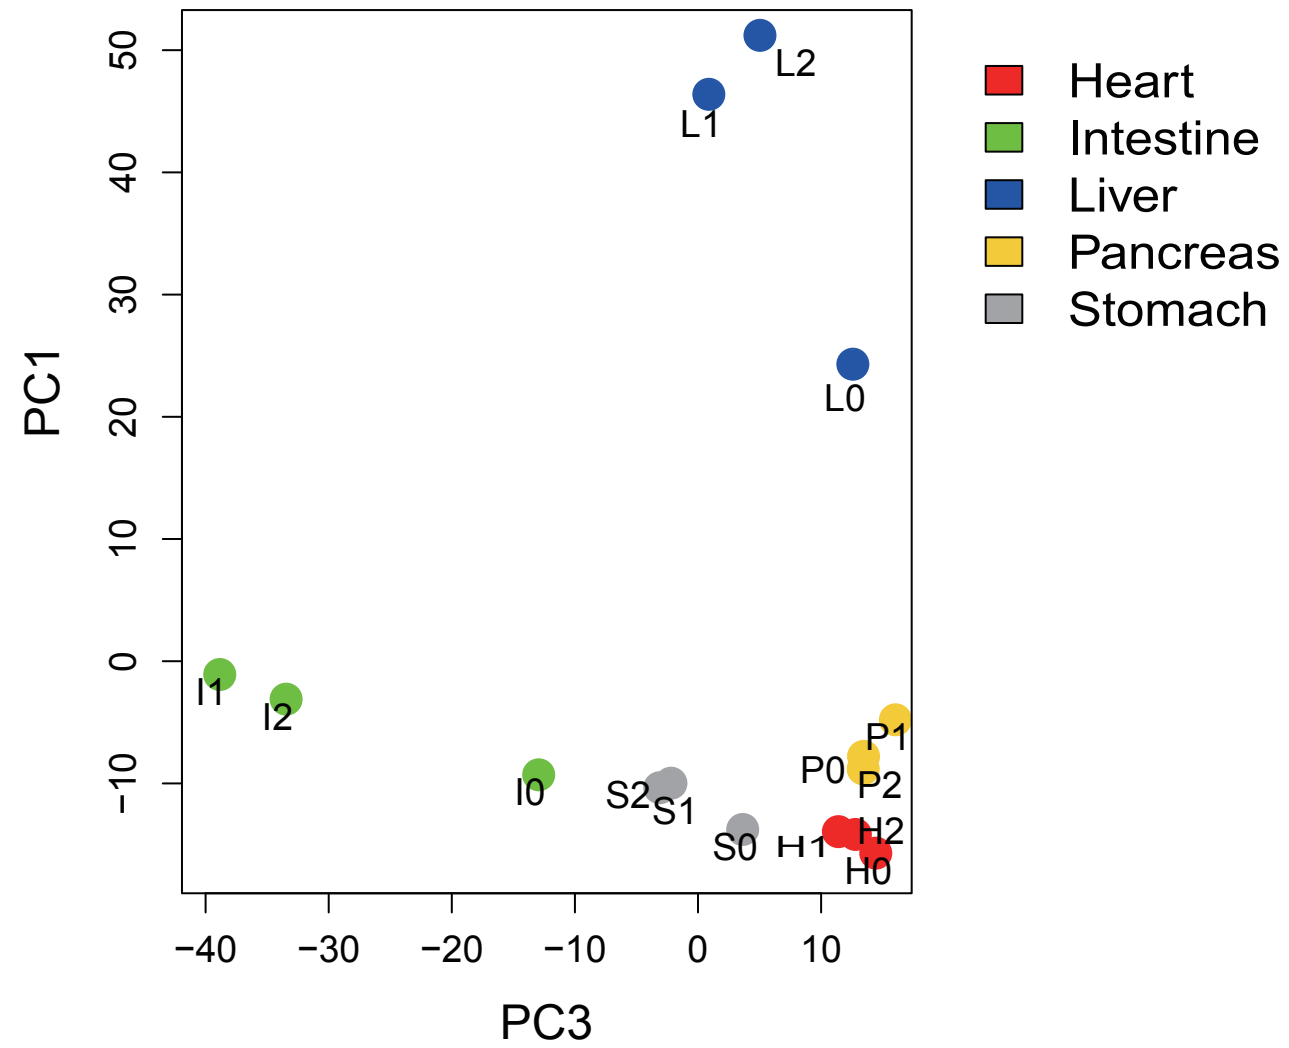

- Heart
- Intestine
- Liver
- Pancreas
- Stomach

Figure 3

[Click here to download Figure Figure3.pdf](#)

Heart

Intestine

Liver

Pancreas

Stomach

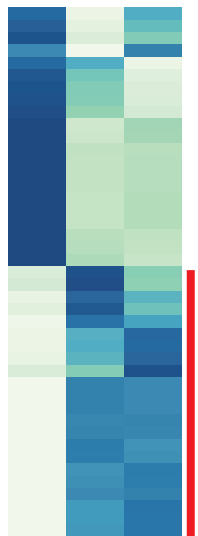

a

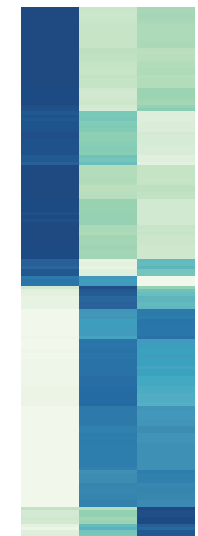

b

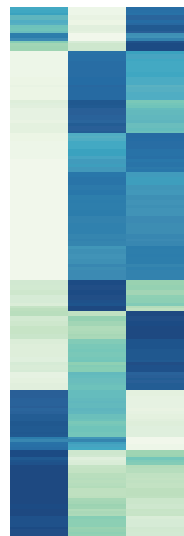

c

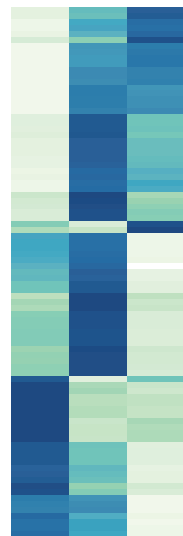

d

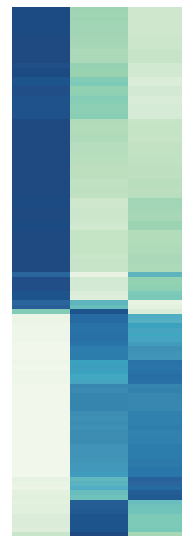

e

Color Key

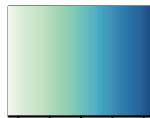

-1 0 1

0 1 2

days after feeding



Figure 4

## Stomach

[Click here to download Figure4.pdf](#)
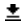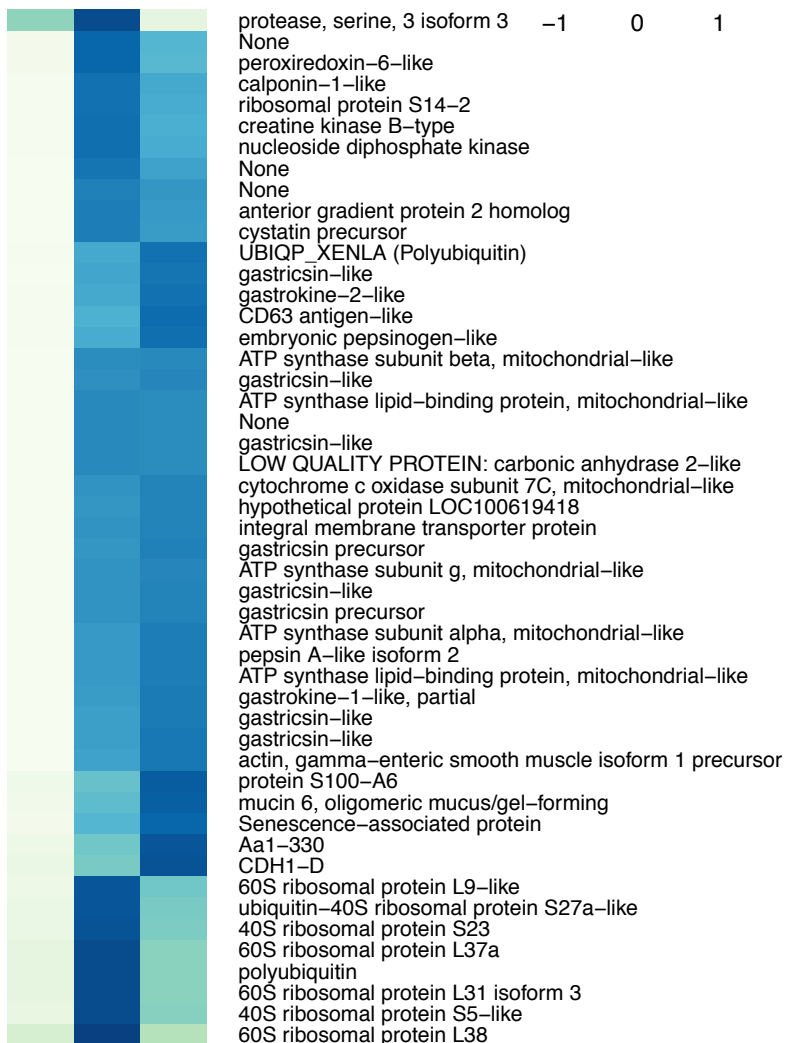

0 1 2

days after feeding

Figure 5

[Click here to download Figure5.pdf](#)

## Intestine

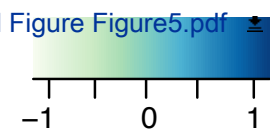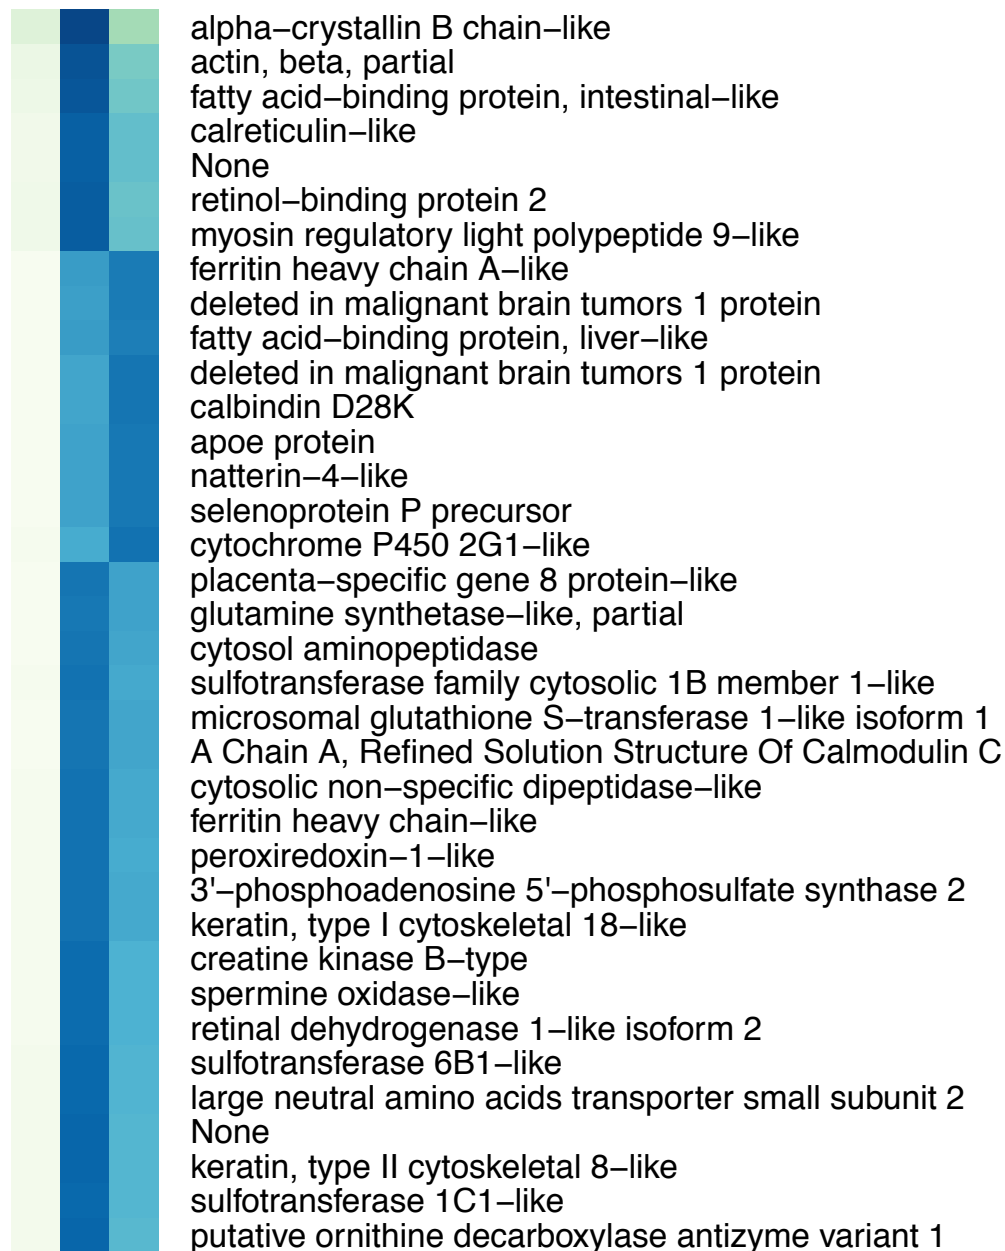

0 1 2

days after feeding

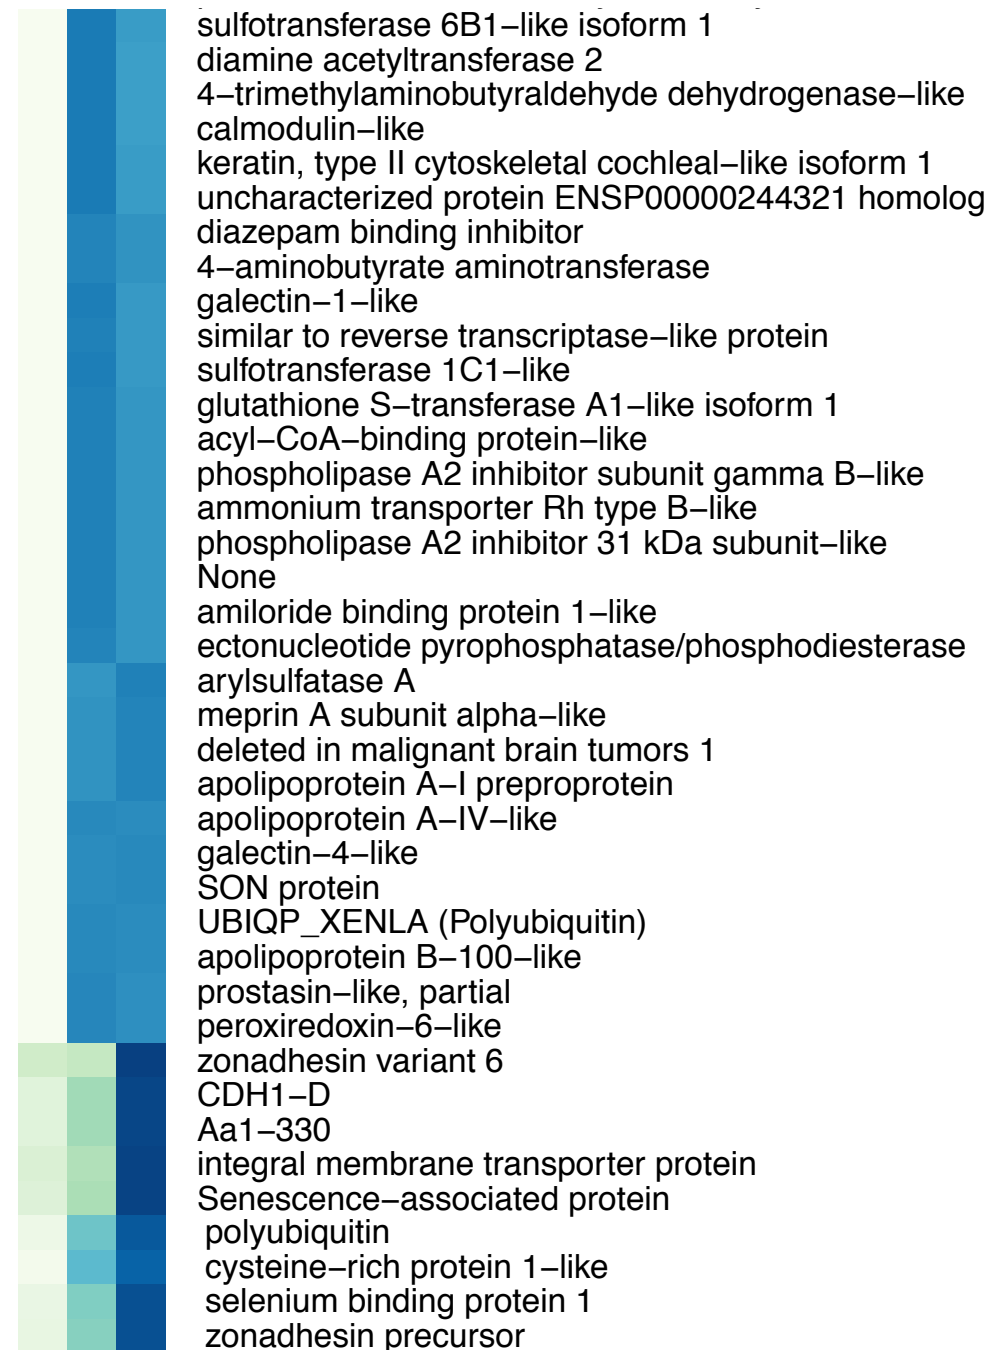

0 1 2

days after feeding

Figure 6

## Heart

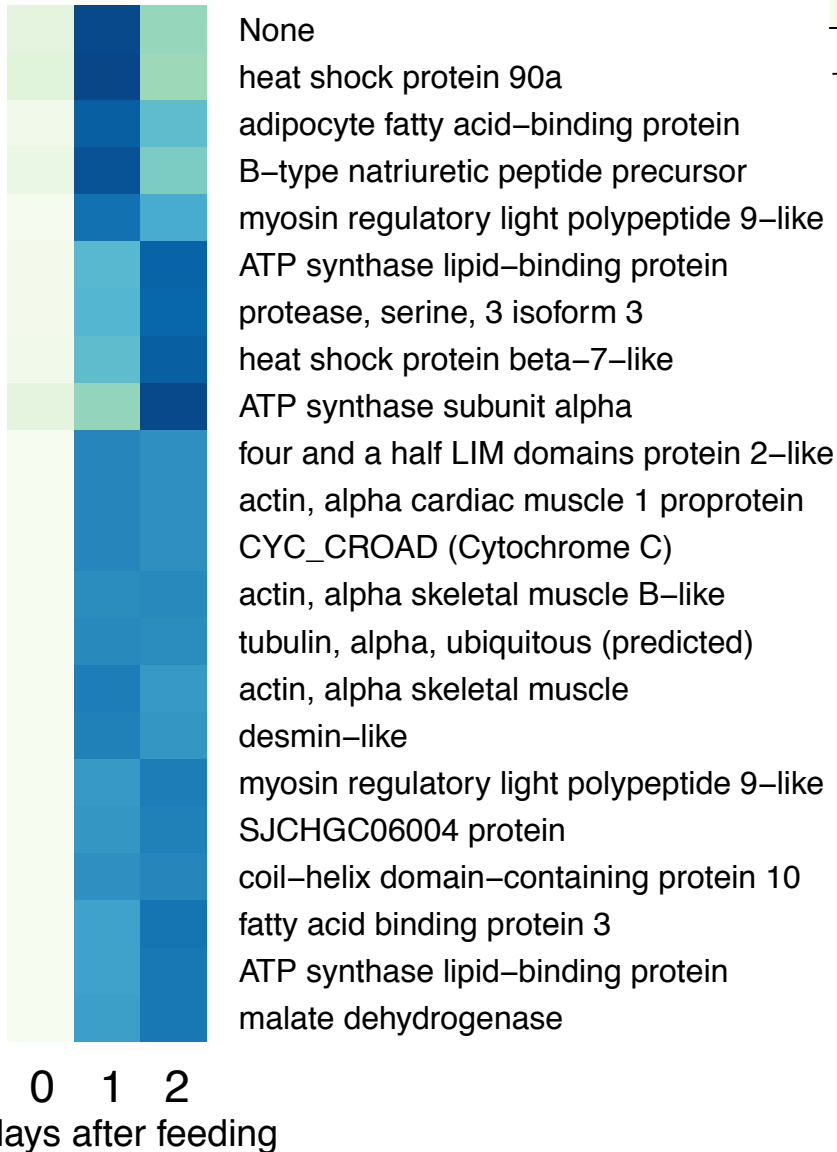

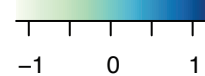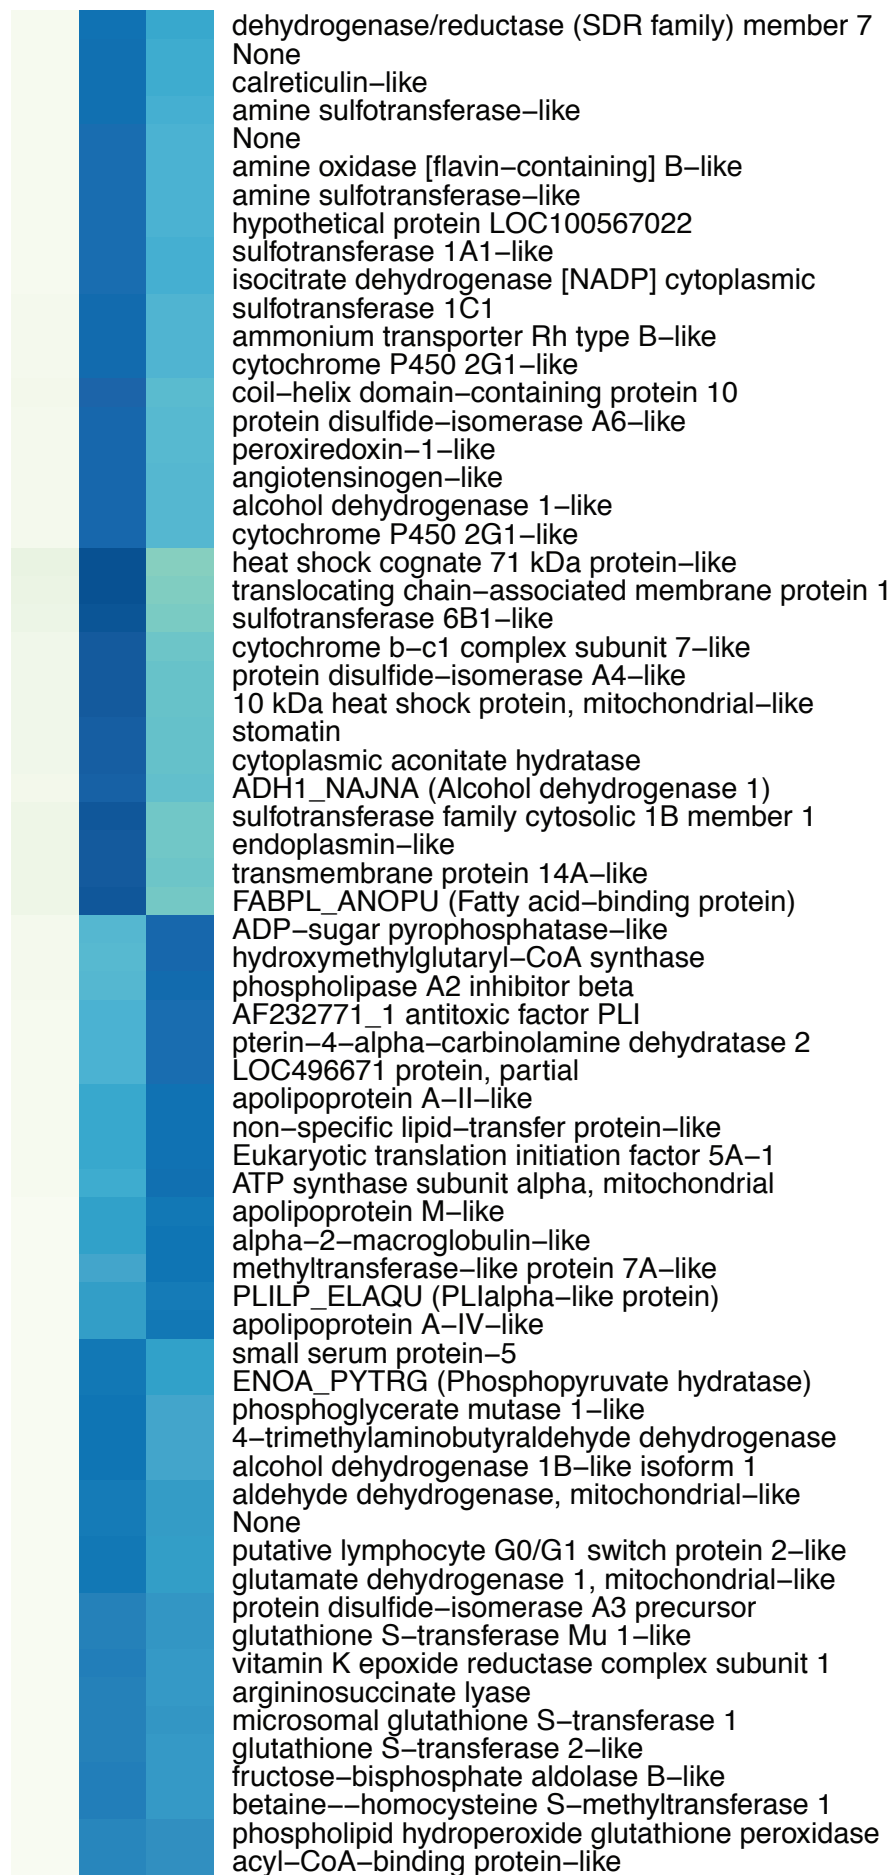

0 1 2

days after feeding

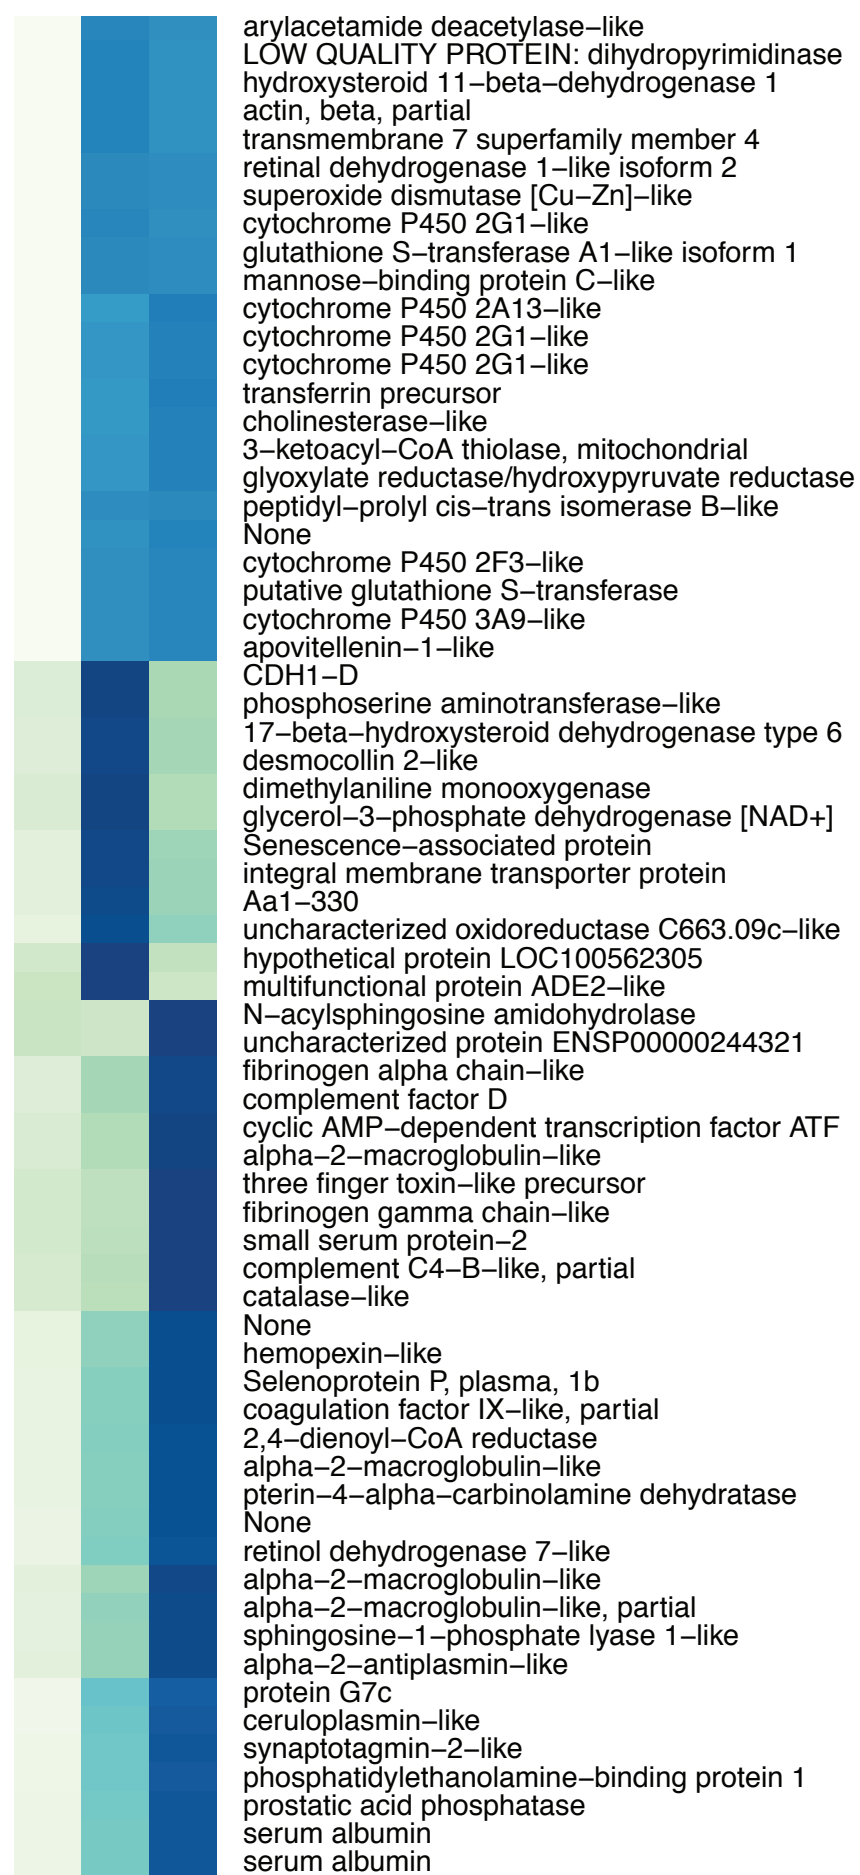

0 1 2

days after feeding

## Pancreas

Figure8.pdf

-1 0 1

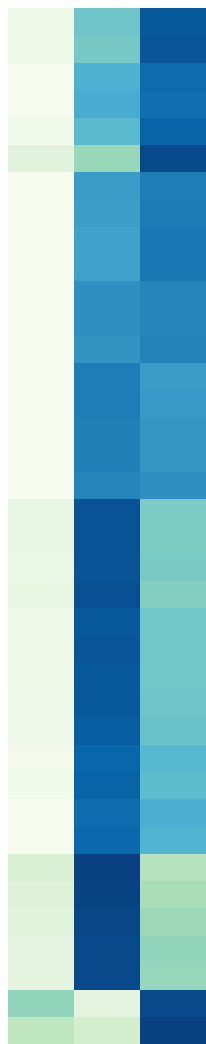

phosphatidylethanolamine-binding protein 1-like  
 hCG1647491-like  
 zymogen granule membrane protein 16-like isoform 1  
 trypsin-1-like isoform 2  
 alpha-amylase 1 isoform 3  
 putative transposase  
 colipase-like  
 cationic trypsin-3-like  
 chymotrypsin-like protease CTRL-1-like  
 pancreatic alpha-amylase-like  
 endonuclease domain-containing 1 protein-like  
 UPF0762 protein C6orf58 homolog  
 chymotrypsin-like elastase family member 1-like  
 natterin-4-like  
 trypsin inhibitor CITI-1  
 UHRF1-binding protein 1-like  
 natterin-4-like  
 None  
 insulin-like  
 cytochrome c oxidase subunit 6B1-like  
 LOC100170417 protein  
 alpha-crystallin B chain-like  
 trypsin I-P1 precursor  
 None  
 calreticulin-like  
 bile salt-activated lipase-like  
 peptidyl-prolyl cis-trans isomerase B-like  
 cysteine-rich with EGF-like domain  
 hypothetical protein LOC100619418  
 acyl-CoA-binding protein-like  
 probable proline dehydrogenase 2-like  
 cytochrome c oxidase subunit 7C, mitochondrial-like  
 translocon-associated protein subunit gamma-like  
 None  
 chymotrypsin B, partial  
 heat shock 70kDa protein 5  
 pancreatic lipase-related protein 1-like  
 VSP\_PHIOL (Venom serine protease)

0 1 2

days after feeding

1. Sampling of digestive fluid

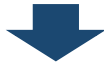

2. Recovery, denaturation, and trypsin treatment of digestive fluid proteins

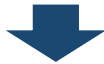

3. LC-MS/MS analyses

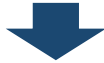

4. Protein identification

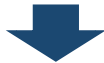

5. Identification of the python stomach secretome

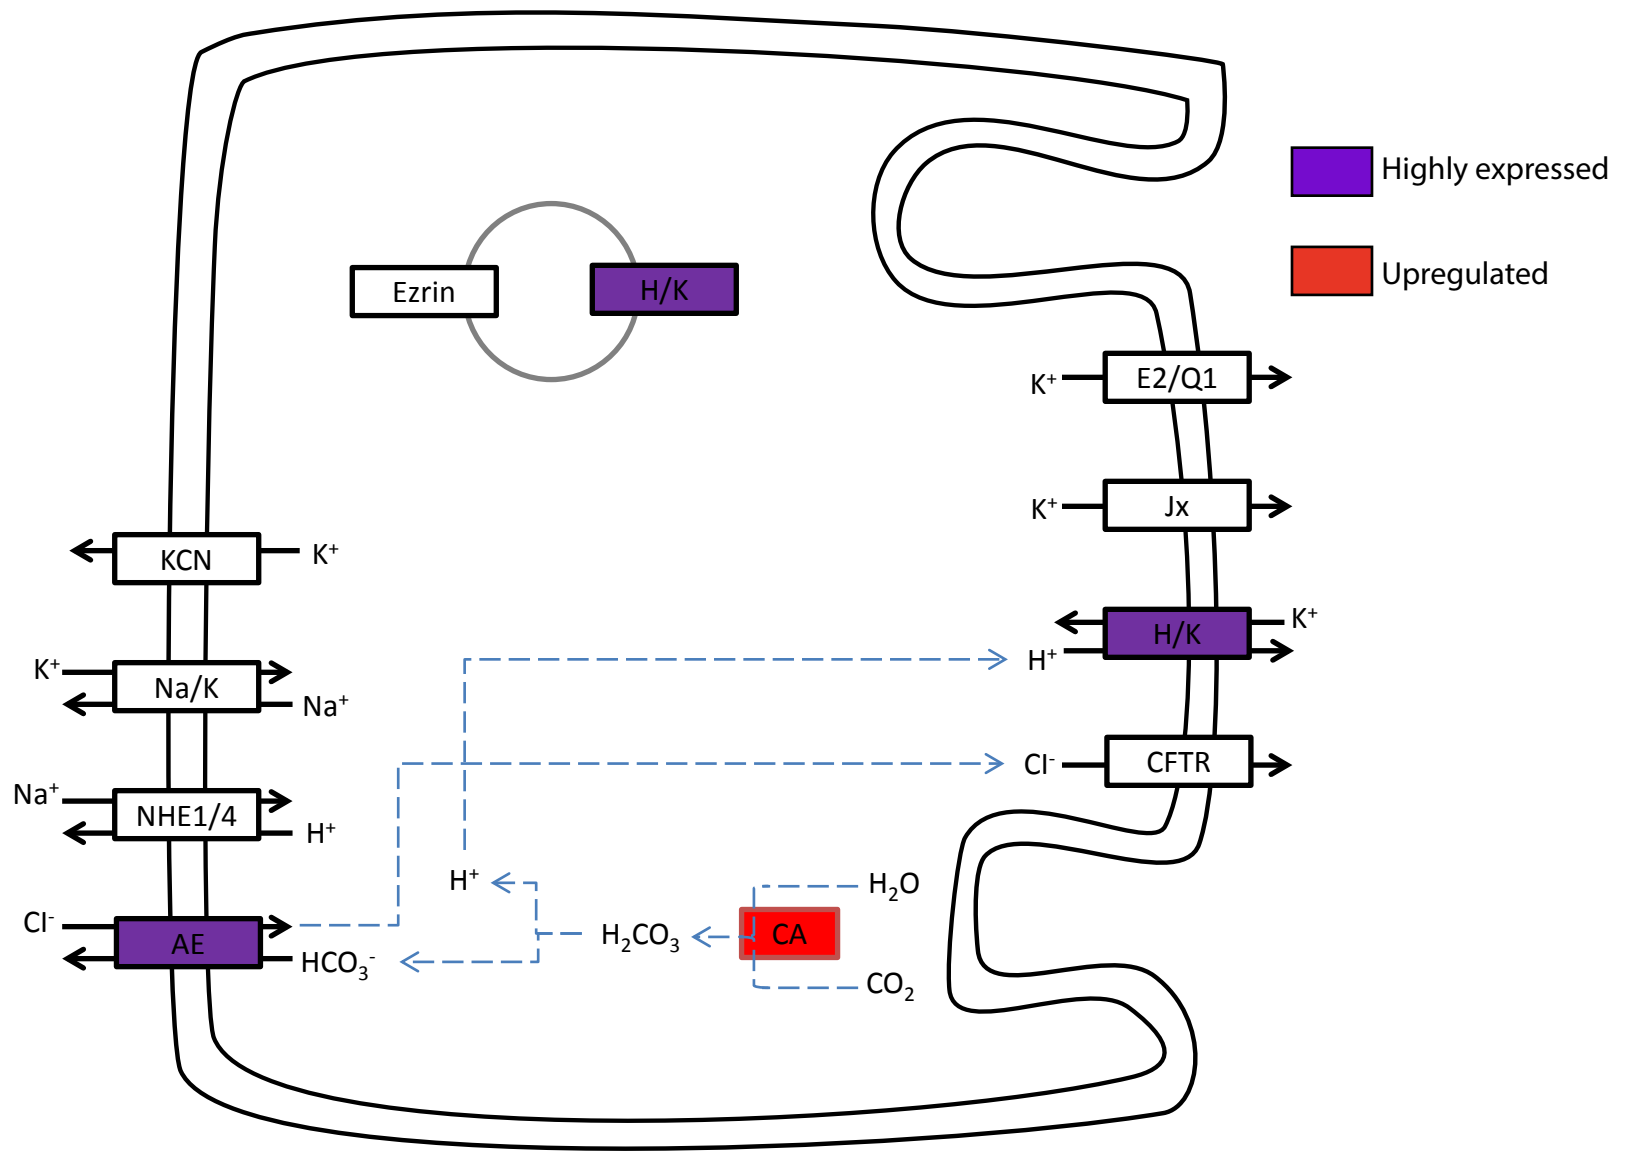



Click here to access/download  
**Supplementary Material**  
FigureS4.pdf





Click here to access/download  
**Supplementary Material**  
FigureS5.pdf





Click here to access/download  
**Supplementary Material**  
FigureS6.pdf



Click here to access/download  
**Supplementary Material**  
FigureS7.pdf



Click here to access/download  
**Supplementary Material**  
FigureS8.pdf



Click here to access/download  
**Supplementary Material**  
FigureS9.pdf

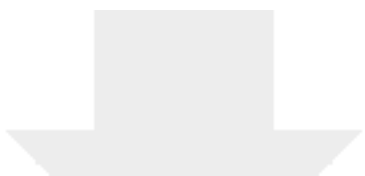

Click here to access/download  
**Supplementary Material**  
TableS3.xlsx





Click here to access/download  
**Supplementary Material**  
TableS5.xlsx





Click here to access/download  
**Supplementary Material**  
TableS6.xlsx







Click here to access/download  
**Supplementary Material**  
TableS7.xlsx



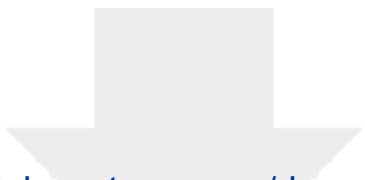

Click here to access/download  
**Supplementary Material**  
TableS8.xlsx





Click here to access/download  
**Supplementary Material**  
TableS9.xlsx





Click here to access/download  
**Supplementary Material**  
TableS10.xlsx





Click here to access/download  
**Supplementary Material**  
TableS11.xlsx



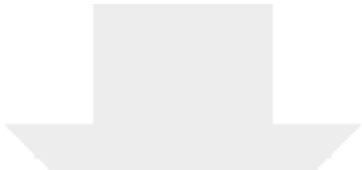

Click here to access/download  
**Supplementary Material**  
TableS12.xlsx



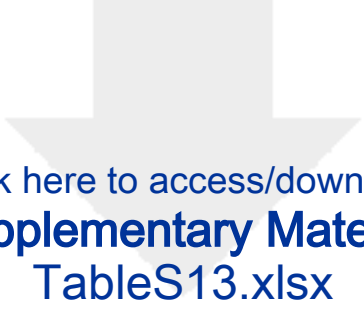

Click here to access/download  
**Supplementary Material**  
TableS13.xlsx





Click here to access/download  
**Supplementary Material**  
TableS14.xlsx





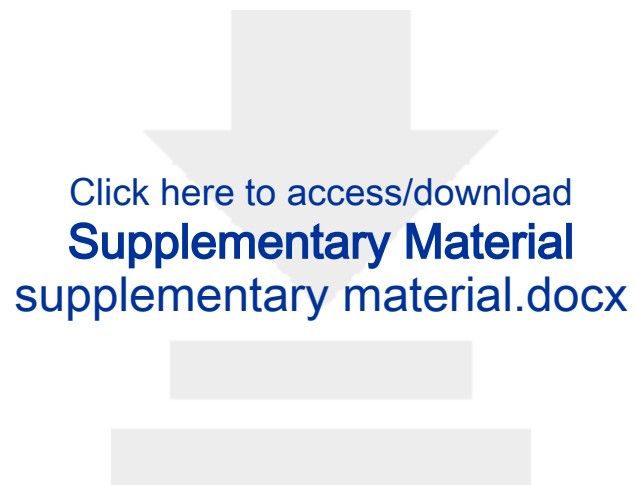

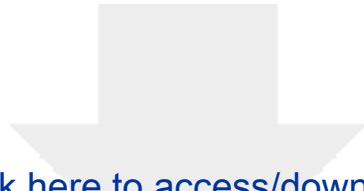

Click here to access/download  
**Supplementary Material**  
AU\_assembly.misassembled.fasta

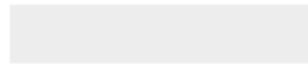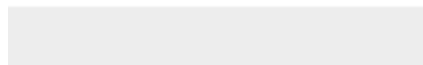

Dear Editor,

Thank you for returning the constructive and useful comments from the two reviewers that kindly evaluated our manuscript entitled “Transcriptome Analysis of the Response of Burmese Python to Digestion” that we submitted for publication in GigaScience. Both reviewers provided positive overall assessments, but also raised a number of specific queries to be addressed in the revision. We are pleased to return a revised manuscript where we have followed all the advice given by the two reviewers. The responses to each query is listed in a separate PDF file where you can see our responses describing the changes we have made to the manuscript. We greatly appreciate these comments and feel the manuscript has been improved in this review-process. We hope you will find the revised manuscript acceptable for publication in GigaScience and we are looking forward to hearing from you in due course. Please do not hesitate to contact me in case you need additional information.

Sincerely yours

Jinjie Duan (on behalf of all the authors)

## Reviewer #1:

The authors used a transcriptomic time-series of five different organs and complementary proteomic surveys to characterize changes in expression following a feeding event in the Burmese Python.

I recommend the acceptance of this manuscript pending revisions. The only major criticism I have for the current manuscript is the lack of comparison to previous studies on this system and believe a section should be added to the manuscript explicitly comparing the time-series transcriptome data of this paper with others (see below). Comments below.

### Introduction

After reading the introduction, it was unclear what knowledge this paper would add considering time-series transcriptome sequencing of particular organs (e.g., heart, liver) has already been performed (e.g., Castoe et al., 2013 PNAS). There is novel work being done in the form of additional tissues and, particularly, the proteomics, and I think the authors should state this explicitly to make it clear to the reader what is novel.

This is a good point and we now emphasize that we have repeated measurements in some tissues, but bring new data regarding the pancreas and the stomach as well as a new time point (48h) into the digestive period. These changes have been made in the second paragraph of the section entitled “background”.

### Methods

Page 26 lines 526-527: Why were the biopsies pooled? This reduced the n from two to one.

At the time (2011) it was for technical and economic reasons, two samples were pooled to average out some of the variability among biological replicates. Yet, we regret not having more biological replicates since this restricts our analysis to highly expressed genes. Nevertheless, by virtue of our three time points (fasting, 24h and 48h, respectively), we do present some biological replication.

Page 27 lines 541-542: Why were samples pooled by tissue? What was the justification?

We included some normalized libraries to sample as broadly from the transcriptome as possible. This also included sampling over the different tissues, such that we would obtain some reads also from lowly expressed, tissue-specific genes. We have added an explanation in line 583 “In addition, to sample as broadly from transcriptome as possible, we also produced normalized libraries for each tissue in order to capture the reads from lowly expressed, tissue-specific genes.”

Page 28 lines 554-560: Although the authors used relatively long k-mers for assembly, they should still perform a specific check for mis-assembled chimeric sequences, especially considering the reads from all libraries were pooled to assemble a reference (see Yang and Smith 2013 BMC Genomics), and this reference was the basis for all subsequent transcriptomic analyses.

To check the mis-assembled chimeric sequences, we have now compared our assembly with the reference genome (Castoe et al) and gene sequences using rnaQUAST, and amended the result (lines 101-115) and method (lines 606-608) sections, correspondingly. The result shows our transcriptome assembly had 34,423 transcripts in total. 34,040 (98%) transcripts had at least 1 significant alignment to the reference genome and 31,102 out of 34,040 were uniquely aligned. Average aligned fraction (i.e. total number of aligned bases in the transcript divided by the total transcript length) was 0.975. The total number of misassembled (chimeric) transcripts, which have discordant best-scored alignment (partial alignments that are either mapped to different strands/different chromosomes/in reverse order/too far away) was 1,974 (5.7%). The FASTA sequences of these misassembled transcripts are attached in Supplementary material.

Page 29 lines 578-579: Why was T-coffee used specifically for albumin-like genes? Justification should be added to the section.

We used T-coffee because it is well recommended for better accuracy of multiple sequences alignment (Thompson et al, 2011, Plos One; Pais et al, 2014, Algorithms Mol Biol). Due to the improved analysis of the albumin-like sequences, we decided to move the “albumin-story” to the supplementary material (A more detailed explanation

is presented below under the responses to comments raised to our “analyses”). The justification of using T-coffee was added in the supplementary material in line 10: “We did multiple sequences alignment of these paralogues genes together with predicted ORF sequences of our five sequences using T-coffee (version 11.00) [2] with default parameters which is well recommended for better accuracy of multiple sequence alignment [3, 4]”.

Page 31 line 623: I failed to follow the text and come up with 6 samples. Were two snakes at 400 g and two snakes at 800 g fed a rodent? If so, these samples, along with the peptone control, equals five. If only one snake at 400 g and one snake at 800 g were fed a rodent, these samples, again along with the control, equal three. I do not see how the authors collected six samples. Was there also an n of two for each of these groups? Additionally, how was plasma collected?

We apologize for the confusing manner in which we originally described these procedures. We have altered to the text in line 650 and 661 to clarify that samples were obtained in duplicate from three individuals snakes (two upon digestion of a rodent meal, as well as one snake that had been fed peptone). We have also added a description in line 668 to explain that the blood (plasma) samples were obtained by cardiac puncture.

## Analyses

Page 8 lines 124-129: How dissimilar were the transcripts (i.e., sequence divergence)? Were the six albumin-like proteins identified in the MS analysis the six most highly-expressed albumin-like transcripts? In other words, was there a detection bias in your MS analyses against low-abundance transcripts? I have seen this in my work (e.g., Rokyta et al., 2015 G3). Also, can the authors be sure that these are different copies and not alternatively spliced transcripts?

We appreciate this concern. After performing additional analyses (phylogenetic analysis and alignment against reference genome), we conclude these albumin-like sequences are most likely alternatively spliced transcripts, rather than paralogues. Therefore, we feel that this part of our results do not longer present sufficient new advance to be discussed in the main text. We accordingly decided to move the albumin results to supplementary material in lines 2-26. In addition, we did observe a

discordance between transcriptome and proteome in our study, which may be due to delayed protein synthesis and degradation. However, the imbalance didn't affect albumin-like transcripts because these six albumin-like transcripts were the six most highly expressed albumin-like transcripts in liver.

Line 197: "the five most abundant proteases identified in the gastric juice": How was protein quantitation performed? The methods do not mention protein quantitation. Are these simply based on spectral counts? If the authors are attempting to quantify the proteome, a more complete transcriptome-proteome comparison is warranted.

We apologize for not clarifying the method in where we originally described. We have added a description to explain the method used on protein quantitation (line 710): "Semi-quantitative proteomics data was obtained using the emPAI-values given by the Mascot 2.5.0 software after analysis of the MS/MS data [67]."

Lines 201, 208: carolinensis should not be capitalized

Thank you for spotting this mistake. It has now been corrected.

Perhaps the largest gap in the current study was the lack of a comparison to previous, extremely similar work on this system (e.g., Castoe et al., 2013 PNAS and Andrew et al., 2015 Physiol. Genomics). How do the authors' results compare to those of previous studies? Were they largely congruent? A section explicitly comparing the current study to previously published works should be added.

For the gene expressions in the intestine, heart and liver where previous data exist (Castoe et al., and Andrew et al), we have added a paragraph in the discussion (second paragraph of the new discussion) describing the overlap of upregulated genes in our and the previous studies. Information on the methods of comparison are now described in the supplementary material. It is noteworthy that the data from the liver was rather similar between studies, whereas the heart and small intestine revealed rather large differences between the studies.

Figures and Tables

Information in table 2 should be provided with the KEGG pathway figures.

We have added the missing information on the color-coding in the KEGG pathway that illustrates the gastric acid secretion (figure 10).

How were the sub-clusters in Figure 3 chosen? Do these represent all of the DEGs for that tissue?

The heat maps in Figure 3 show, for each tissue, all the genes that are both highly and differentially expressed with strict thresholds (defined in section "identification of DEGs and clustering analysis in Method section). We chose those sub-clusters because they represent a cluster of all upregulated genes, which are expected to be involved many functional changes during digestion.

Other

Small grammatical errors throughout, particularly in the discussion.

We have edited the manuscript carefully and hope we have corrected all grammatical mistakes.



## Reviewer #2:

Duan et al. conduct a broad study using transcriptomic and proteomic methods to understand the molecular underpinnings of extreme physiological responses to feeding in Burmese pythons. Overall, the data collected are extensive and reasonably analyzed, and the manuscript is well written. The lack of replication and thorough analyses substantially limit the conclusions and novelty of the study, although generally I do believe that the manuscript is reasonable and valid in its current form. As such, given the aims of the journal, I do believe this manuscript does fit within its scope, as a sound descriptive study associated with a large amount of data that benefits from having these data directly linked to the paper. Below I note a handful of concerns and suggestions that would improve the ms.

I found it interesting that the authors chose to use de novo transcript assemblies rather than the annotated gene set available for the Burmese python genome. The authors make the case that the genome is somewhat fragmentary, which is true, and that this justified the use of a de novo assembly. While I don't completely agree, I do believe that their use of the de novo transcript assembly for mapping RNAseq data is reasonable, and what they find seems quite sensible. I am surprised, however, that they did not compare their annotations in any way to the annotated gene set on NCBI.

We appreciate these good comments. We have compared our assembly with annotated gene set in NCBI using rnaQUAST, and have updated the corresponding result and method section. It now reads in lines 115-120 "The comparison of assembled sequences and reference gene sequences (Supplementary table S3) showed that 26,320 (77.3%) assembled transcripts cover at least one isoform from the reference gene set and the mean fraction of transcript matched is 67.8%, suggesting there is a good concordance but also some differences which can be due to errors in either the reference genome assembly/annotation or our assembly".

Unfortunately, the authors did not have any replication in their RNAseq or proteomic data, and therefore any meaningful statistical comparisons are made difficult - for example, it is difficult to get decent estimates of how many genes are statistically differentially expressed across time points for organ-specific time course analyses. I

assume this is why the authors instead use arbitrary cutoffs: "1) FPKM is greater than or equal to 400 in at least one time point and 2) fold change is greater than or equal to 2 in at least one pairwise comparison among three time points." Without replication, I suppose the authors are somewhat limited in what they can do, and I do accept what they did as reasonable. However, they should avoid any instances of using the word "significant" throughout the text, which they use several times (e.g., LINE: 279: genes with significantly increased expression during digestion"). Honestly, they don't really have the power to detect significance with these data.

We agree that we should avoid the word significant when discussing the results since it is likely read as meaning statistically significant which we cannot know. Consequently, we have moved all "significant" throughout the manuscript.

I am concerned about what might be an over-interpretation of the findings from serum proteomics studies. The authors claim to have found a peptide that they identify in the serum as the protease inhibitor "anti-haemorrhagic factor cHLP-B (m.27\_Py95)", and go on to conclude that "Our data supports older studies that identify these inhibitors of the deleterious action of venom enzymes in non-venomous snakes [32]."... My sense is that they should tone down their conclusion because 1) the python isn't venomous (and thus has no need for such proteins), and 2) the inference is simply based on blast homology with what is likely available online (venomous snake blood peptides). I think the finding is interesting and notable, but their inference of the function of this peptide being directly linked to resistance to venom is quite far fetched - more likely it may be indicative of a class of plasma peptides that could have been recruited in venomous snakes for self-defense against self-venomation.

We agree with the reviewer's point and have changed the words accordingly in lines 255-259 such that it now reads "This is a protease inhibitor of the haemorrhagic-causing metalloproteinases present in snake venom and these inhibitors have previously been purified from serum of venomous snakes and thoroughly characterized [32, 33]. The role of such a protease inhibitor in non-venomous pythons is not obvious, but it has been proposed that they inhibit the deleterious action of venom enzymes in non-venomous snakes [34]."

Discussion section "Physiological interpretation of the upregulated genes in the intestine" - this section is noticeably lacking any citations or linking of results to a previously published in-depth transcriptional study of the python intestine (citation #13). There are also a number of incorrect claims made here (e.g., LINE 379: "It remains, however, unknown to what extent the increased capacity for nutrient uptake is also driven by increased synthesis of nutrient transporters".) that in fact have been clearly demonstrated in citation 13 - these links and statements made in this section need to be carefully re-written to more meaningfully incorporate this previous work.

We agree and appreciate this criticism. In the revised manuscript, we now give more credit to the previous studies in postprandial gene expression and we point more specifically to where there are differences between their findings and those reported by us. We hope you find the revised manuscript to be better balanced.

The figures should be improved for reading as a printed article. For example, there are multiple heat maps that are enormous, and are not printable in any reasonable way that would allow the labels to be read (e.g., Fig. 7). Simply spanning these over multiple columns would at least help with this. Also, while I realize that Gigascience is an online journal, the use of 15 in-text figures seems to be counter-productive for having there be clear points conveyed by the MS, and make the manuscript appear more like a massive data dump rather than a paper.

We have splitted the long heatmaps (Figures 5 and 7) into two columns to enable the reading of the labels.

We have moved the original Figures 9-13,15 and Tables 4-5 to supplementary material.

Copy Edits:

I suggest searching throughout the manuscript and writing out any numbers less than 10. For example: writing out four rather than 4.

Thanks for the comment. We have corrected them throughout the text.

Line 201 (and elsewhere) - change to: *Anolis carolinensis* (here and throughout the MS so that specific name is lower case)

Thanks for the comment. We have corrected them throughout the text.
